# Supplementary material for: Perioperative corticosteroid treatment impairs tumor-infiltrating dendritic cells in patients with newly diagnosed adult-type diffuse gliomas
Source: PubMed Central journal article supplement (PMC9872516; doi:10.3389/fimmu.2022.1074762), 2023-01-10
Supplement: DataSheet_1.pdf [file DataSheet_1.pdf]

Supplementary Table 1. Clinical features of patients and controls.

| assay                   | donors of healthy control samples |     |                  |                                                                                          |                        | Untreated glioma patients |     |                  |                                                                                                       |                                                                                                          | dex-treated glioma patients |     |                  |                                                                                        |                                                          |
|-------------------------|-----------------------------------|-----|------------------|------------------------------------------------------------------------------------------|------------------------|---------------------------|-----|------------------|-------------------------------------------------------------------------------------------------------|----------------------------------------------------------------------------------------------------------|-----------------------------|-----|------------------|----------------------------------------------------------------------------------------|----------------------------------------------------------|
|                         | n                                 | M:F | mean age [range] | WHO 2021 diagnosis                                                                       | histological diagnosis | n                         | M:F | mean age [range] | WHO 2021 diagnosis                                                                                    | histological diagnosis                                                                                   | n                           | M:F | mean age [range] | WHO 2021 diagnosis                                                                     | histological diagnosis                                   |
| PBDCs by flow cytometry | 12                                | 7:5 | 47 [25-69]       |                                                                                          | healthy donors         | 12                        | 7:5 | 54,6 [36-74]     | astrocytoma, IDH mutant (n=2)<br>glioblastoma, IDH wildtype (n=10)                                    | anaplastic astrocytoma (n=1)<br>glioblastoma (n=1)<br>anaplastic astrocytoma (n=4)<br>glioblastoma (n=6) | 11                          | 6:5 | 61,5 [43-74]     | astrocytoma, IDH mutant (n=1)<br>glioblastoma, IDH wildtype (n=10)                     | anaplastic astrocytoma (n=1)<br>glioblastoma (n=10)      |
| TIDCs by flow cytometry | 3                                 | 2:1 | 59,3 [53-69]     | ganglioglioma (n=1)<br>astrocytoma, IDH mutant (n=1)<br>glioblastoma, IDH-wildtype (n=1) | healthy tissue         | 5                         | 3:2 | 52,4 [41-71]     | astrocytoma, IDH mutant (n=1)<br>glioblastoma, IDH wildtype (n=4)                                     | anaplastic astrocytoma (n=1)<br>anaplastic astrocytoma (n=1)<br>glioblastoma (n=3)                       | 5                           | 2:3 | 64 [48-74]       | oligodendroglioma, IDH-mutant and 1p/19q-codeleted<br>glioblastoma, IDH wildtype (n=4) | anaplastic oligodendroglioma (n=1)<br>glioblastoma (n=4) |
| TIDCs by scRNA-seq      | 2                                 | 1:1 | 53 [53-53]       | glioblastoma, IDH-wildtype (n=2)                                                         | anaplastic astrocytoma | 5                         | 3:3 | 54,25 [41-71]    | astrocytoma, IDH mutant (n=2)<br>glioblastoma, IDH wildtype (n=1)<br>glioblastoma, IDH wildtype (n=2) | anaplastic astrocytoma (n=2)<br>anaplastic astrocytoma (n=1)<br>glioblastoma (n=2)                       | 2                           | 1:1 | 68 [67-71]       | glioblastoma, IDH wildtype (n=2)                                                       | glioblastoma (n=2)                                       |

**Supplementary Table 2. List of monoclonal antibodies and reagents used for the analysis of DC subsets by flow cytometry**

| <b>Marker</b>               | <b>Description</b>                                 | <b>Fluorochrome</b> | <b>Clone</b> | <b>Company</b> |
|-----------------------------|----------------------------------------------------|---------------------|--------------|----------------|
| Fixable Viability Stain 780 | Viability marker                                   | APC-Cy7             |              | BD Biosciences |
| CD45                        | Leukocyte common antigen                           | AF700               | HI30         | BD Biosciences |
| CD3                         | Lineage marker—T cells                             | FITC                | HIT3A        | Biolegend      |
| CD14                        | Lineage marker—monocytes                           | BV570               | M5E2         | Biolegend      |
| CD16                        | Lineage marker—NK cells and granulocytes           | BUV496              | 3G8          | BD Biosciences |
| CD19                        | Lineage marker—B cells                             | FITC                | 4G7          | BD Biosciences |
| CD20                        | Lineage marker—B cells                             | FITC                | 2H7          | BD Biosciences |
| CD56                        | Lineage marker—NK cells                            | FITC                | NCAM 16,2    | BD Biosciences |
| HLA-DR                      | Major histocompatibility complex class II molecule | BUV661              | G46-6        | BD Biosciences |
| CD123                       | pDC marker                                         | PE-Cy7              | 7G3          | BD Biosciences |
| CD11c                       | cDC marker                                         | PE-Cy5              | B-ly6        | BD Biosciences |
| CD141 (BDCA-3)              | DC1 marker                                         | BV605               | M80          | Biolegend      |
| CD1c (BDCA-1)               | cDC2 marker                                        | BV421               | L161         | Biolegend      |
| M-DC8 (anti-slan)           | slanDC marker                                      | APC                 | DD-1         | Milteny Biotec |
| CD1a                        | moDC marker                                        | BUV395              | HI149        | BD Biosciences |
| CD40                        | Costimulatory molecule                             | BV650               | 5C3          | BD Biosciences |
| CD80                        | Costimulatory molecule                             | BV510               | L307         | BD Biosciences |
| CD86                        | Costimulatory molecule                             | BUV737              | 2331         | BD Biosciences |
| CD274 (PD-L1)               | Inhibitory molecule                                | PE-CF594            | MIH1         | BD Biosciences |
| CD85j (ILT2)                | Inhibitory molecule                                | PE                  | GHI/75       | Biolegend      |
| CD366 (TIM-3)               | Inhibitory molecule                                | BV711               | 7D3          | BD Biosciences |

**Supplementary Table 3. DEGs between cluster 19 and other clusters.**

| <b>Gene</b> | <b>RNA cell type specificity</b>                                                                                                             |
|-------------|----------------------------------------------------------------------------------------------------------------------------------------------|
| AREG        | Group enriched (eosinophil, basophil, NK-cell)                                                                                               |
| FCER1A      | Cell type enriched (basophil)                                                                                                                |
| HLA-DQA1    | Cell type enhanced (myeloid DC)                                                                                                              |
| HLA-DPB1    | Cell type enhanced (myeloid DC)                                                                                                              |
| LYZ         | Cell type enhanced (classical monocyte, myeloid DC)                                                                                          |
| IL1R2       | Cell type enriched (neutrophil)                                                                                                              |
| VIM         | Low cell type specificity                                                                                                                    |
| S100A6      | Low cell type specificity                                                                                                                    |
| HLA-DQB1    | Group enriched (myeloid DC, naive B-cell, memory B-cell, classical monocyte, intermediate monocyte, plasmacytoid DC)                         |
| C1orf162    | Low cell type specificity                                                                                                                    |
| HLA-DRB5    | Cell type enhanced (myeloid DC)                                                                                                              |
| HLA-DRA     | Group enriched (naive B-cell, memory B-cell, intermediate monocyte, classical monocyte, plasmacytoid DC, non-classical monocyte)             |
| FCGR2B      | Cell type enhanced (basophil, memory B-cell)                                                                                                 |
| MS4A6A      | Group enriched (classical monocyte, myeloid DC, plasmacytoid DC, intermediate monocyte, basophil)                                            |
| GAPT        | Cell type enriched (eosinophil)                                                                                                              |
| LSP1        | Low cell type specificity                                                                                                                    |
| CD163       | Group enriched (classical monocyte, myeloid DC)                                                                                              |
| HLA-DPA1    | Group enriched (myeloid DC, intermediate monocyte, memory B-cell, naive B-cell, non-classical monocyte, plasmacytoid DC, classical monocyte) |
| S100A10     | Low cell type specificity                                                                                                                    |
| S100A4      | Low cell type specificity                                                                                                                    |
| AKR1C3      | Cell type enhanced (basophil, gdT-cell)                                                                                                      |
| HLA-DRB1    | Cell type enhanced (myeloid DC)                                                                                                              |
| CLEC10A     | Cell type enriched (myeloid DC)                                                                                                              |
| JAML        | Cell type enhanced (eosinophil)                                                                                                              |
| CD1C        | Group enriched (myeloid DC, memory B-cell)                                                                                                   |
| CST3        | Group enriched (myeloid DC, intermediate monocyte, classical monocyte, plasmacytoid DC, non-classical monocyte)                              |
| PLAC8       | Cell type enhanced (plasmacytoid DC)                                                                                                         |
| ANXA2       | Low cell type specificity                                                                                                                    |
| CD1E        | Cell type enriched (myeloid DC)                                                                                                              |
| IFITM3      | Cell type enriched (myeloid DC)                                                                                                              |
| STK2B       | Low cell type specificity                                                                                                                    |
| PPA1        | Low cell type specificity                                                                                                                    |
| RNASE6      | Cell type enhanced (plasmacytoid DC)                                                                                                         |
| TMSB10      | Low cell type specificity                                                                                                                    |
| TGFBI       | Group enriched (plasmacytoid DC, classical monocyte, myeloid DC, intermediate monocyte, non-classical monocyte)                              |
| RPS18       | Low cell type specificity                                                                                                                    |
| CSTA        | Group enriched (classical monocyte, myeloid DC, intermediate monocyte, neutrophil, non-classical monocyte)                                   |
| LGALS1      | Low cell type specificity                                                                                                                    |
| RPS2        | Low cell type specificity                                                                                                                    |
| PSTPIP2     | Cell type enhanced (eosinophil)                                                                                                              |
| GPR183      | Low cell type specificity                                                                                                                    |
| PKIB        | Cell type enriched (myeloid DC)                                                                                                              |
| ANXA1       | Low cell type specificity                                                                                                                    |
| SNX3        | Low cell type specificity                                                                                                                    |
| RPL4        | Low cell type specificity                                                                                                                    |
| CD74        | Group enriched (naive B-cell, memory B-cell, myeloid DC, intermediate monocyte, plasmacytoid DC, classical monocyte, non-classical monocyte) |
| RPL18A      | Low cell type specificity                                                                                                                    |
| CLEC4A      | Group enriched (classical monocyte, myeloid DC, neutrophil, intermediate monocyte, basophil, non-classical monocyte)                         |
| TAGLN2      | Low cell type specificity                                                                                                                    |
| RPS24       | Low cell type specificity                                                                                                                    |



|                                            |          |       |                                                                                                                                                                                                                                                                                                                                                                                                                                                                                                                                                                                                                           |
|--------------------------------------------|----------|-------|---------------------------------------------------------------------------------------------------------------------------------------------------------------------------------------------------------------------------------------------------------------------------------------------------------------------------------------------------------------------------------------------------------------------------------------------------------------------------------------------------------------------------------------------------------------------------------------------------------------------------|
| Lymphocyte migration                       | 348E-06  | -4.79 | ITGAL,PLAUCOS,PRKQJ,HNRP1,IL16,RASGRP1,MYH9,DOCK8,STAT3,CCR4,CD8A,HMGB1,IL7R,CBLB,LYT11,CTP2,LAG3,ZAP70,S1PR1,RA2,IL2,CCL5,CLTC,ERZ,SRPD1,IAK1,CD69,ANXA1,CD47,NRAS,BATF,RAF1,BITG4A,EVL,ETS1,FAS,STK4,SKAP1,SEMA40,MAPK14,IFI1R,IRFNG,ITGAE,RICTOR,PKSR1,RA2,CAQ3,ICP1,PFN,INPP5D,ITK,PLCB3,HS90AA1,CCR2,GPRI32,STM2,CD58,BCL11B,TNFSF14,MAP3K14,MYB,NR1H2,ARCC1,POCD1,CD44,PYCARD,SGS1,ARHGEP1,BCL2,XCL1,SH2D1A,CD2                                                                                                                                                                                                     |
| Cell movement of lymphocytes               | 520E-06  | -4.65 | ITGAL,PLAUCOS,PRKQJ,HNRP1,IL16,RASGRP1,MYH9,DOCK8,STAT3,CCR4,CD8A,HMGB1,IL7R,CBLB,LYT11,CTP2,ACTN4,LAG3,ZAP70,S1PR1,RA2,IL2,CCL5,CLTC,ERZ,SRPD1,IAK1,CD69,ANXA1,CD47,NRAS,BATF,RAF1,BITG4A,EVL,ETS1,FAS,STK4,SKAP1,SEMA40,C9orf103,MAPK14,IFI1R,IRFNG,ITGAE,RICTOR,WIP1,PKSR1,RA2,CAQ3,ICP1,PFN,INPP5D,ITK,PLCB3,HS90AA1,PTD,CCR2,GPRI32,STM2,BCL11B,CD58,TNFSF14,MAP3K14,MYB,NR1H2,ARCC1,POCD1,CD44,PYCARD,SGS1,ARHGEP1,BCL2,XCL1,SH2D1A,CD2                                                                                                                                                                             |
| Differentiation of T lymphocytes           | 1,31E-10 | -4.56 | IRF1,ICOS,CDKN2A,IL2,RLCK,CHB,HMGB1,IL7R,IL2,SMAD2,CD44,SOC2,PTGER4,MAPK,PRDM1,GBA,KLBD1,USP15,STT1,DNAH3,BATF,STAT5B,ETS1,BH01,HMG1,ZBTB16,RICTOR,PTPN22,NDRP1,ITPK9,STAT5,CD3D,NCOR1,PRDX2,CCR2,STAT4,NOTCH1,BCL11B,CD3,GMAP3K14,IMP6,GIMAP1,PARP1,CD40LG,BCL2,SP3,TNFRSF18,PARP1,TRK2,1,DSIP1,ITGAL,PRKQJ,CARF9,GATA3,MALT1,STAT3,STAT5A,CD8A,CBLB,ZAP70,NKAZ2,IL18R1,CYLD,GRAP2,CD3E,DNAH3,CCL5,ZEB1,IAK1,CD69,OR8A3,SH2D2,CA,HD,ANXA1,BH01,C9orf103,MAPK14,IFI1R,IRFNG,ITGAE,RICTOR,WIP1,DEFB1,DEFB1,ITK,TOX,SLAMF6,PRKDC,HS90AA1,GADD45G,CD8B,PREX1,ATM,PPP3C1B,SLA,PCD1,IRF2,THEM5,TNFAIP3,SOC1,PTPRC,CD247,SH2D1A |
| Maturation of leukocytes                   | 1,58E-03 | -4.33 | IRF1,BH01,HUNG,ICOS,CDKN2A,PKSR1,RASGRP1,PHC1,ICP1,EF1,STAT3,CCR4,PFN,INPP5D,HMGB1,STAT5A,IL7R,IL2,CTK,ITK,LAG3,ITK,DGQZ,PTP1,CCR2,CD3E,IL2,CCL5,NOTCH1,GPRI32,TNFSF14,ATM,SRSF2,MAP3K14,PRDM1,CD44,CD47,CD40LG,RGS1,PTPRC,FAS,CD247,TRK21                                                                                                                                                                                                                                                                                                                                                                                |
| Homing of mononuclear leukocytes           | 8,99E-03 | -4.33 | ITGAL,ITGAE,WIPF1,PLA2G6,IL16,RAC2,ICP1,F2R,STAT3,CCR4,PFN,HMGB1,C9orf103,ITK,AN06,PBRK,LYT11,PTD,RR,HEBP1,S1PR1,CCR2,IL2,CCL5,TNFSF14,PTP,ROJAK1,FBY,CD44,ANXA1,RGS1,BCL2,BATF,RAF1,BITG4A,XCL1,STK4                                                                                                                                                                                                                                                                                                                                                                                                                     |
| Binding of leukocytes                      | 1,45E-02 | -4.27 | ITGAL,FAF4H18,PLAUCOS,PRKQJ,RASGRP1,STK2,CCR4,IL7R,IL2,CTK,ITK,CBLB,RA2,IL2,P2RY8,CCL5,TLN1,ERZ,IAK1,PTGER4,ANXA1,CD47,ADGRES,RAF1,BITG4A,EVL,FAS,KNAP,STK4,SKAP1,SEMA40,IFI1R,IRFNG,RICTOR,PTPN22,PLA2G6,CD6,RAC2,B4GALT1,PFN,INPP5D,ITK,MGAT5,PLCB3,PRDX2,HS90AA1,PAK2,ANGPT2,PREX1,CD58,MSN,MAP3K14,MYB,IMP6,CD44,CD40LG,RGS1,ARHGEP1,PTPRC,TNIP1,SH2D1A,STK4,CD2                                                                                                                                                                                                                                                      |
| Quantity of hematopoietic progenitor cells | 9,15E-12 | -4.21 | IRF1,AKAP13,CDKN2A,FCER1,G,RASGRP1,IL2,IRG,CCR4,IL7R,IL2,CTK,ITK,LAG3,ITK,IL2,CTK,ITK,CBLB,RA2,IL2,P2RY8,CCL5,TLN1,ERZ,IAK1,PTGER4,ANXA1,CD47,ADGRES,RAF1,BITG4A,EVL,FAS,KNAP,STK4,SKAP1,SEMA40,IFI1R,IRFNG,RICTOR,PTPN22,PLA2G6,CD6,RAC2,B4GALT1,PFN,INPP5D,ITK,MGAT5,PLCB3,PRDX2,HS90AA1,PAK2,ANGPT2,PREX1,CD58,MSN,MAP3K14,MYB,IMP6,CD44,CD40LG,RGS1,ARHGEP1,PTPRC,TNIP1,SH2D1A,STK4,CD2                                                                                                                                                                                                                               |
| Quantity of lymphoid tissue                | 3,20E-11 | -4.20 | IRF1,ICOS,CDKN2A,FCER1,G,RASGRP1,IL2,IRG,CCR4,IL7R,IL2,CTK,ITK,LAG3,ITK,IL2,CTK,ITK,CBLB,RA2,IL2,P2RY8,CCL5,TLN1,ERZ,IAK1,PTGER4,ANXA1,CD47,ADGRES,RAF1,BITG4A,EVL,FAS,KNAP,STK4,SKAP1,SEMA40,IFI1R,IRFNG,RICTOR,PTPN22,PLA2G6,CD6,RAC2,B4GALT1,PFN,INPP5D,ITK,MGAT5,PLCB3,PRDX2,HS90AA1,PAK2,ANGPT2,PREX1,CD58,MSN,MAP3K14,MYB,IMP6,CD44,CD40LG,RGS1,ARHGEP1,PTPRC,TNIP1,SH2D1A,STK4,CD2                                                                                                                                                                                                                                 |
| Adhesion of immune cells                   | 1,51E-02 | -4.18 | ITGAL,FAF4H18,PLAUCOS,PRKQJ,RASGRP1,STK2,CCR4,IL7R,IL2,CTK,ITK,CBLB,RA2,IL2,P2RY8,CCL5,TLN1,ERZ,IAK1,PTGER4,ANXA1,CD47,ADGRES,RAF1,BITG4A,EVL,FAS,KNAP,STK4,SKAP1,SEMA40,IFI1R,IRFNG,RICTOR,PTPN22,PLA2G6,CD6,RAC2,B4GALT1,PFN,INPP5D,ITK,MGAT5,PLCB3,PRDX2,HS90AA1,PAK2,ANGPT2,PREX1,CD58,MSN,MAP3K14,MYB,IMP6,CD44,CD40LG,RGS1,ARHGEP1,PTPRC,TNIP1,SH2D1A,STK4,CD2                                                                                                                                                                                                                                                      |
| Quantity of thymocytes                     | 1,07E-12 | -4.07 | IRF1,PRKQJ,CDKN2A,FCER1,G,RASGRP1,IL2,IRG,STAT3,CCR4,CD8A,IL7R,IL2,CTK,ITK,CBLB,RA2,IL2,P2RY8,CCL5,TLN1,ERZ,IAK1,PTGER4,ANXA1,CD47,ADGRES,RAF1,BITG4A,EVL,FAS,KNAP,STK4,SKAP1,SEMA40,IFI1R,IRFNG,RICTOR,PTPN22,PLA2G6,CD6,RAC2,B4GALT1,PFN,INPP5D,ITK,MGAT5,PLCB3,PRDX2,HS90AA1,PAK2,ANGPT2,PREX1,CD58,MSN,MAP3K14,MYB,IMP6,CD44,CD40LG,RGS1,ARHGEP1,PTPRC,TNIP1,SH2D1A,STK4,CD2                                                                                                                                                                                                                                          |
| Quantity of thymus gland                   | 4,60E-13 | -3.91 | IRF1,PRKQJ,CDKN2A,FCER1,G,RASGRP1,IL2,IRG,STAT3,CCR4,CD8A,IL7R,IL2,CTK,ITK,CBLB,RA2,IL2,P2RY8,CCL5,TLN1,ERZ,IAK1,PTGER4,ANXA1,CD47,ADGRES,RAF1,BITG4A,EVL,FAS,KNAP,STK4,SKAP1,SEMA40,IFI1R,IRFNG,RICTOR,PTPN22,PLA2G6,CD6,RAC2,B4GALT1,PFN,INPP5D,ITK,MGAT5,PLCB3,PRDX2,HS90AA1,PAK2,ANGPT2,PREX1,CD58,MSN,MAP3K14,MYB,IMP6,CD44,CD40LG,RGS1,ARHGEP1,PTPRC,TNIP1,SH2D1A,STK4,CD2                                                                                                                                                                                                                                          |
| Quantity of natural killer T lymphocytes   | 5,61E-11 | -3.89 | IRF1,BH01,ITGAL,ITGAE,ITGAE,ITGAE,AP3H1,PRKQJ,RICTOR,IL2,RLCK,ITK,LAG3,ITK,IL2,CTK,ITK,CBLB,RA2,IL2,P2RY8,CCL5,TLN1,ERZ,IAK1,PTGER4,ANXA1,CD47,ADGRES,RAF1,BITG4A,EVL,FAS,KNAP,STK4,SKAP1,SEMA40,IFI1R,IRFNG,RICTOR,PTPN22,PLA2G6,CD6,RAC2,B4GALT1,PFN,INPP5D,ITK,MGAT5,PLCB3,PRDX2,HS90AA1,PAK2,ANGPT2,PREX1,CD58,MSN,MAP3K14,MYB,IMP6,CD44,CD40LG,RGS1,ARHGEP1,PTPRC,TNIP1,SH2D1A,STK4,CD2                                                                                                                                                                                                                              |
| Maturation of mononuclear leukocytes       | 3,84E-04 | -3.86 | BH01,HUNG,ICOS,CDKN2A,RASGRP1,PHC1,ICP1,EF1,STAT3,CCR4,PFN,INPP5D,HMGB1,STAT5A,IL7R,IL2,CTK,ITK,DGQZ,LAG3,ITK,DGQZ,PTP1,CCR2,CD3E,IL2,NOTCH1,GPRI32,ATM,SRSF2,MAP3K14,PRDM1,CD44,ANXA1,CD47,ADGRES,RAF1,BITG4A,EVL,FAS,SH2D1A,CD2,STK4,SKAP1                                                                                                                                                                                                                                                                                                                                                                              |
| Interaction of mononuclear leukocytes      | 6,26E-04 | -3.84 | ITGAL,HUNG,PLAUCOS,RICTOR,CD6,RAC2,RASGRP1,B4GALT1,CCR4,IL7R,IL2,CTK,ITK,CBLB,RA2,IL2,P2RY8,CCL5,TLN1,ERZ,IAK1,PTGER4,ANXA1,CD47,ADGRES,RAF1,BITG4A,EVL,FAS,KNAP,STK4,SKAP1,SEMA40,IFI1R,IRFNG,RICTOR,PTPN22,PLA2G6,CD6,RAC2,B4GALT1,PFN,INPP5D,ITK,MGAT5,PLCB3,PRDX2,HS90AA1,PAK2,ANGPT2,PREX1,CD58,MSN,MAP3K14,MYB,IMP6,CD44,CD40LG,RGS1,ARHGEP1,PTPRC,TNIP1,SH2D1A,STK4,CD2                                                                                                                                                                                                                                            |
| Differentiation of B lymphocytes           | 1,15E-03 | -3.82 | ICOS,IL2,RG,PHC1,MALT1,EF1,SPK1,STAT3,CCR4,PKSR1,IL7R,IL2,CTK,ITK,LAG3,ITK,IL2,CTK,ITK,CBLB,RA2,IL2,P2RY8,CCL5,TLN1,ERZ,IAK1,PTGER4,ANXA1,CD47,ADGRES,RAF1,BITG4A,EVL,FAS,KNAP,STK4,SKAP1,SEMA40,IFI1R,IRFNG,RICTOR,PTPN22,PLA2G6,CD6,RAC2,B4GALT1,PFN,INPP5D,ITK,MGAT5,PLCB3,PRDX2,HS90AA1,PAK2,ANGPT2,PREX1,CD58,MSN,MAP3K14,MYB,IMP6,CD44,CD40LG,RGS1,ARHGEP1,PTPRC,TNIP1,SH2D1A,STK4,CD2                                                                                                                                                                                                                              |
| Cell viability of T lymphocytes            | 3,17E-09 | -3.81 | CSK1,ICOS,PRKQJ,RICTOR,IL2,RLCK,ITK,LAG3,ITK,IL2,CTK,ITK,CBLB,RA2,IL2,P2RY8,CCL5,TLN1,ERZ,IAK1,PTGER4,ANXA1,CD47,ADGRES,RAF1,BITG4A,EVL,FAS,KNAP,STK4,SKAP1,SEMA40,IFI1R,IRFNG,RICTOR,PTPN22,PLA2G6,CD6,RAC2,B4GALT1,PFN,INPP5D,ITK,MGAT5,PLCB3,PRDX2,HS90AA1,PAK2,ANGPT2,PREX1,CD58,MSN,MAP3K14,MYB,IMP6,CD44,CD40LG,RGS1,ARHGEP1,PTPRC,TNIP1,SH2D1A,STK4,CD2                                                                                                                                                                                                                                                            |
| Adhesion of T lymphocytes                  | 1,14E-05 | -3.79 | ITGAL,HUNG,PLAUCOS,RICTOR,CD6,RAC2,RASGRP1,CCR4,IL7R,IL2,CTK,ITK,CBLB,RA2,IL2,P2RY8,CCL5,TLN1,ERZ,IAK1,PTGER4,ANXA1,CD47,ADGRES,RAF1,BITG4A,EVL,FAS,SH2D1A,CD2,STK4,SKAP1                                                                                                                                                                                                                                                                                                                                                                                                                                                 |
| Interaction of T lymphocytes               | 2,17E-05 | -3.77 | ITGAL,HUNG,PLAUCOS,RICTOR,CD6,RAC2,RASGRP1,CCR4,IL7R,IL2,CTK,ITK,CBLB,RA2,IL2,P2RY8,CCL5,TLN1,ERZ,IAK1,PTGER4,ANXA1,CD47,ADGRES,RAF1,BITG4A,EVL,FAS,SH2D1A,CD2,STK4,SKAP1                                                                                                                                                                                                                                                                                                                                                                                                                                                 |
| Proliferation of lymphocytes               | 9,98E-18 | -3.77 | IRF1,AKAP13,CDKN2A,FCER1,G,RASGRP1,IL2,IRG,CCR4,IL7R,IL2,CTK,ITK,LAG3,ITK,IL2,CTK,ITK,CBLB,RA2,IL2,P2RY8,CCL5,TLN1,ERZ,IAK1,PTGER4,ANXA1,CD47,ADGRES,RAF1,BITG4A,EVL,FAS,KNAP,STK4,SKAP1,SEMA40,IFI1R,IRFNG,RICTOR,PTPN22,PLA2G6,CD6,RAC2,B4GALT1,PFN,INPP5D,ITK,MGAT5,PLCB3,PRDX2,HS90AA1,PAK2,ANGPT2,PREX1,CD58,MSN,MAP3K14,MYB,IMP6,CD44,CD40LG,RGS1,ARHGEP1,PTPRC,TNIP1,SH2D1A,STK4,CD2                                                                                                                                                                                                                               |
| Proliferation of mononuclear leukocytes    | 2,86E-17 | -3.73 | IRF1,AKAP13,CDKN2A,FCER1,G,RASGRP1,IL2,IRG,CCR4,IL7R,IL2,CTK,ITK,LAG3,ITK,IL2,CTK,ITK,CBLB,RA2,IL2,P2RY8,CCL5,TLN1,ERZ,IAK1,PTGER4,ANXA1,CD47,ADGRES,RAF1,BITG4A,EVL,FAS,KNAP,STK4,SKAP1,SEMA40,IFI1R,IRFNG,RICTOR,PTPN22,PLA2G6,CD6,RAC2,B4GALT1,PFN,INPP5D,ITK,MGAT5,PLCB3,PRDX2,HS90AA1,PAK2,ANGPT2,PREX1,CD58,MSN,MAP3K14,MYB,IMP6,CD44,CD40LG,RGS1,ARHGEP1,PTPRC,TNIP1,SH2D1A,STK4,CD2                                                                                                                                                                                                                               |
| Binding of mononuclear leukocytes          | 2,13E-04 | -3.72 | ITGAL,HUNG,PLAUCOS,RICTOR,CD6,RAC2,RASGRP1,B4GALT1,CCR4,IL7R,IL2,CTK,ITK,CBLB,RA2,IL2,P2RY8,CCL5,TLN1,ERZ,IAK1,PTGER4,ANXA1,CD47,ADGRES,RAF1,BITG4A,EVL,FAS,KNAP,STK4,SKAP1,SEMA40,IFI1R,IRFNG,RICTOR,PTPN22,PLA2G6,CD6,RAC2,B4GALT1,PFN,INPP5D,ITK,MGAT5,PLCB3,PRDX2,HS90AA1,PAK2,ANGPT2,PREX1,CD58,MSN,MAP3K14,MYB,IMP6,CD44,CD40LG,RGS1,ARHGEP1,PTPRC,TNIP1,SH2D1A,STK4,CD2                                                                                                                                                                                                                                            |
| Interaction of lymphocytes                 | 3,55E-04 | -3.71 | ITGAL,HUNG,PLAUCOS,RICTOR,CD6,RAC2,RASGRP1,CCR4,IL7R,IL2,CTK,ITK,CBLB,RA2,IL2,P2RY8,CCL5,TLN1,ERZ,IAK1,PTGER4,ANXA1,CD47,ADGRES,RAF1,BITG4A,EVL,FAS,KNAP,STK4,SKAP1,SEMA40,IFI1R,IRFNG,RICTOR,PTPN22,PLA2G6,CD6,RAC2,B4GALT1,PFN,INPP5D,ITK,MGAT5,PLCB3,PRDX2,HS90AA1,PAK2,ANGPT2,PREX1,CD58,MSN,MAP3K14,MYB,IMP6,CD44,CD40LG,RGS1,ARHGEP1,PTPRC,TNIP1,SH2D1A,STK4,CD2                                                                                                                                                                                                                                                    |
| Binding of T lymphocytes                   | 2,82E-06 | -3.66 | ITGAL,HUNG,PLAUCOS,RICTOR,CD6,RAC2,RASGRP1,CCR4,IL7R,IL2,CTK,ITK,CBLB,RA2,IL2,P2RY8,CCL5,TLN1,ERZ,IAK1,PTGER4,ANXA1,CD47,ADGRES,RAF1,BITG4A,EVL,FAS,SH2D1A,CD2,STK4,SKAP1                                                                                                                                                                                                                                                                                                                                                                                                                                                 |
| Maturation of lymphocytes                  | 1,49E-03 | -3.63 | BH01,HUNG,ICOS,CDKN2A,RASGRP1,PHC1,ICP1,EF1,STAT3,CCR4,PFN,INPP5D,HMGB1,STAT5A,IL7R,IL2,CTK,ITK,DGQZ,LAG3,ITK,DGQZ,PTP1,CCR2,CD3E,IL2,NOTCH1,ATM,SRSF2,MAP3K14,PRDM1,CD44,ANXA1,CD47,ADGRES,RAF1,BITG4A,EVL,FAS,SH2D1A,CD2,STK4,SKAP1                                                                                                                                                                                                                                                                                                                                                                                     |
| Adhesion of lymphocytes                    | 1,16E-04 | -3.62 | ITGAL,HUNG,PLAUCOS,RICTOR,CD6,RAC2,RASGRP1,CCR4,IL7R,IL2,CTK,ITK,CBLB,RA2,IL2,P2RY8,CCL5,TLN1,ERZ,IAK1,PTGER4,ANXA1,CD47,ADGRES,RAF1,BITG4A,EVL,FAS,SH2D1A,CD2,STK4,SKAP1                                                                                                                                                                                                                                                                                                                                                                                                                                                 |
| Proliferation of immune cells              | 3,92E-16 | -3.61 | IRF1,AKAP13,CDKN2A,FCER1,G,RASGRP1,IL2,IRG,CCR4,IL7R,IL2,CTK,ITK,LAG3,ITK,IL2,CTK,ITK,CBLB,RA2,IL2,P2RY8,CCL5,TLN1,ERZ,IAK1,PTGER4,ANXA1,CD47,ADGRES,RAF1,BITG4A,EVL,FAS,KNAP,STK4,SKAP1,SEMA40,IFI1R,IRFNG,RICTOR,PTPN22,PLA2G6,CD6,RAC2,B4GALT1,PFN,INPP5D,ITK,MGAT5,PLCB3,PRDX2,HS90AA1,PAK2,ANGPT2,PREX1,CD58,MSN,MAP3K14,MYB,IMP6,CD44,CD40LG,RGS1,ARHGEP1,PTPRC,TNIP1,SH2D1A,STK4,CD2                                                                                                                                                                                                                               |

|                                          |          |       |                                                                                                                                                                                                                                                                                                                                                                                                                                                                                                                                                                                                                                                                                                                                                                                                                                                                                                                                                                                                                                                                   |
|------------------------------------------|----------|-------|-------------------------------------------------------------------------------------------------------------------------------------------------------------------------------------------------------------------------------------------------------------------------------------------------------------------------------------------------------------------------------------------------------------------------------------------------------------------------------------------------------------------------------------------------------------------------------------------------------------------------------------------------------------------------------------------------------------------------------------------------------------------------------------------------------------------------------------------------------------------------------------------------------------------------------------------------------------------------------------------------------------------------------------------------------------------|
| Binding of lymphocytes                   | 754E-05  | -3.60 | ITGAL,PLAU,IFNG,ICOS,RICTOR,CD6,RAC2,RASGRP1,CXCR4,IL7R,ITK,IRLBP,HS90AA1,IL18R1,RA2,AIL2,CCL5,CD58,MSN,EZRAK1,FYB1,MDM6,CD44,ANXA1,CD47,RGS1,ARHGEP1,RAP1,ITGA4,FAS,SH2D1,ANKP,CD2,STK4,SKAP1                                                                                                                                                                                                                                                                                                                                                                                                                                                                                                                                                                                                                                                                                                                                                                                                                                                                    |
| Adhesion of mononuclear leukocytes       | 2.88E-04 | -3.59 | ITGAL,PLAU,IFNG,ICOS,RICTOR,RAC2,RASGRP1,CXCR4,IL7R,ITK,IRLBP,HS90AA1,RA2,AIL2,ANGPT2,CD58,EZR,JAK1,FYB1,CD44,ANXA1,CD47,CD40LG,RGS1,ARHGEP1,RAP1,ITGA4,FAS,SH2D1,ANKP,CD2,SKAP1                                                                                                                                                                                                                                                                                                                                                                                                                                                                                                                                                                                                                                                                                                                                                                                                                                                                                  |
| Cell cycle progression                   | 5.12E-07 | -3.58 | ITGAL,IFNG,ATG5,CDKN2A,CD320,IKZF1,IKZF1,STAT3,INPP5D,STAT5,AIL7,RLCK,LAG3,ZAP70,SKL,KRAS,IL2,STAT4,ATM,ANBP1,IKBKKR,CD40LG,NDK,CDKN1B,ICL2,SOC51,PTPRC,ICL2L1,STAT5B                                                                                                                                                                                                                                                                                                                                                                                                                                                                                                                                                                                                                                                                                                                                                                                                                                                                                             |
| Cell viability of B lymphocytes          | 3.70E-04 | -3.52 | SEMA4D,RICTOR,WIPF1,MALT1,SYK,INPP5D,TSC22D3,ITPKB,STAT5,AIL7,PRKCB,IKKAS,SH3BP1,NAIP1,MAP3K14,LAX1,IKBKB,LY9,PRDM1,CD44,GIMAP1,CD40LG,NAIP2,ICL2,FCMR,ICL2L1,STAT5B                                                                                                                                                                                                                                                                                                                                                                                                                                                                                                                                                                                                                                                                                                                                                                                                                                                                                              |
| T cell migration                         | 2.88E-04 | -3.51 | ITGAL,IFNG,PLAU,ICOS,PRKQ,ITGAE,HNRNP1,PKR1,IL16,RAC2,AQP3,LC1,MYH9,DOCK8,STAT3,CXCR4,FYN,INPP5D,ITK,PLCB1,LAT,LAG3,HS90AA1,ZAP70,S1PR1,CCR2,ICL2,CCL5,ICL11B,TNFSF14,MAP3K14,EZR,SMFPD1,JAK1,FYB1,NR1H2,ABCC1,PDCC1,CD69,CD44,CD47,RGS1,ICL2,BATE,ITGA4,XCL1,STK4                                                                                                                                                                                                                                                                                                                                                                                                                                                                                                                                                                                                                                                                                                                                                                                                |
| Quantity of CD8+ T lymphocyte            | 6.75E-11 | -3.50 | IRF1,PRKQ,P2RX5,CDKN2A,PRKACB,RASGRP1,IL2RG,MALT1,DOCK8,STING1,ARHGEP6,CDRA1,CK,PRKCH,LAG3,CYLD,GRAP2,CD3E,IL2,TXNIP,SMFPD1,PRF1,ZEB1,HUST,TAPBP,PPARD,ST11,BATF,GNLY,BCLAF1,ETS1,STAT5B,STK4,RHOH,IFNG,IL2R,PTPN22,RAC2,TAP1,ELK4,GRP18,STAT5A,CD3D,ITK,TOX,TRIB2,KRAS,CCR2,CD8B,CD5,ICL11B,MAP3K14,IKBKG1,PDCC1,THEM8,HLA-A,BCL2,PTPRC,TNFSF18,CD247,SH2D1A,CASP9                                                                                                                                                                                                                                                                                                                                                                                                                                                                                                                                                                                                                                                                                               |
| Cell proliferation of T lymphocytes      | 6.73E-16 | -3.49 | IRF1,NCOR2,ZAKAP13,FTL,ICOS,CDKN2A,FCER1G,GNRNPI,RASBP1,IL2RG,ELF1,STING1,CXCR4,BIND,HMGB1,IL7,RLCK,LAG3,LAT,TRAF1,LAG3,NCK1,SKL,IL2,IL2,TXNIP,TLN1,DLG1,TCF7,CD46,PTGER4,PRDM1,KLRD1,CD47,ST11,DNAJ3,BTN3A1,BATF,BCLAF1,PCBP2,ICL2L1,ETS1,STAT5B,FAS,STK4,CBP,RIH0H,MARCH7,SAMF1,WBP2,IFNG,CREB1,D,OKZ,ZBTB16,RICTOR,CBLA,PTPN22,NRIP1,WIPF1,KZF3,LC1,OPR17,FYN,STAT5A,PD4D,CDK2,RRD2,WWP2,CD27,CCR2,RAS2,STAT4,NOTCH1,MER,CDS,CD3,MAP3K14,LY9,ANAPC1,PPP3CA,PP2R,PARP1,CD40LG,BCL2,ARHGEP1,TNFSF18,ICL1,CD2,P,GAIP3,AINAK,DISP10,IFZAK2,ITGAL,WASHC1,ATG5,PLA1,IRL2,PRKQ,PPP2R5C,G,AT3A,MALT1,DOCK8,IFNG,IKK5,SYK,STAT3,ARHGEP6,CDNA,ANOG,GNB1,PRKCB,CTTP,ZAP70,SGS2L3,CD3,GRAP2,CD3E,PAG1,CCL5,PRF1,SMFPD1,IKBKB,MY1,CD69,SH2D2,ANXA1,PPARD,IRAP,CDK6,IRK2,ICL2,ICL1,CD2,MAP3K14,STK17B,SNAP1,ZSK3B,MAP2K7,MAPK14,S1PR4,IKBBI,IL2RB,SELENOK,PRKCI,CD6,RAC2,ICK3,ICK3,INPP5D,TSC22D3,DEF6,ITK,PAF1,NG,AT5,TOX,HEH,IKC3H2,TNFSF14,ATM,MSN,PPP3R1,TGTR,NR1,ICL2,PDCC1,CD44,IFZ2,THEM8,NCSTN,TNFAIP3,MAP3K8,BUNN3,IMBASH3A,SOC51,PTPRC,CD247,SH2D1A,CASP9,TBC1D10C |
| Activation of natural killer cells       | 8.04E-03 | -3.49 | FLT3LG,IL2,ITGAL,STAT4,TXNIP,IFNG,KLRB1,PRF1,SOC52,RASGRP1,NCR1,MALT1,HLA-A,KLR2C,STAT5B,SH2D1A,CASP9,LYST,HEBP1,IL18R1                                                                                                                                                                                                                                                                                                                                                                                                                                                                                                                                                                                                                                                                                                                                                                                                                                                                                                                                           |
| Differentiation of helper T lymphocytes  | 1.19E-04 | -3.34 | IRF1,MAPK14,ITGAL,IFNG,ICOS,PRKQ,RICTOR,IL2RB,NDP1F1,GRB9,CD6,MALT1,GATA3,STAT3,DEF6,HMGB1,STAT5A,ITK,CBLB,GAD45,QL1,BHL,NRA2,IL2,STAT4,DNAJ11,CCL5,NOTCH1,SMAD2,MAP3K14,SOC52,PTGER4,PRDM1,MAP,CD69,ROR,SH2D2,ANXA1,KLRD1,ISPF15,ST11,CD40LG,CDKN1B,BATF,ETS1,TNFSF18,SH2D1A,PGAP3,TRK21                                                                                                                                                                                                                                                                                                                                                                                                                                                                                                                                                                                                                                                                                                                                                                         |
| Transmigration of mononuclear leukocytes | 1.07E-02 | -3.29 | CCR2,F1R,ITGAL,IFNG,CCL5,CD99,RAC2,CD44,AQP3,MYH9,CD47,CD40LG,ITK,ITGA4,HS90AA1,ZAP70                                                                                                                                                                                                                                                                                                                                                                                                                                                                                                                                                                                                                                                                                                                                                                                                                                                                                                                                                                             |
| NK cell homeostasis                      | 3.67E-05 | -3.24 | FLT3LG,IRF1,SLAMF1,HECTD1,IL2RB,PRDM1,TAPBP,IL2RG,IRF2,IKZF1,GATA3,STAT3,INPP5D,STAT5A,SP3,TOX,SLAMF6,KAT7,PTPRC,STAT5B,ETS1,TRK21                                                                                                                                                                                                                                                                                                                                                                                                                                                                                                                                                                                                                                                                                                                                                                                                                                                                                                                                |
| Expansion of lymphocytes                 | 7.36E-07 | -3.21 | IRF1,ICOS,SYK,STING1,STAT3,HMGB1,IL7,RLAT,LAG3,ZAP70,S1PR1,GRAP2,CD3E,IL2,CCND2,PRF1,IKBKB,PI3K,CD69,BRAF,CDKN1B,ICL2L1,ETS1,STAT5B,FAS,CREB1,IFNG,ZBTB16,IL2RB,PTPN22,LC1,IKZF1,CCND3,DEF6,STAT5,ITK,TOX,CD27,SGRR,STAT4,MYBL1,LY9,NR1H2,PDCC1,IRF2,PARP1,CD40LG,TNFAIP3,ICL2,SOC51,PTPRC,TNFSF18                                                                                                                                                                                                                                                                                                                                                                                                                                                                                                                                                                                                                                                                                                                                                                |
| Flux of Ca2+                             | 1.01E-03 | -3.20 | ICOS,PRKRI,RAC2,SYK,CXCR4,INPP5D,ITK,PLCB1,NM2,DOGKLAT,RACE1,HEBP1,CD3E,PAG1,CCL5,GRP132,DLG1,STM2,CD5,EZR,WDR37,LAX1,ANXA1,PARP1,FAS,BINB                                                                                                                                                                                                                                                                                                                                                                                                                                                                                                                                                                                                                                                                                                                                                                                                                                                                                                                        |
| Maturation of T lymphocytes              | 2.88E-05 | -3.19 | RHOH,IL2,CD3E,NOTCH1,ATM,SRSP2,CDKN2A,RASGRP1,ELF1,CXCR4,FYN,IL7,RLCK,ITK,RINX3,PTPRC,DOGKLAT,CD247,TRK21                                                                                                                                                                                                                                                                                                                                                                                                                                                                                                                                                                                                                                                                                                                                                                                                                                                                                                                                                         |
| Generation of helper T lymphocytes       | 2.39E-03 | -3.19 | IL2,STAT4,IFNG,ICOS,CD5,SMAD2,PRKQ,PNKQ,MAP3K14,PPP3CA,ROR,GA,GATA3,STAT3,STAT5A,ITK,TRK21,S1PR1                                                                                                                                                                                                                                                                                                                                                                                                                                                                                                                                                                                                                                                                                                                                                                                                                                                                                                                                                                  |
| Expansion of T lymphocytes               | 5.27E-05 | -3.16 | IRF1,CREB1,IFNG,ICOS,ZBTB16,PTPN22,IKZF1,LC1,SYK,STAT3,STING1,DEF6,HMGB1,IL7R,ITK,TOX,LAT,LAG3,CD27,ZAP70,GRAP2,CD3E,IL2,STAT4,PRF1,IKBKB,LY9,NR1H2,PI3K,PDCC1,CD69,IRF2,PARP1,IRAP,CD40LG,CDKN1B,ICL2,TNFSF18,STAT5B,FAS                                                                                                                                                                                                                                                                                                                                                                                                                                                                                                                                                                                                                                                                                                                                                                                                                                         |
| Activation of leukocytes                 | 2.97E-09 | -3.13 | NCOR2,MTND5,ICOS,NC1F,FCER1G,IL16,RASGRP1,IL2RG,STARD7,STING1,HMGB1,TLXN1,ALCK,PRKCB,LAT,TRAF1,LAG3,SIRPC,NCK1,ITLSH,IKBP1,IL2,TXNIP,TLN1,DLG1,CD46,LAX1,SOC52,PTGER4,PRDM1,GRAP2,GRZ,KLRD1,CD47,ST11,BTN3A1,GNLY,AZ2,BCLAF1,ICL2L1,BAK,ETS1,STAT5B,FAS,FLT3LG,RIH0H,SLAMF1,IFNG,FOXP1,PTPN22,NDP1F1,RA,HA,FYN,ITPKB,STAT5A,DOGKLAT,CD27,MSA1,IKK2,STAT4,NOTCH1,MER,CDS,CD5,ICL11B,CD3D,CAMBA,KLRD1,PPP3CA,INDB9,PPCABD,HLA,CD40LG,CD27,ZMBA,BCL2,VTI1B,TNFSF18,CD27,LYST,AHNAK,ITGAL,ATG5,PRKQ,PRKCB,IL2RB,IRK2,CD69,IRF2,PARP1,CD40LG,CD3E,PAG1,CCL5,PRF1,SMFPD1,IKBKB,MGST1,RIH0A,ABH1,SH2D2,ANXA1,ABR1,ICL2,CD3,IL2,STAT4,NOTCH1,MER,CDS,CD5,ICL11B,CD3D,CAMBA,KLRD1,PPP3CA,INDB9,PPCABD,HLA,CD40LG,CD27,ZMBA,BCL2,VTI1B,TNFSF18,CD27,LYST,AHNAK,ITGAL,ATG5,PRKQ,PRKCB,IL2RB,IRK2,CD69,IRF2,PARP1,CD40LG,CD3E,PAG1,CCL5,PRF1,SMFPD1,IKBKB,MGST1,SH2D2,ANXA1,CDKN1B,HSF11,SEMA4D,MAPK14,PKR3,CD247,SH2D1A,CASP9,TBC1D10C                                                                                                                                       |
| Quantity of double-positive thymocyte    | 7.88E-09 | -3.13 | IRF1,H0H,PRKQ,IL2RB,CDKN2A,IL2RG,IKZF1,CCND3,CXCR4,CD8A,ITK,IRLBP,RLCK,ITK,NM2,PRKCH,LAT,PRKDC,CTE44,ZAP70,CYLD,CD3E,GRAP2,IL2,CDS,ICL11B,ATM,ZBTB16,THEM8,PPARD,CD40LG,ST11,CDKN1B,CD7,BCL2,PTPRC,MTZ,ETS1,CD247,STK17B                                                                                                                                                                                                                                                                                                                                                                                                                                                                                                                                                                                                                                                                                                                                                                                                                                          |
| Clonal expansion of lymphocytes          | 3.78E-04 | -3.12 | GRAP2,IL2,PARP1,SYK,STAT4,HMGB1,IFNG,LAT,CD27,ZAP70,S1PR1                                                                                                                                                                                                                                                                                                                                                                                                                                                                                                                                                                                                                                                                                                                                                                                                                                                                                                                                                                                                         |
| Clonal expansion of T lymphocytes        | 6.12E-04 | -3.12 | GRAP2,IL2,PARP1,SYK,STAT4,HMGB1,IFNG,LAT,CD27,ZAP70                                                                                                                                                                                                                                                                                                                                                                                                                                                                                                                                                                                                                                                                                                                                                                                                                                                                                                                                                                                                               |
| Activation of mononuclear leukocytes     | 4.92E-13 | -3.10 | NCOR2,ICOS,NC1F,FCER1G,RASGRP1,IL2RG,STING1,HMGB1,TLXN1,ALCK,PRKCB,LAT,TRAF1,SIRPC,LAG3,NCK1,IL2,SH3BP1,TXNIP,TLN1,DLG1,CD46,LAX1,SOC52,PTGER4,PRDM1,KLRD1,CD47,ST11,BTN3A1,BCLAF1,AZ2,ICL2L1,BAK,STAT5B,FAS,FLT3LG,RIH0H,SLAMF1,IFNG,FOXP1,PTPN22,NDP1F1,RA,HA,FYN,ITPKB,STAT5A,DOGKLAT,CD27,MSA1,IKK2,STAT4,NOTCH1,MER,CDS,CD5,ICL11B,CD3D,CAMBA,KLRD1,PPP3CA,PPCABD,HLA,CD40LG,CD27,ZMBA,BCL2,VTI1B,TNFSF18,CD27,LYST,AHNAK,ITGAL,ATG5,PRKQ,PRKCB,IL2RB,IRK2,CD69,IRF2,PARP1,CD40LG,CD3E,PAG1,CCL5,PRF1,SMFPD1,IKBKB,MGST1,SH2D2,ANXA1,CDKN1B,HSF11,SEMA4D,MAPK14,PKR3,CD247,SH2D1A,CASP9,TBC1D10C                                                                                                                                                                                                                                                                                                                                                                                                                                                             |
| Expansion of mononuclear leukocytes      | 5.10E-07 | -3.07 | IRF1,ICOS,SYK,STING1,STAT3,HMGB1,IL7,RLAT,LAG3,ZAP70,S1PR1,GRAP2,CD3E,IL2,CCND2,PRF1,IKBKB,PI3K,CD69,BRAF,CDKN1B,ICL2L1,STAT5B,ETS1,FAS,FLT3LG,IFNG,CREB1,ZBTB16,IL2RB,PTPN22,LC1,IKZF1,CCND3,DEF6,STAT5,ATK,TOX,CD27,SGRR,STAT4,MYBL1,LY9,NR1H2,SENP1,PDCC1,IRF2,PARP1,CD40LG,TNFAIP3,ICL2,SOC51,PTPRC,C,TNFSF18                                                                                                                                                                                                                                                                                                                                                                                                                                                                                                                                                                                                                                                                                                                                                 |
| Development of B lymphocytes             | 2.43E-03 | -2.99 | FLT3LG,ITGAL,IFNG,ICOS,PLEKH2,RICTOR,TAB2,PKR1,IL2RG,PHC1,CCND3,DOCK8,SYK,CXCR4,INPP5D,FYN,ITPKB,STAT5,AIL7R,ITR,IL2,EP300,IKBKB,PRDM1,CD69,ROR,NCSTN,CD40LG,BCL2,ITGA4,ICL2L1                                                                                                                                                                                                                                                                                                                                                                                                                                                                                                                                                                                                                                                                                                                                                                                                                                                                                    |
| Transmigration of T lymphocytes          | 1.66E-02 | -2.98 | CD47,CCL5,IFNG,ITK,HS90AA1,RAC2,CD44,AQP3,ZAP70,MYH9                                                                                                                                                                                                                                                                                                                                                                                                                                                                                                                                                                                                                                                                                                                                                                                                                                                                                                                                                                                                              |
| NK cell development                      | 1.18E-06 | -2.95 | FLT3LG,IRF1,SLAMF1,HECTD1,IL2RB,TAPBP,IL2RG,IRF2,IKZF1,GATA3,STAT3,INPP5D,STAT5A,SP3,TOX,SLAMF6,KAT7,PTPRC,STAT5B,ETS1,TRK21                                                                                                                                                                                                                                                                                                                                                                                                                                                                                                                                                                                                                                                                                                                                                                                                                                                                                                                                      |

|                                                  |          |       |                                                                                                                                                                                                                                                                                                                                                                                                                                                                                                                                                                                                                                                                                                                                                                                                                                                                                                                                   |
|--------------------------------------------------|----------|-------|-----------------------------------------------------------------------------------------------------------------------------------------------------------------------------------------------------------------------------------------------------------------------------------------------------------------------------------------------------------------------------------------------------------------------------------------------------------------------------------------------------------------------------------------------------------------------------------------------------------------------------------------------------------------------------------------------------------------------------------------------------------------------------------------------------------------------------------------------------------------------------------------------------------------------------------|
| Development of imate lymphoid cells              | 1.61E-07 | -2.93 | FLT3LG,IRF1,SLAMF1,ZBTB16,HECTD1,IL2RB,TAPP1,IL2RG,IRF2,JZP1,GATA3,STAT3,INPP5D,STAT5A,SP1,TOX,SLAMF6,KAT7,PTPRC,STAT5R,ETS1,SH2D1A,TRX21                                                                                                                                                                                                                                                                                                                                                                                                                                                                                                                                                                                                                                                                                                                                                                                         |
| Cell movement of T lymphocytes                   | 5.23E-04 | -2.93 | IFNG,ICOS,ITGAE,HNRP1,PIK3R1,IL16,RAC2,AQP1,LCF1,MYH9,DOCK8,STAT3,CXCR4,LYN,INPP5D,ITK,PLC,IL2,LAG3,HS90AA1,ZAP70,S1PR1,CCR2,IL2,CCL5,BCL11R,TNFSF14,SMPD1,JA1,LYN1,NR1H2,POCD1,CD69,CD44,CD47,ICOS1,BCL2,BATF,ITGA4,XCL1,STK4                                                                                                                                                                                                                                                                                                                                                                                                                                                                                                                                                                                                                                                                                                    |
| Cell viability of hematopoietic progenitor cells | 4.55E-03 | -2.93 | CD3E,IL2,TCF7,ATM,NABP1,GMAP1,NABP2,RAP9A,BCL2,STAT5A,IL7R,PSMD1,BCL2L1,STAT5B                                                                                                                                                                                                                                                                                                                                                                                                                                                                                                                                                                                                                                                                                                                                                                                                                                                    |
| Quantity of invariant natural killer T cells     | 6.53E-04 | -2.92 | NOTCH1,ICOS,ATG5,BCL11R,RICTOR,PTB1,LY9,RASGRP1,ELF1,TNFAIP3,IL7R,BAK,ETS1                                                                                                                                                                                                                                                                                                                                                                                                                                                                                                                                                                                                                                                                                                                                                                                                                                                        |
| Activation of lymphocytes                        | 3.62E-13 | -2.88 | NCOR2,ICOS,NCF1,FCER1G,RASGRP1,IL2RG,STING1,HMGB1,TXN1,ALCK,PRKCB,LAT,TRAF1,SH2B3,LAG3,NCK1,SH3KBP1,IL2,TKNIP,TLN1,DJL1,CD46,LAX1,SOCS2,PTGER4,PRDM1,KLRD1,CD47,ST1,BTN3A1,BCLAF1,AZ2,BCL2L1,BAX,STAT5B,FASET5,FLT3LG,SLAMF1,IFNG,PTPN22,NDP1,LYN,ITPK8,STAT5A,DGKZ,SLA2,CD27,MS4A1,CCR2,STAT4,MBP,NOTCH1,BCL11R,CD5,CD58,CD3E,CD3G,CAMK4,KIR3C1,PPP3CA,RYR2,CD40LG,CD37,GZMA,BCL2,VT1B,TNFSF18,CD2,LYST,AHNAK1,ITGALATG5,PRKAA1,PLEKH2,PRKQ,RAE29,MAL71,SYK,STAT3,AN06,PUTS,CBLZAP70,NR4A2,IL18R1,CD3E,PAG1,CCL5,PRF1,SMPD1,IKKBR,MGST1,SH2D2A,ANXA1,CDKN3,IL18,SH3P1,SEMA4D,MAPK14,PIK3IP1,TNFAIP3,IL2,KLRB1,IL2RB,TAR2,CD6,INPP5D,DEFB,CLEC2D,IL2RC2,PPP2R3C,ITK,MGAT5,HEBP1,PAR2,TNFSF14,PPP3CB,TIGIT,POCD1,CD44,NCR3,TNFAIP3,SOCS3,PTPRC,CD247,SH2D1A,CASP8,TRC1D10C                                                                                                                                                         |
| Cell death of immune cells                       | 1.54E-10 | -2.88 | IRF1,ICOS,CDKN2A,FCER1G,IL2RG,ELF1,F2R,CXCR4,STING1,HMGB1,IL7R,IL2K,PRKCB,LAT,TRAF1,LAG3,TLK4,SKIL,TRIS1,PR1,IL2,SH3KBP1,TLN1,TCF7,EZBLAX1,PTGER4,PRDM1,ZC3H8,CD47,DNAH3,CAMK2G,BIRC6,BCL2L1,PCMR,BAX,STAT5B,FASET5,LYWHAZ,STK4,FLT3LG,RHOH,SLC6A6,CREB1,IFNG,FOXO1,ZBTB16,RICTOR,PTPN22,WIPF1,H12,FYN,RAP9A,ITPK8,SG15,STAT5A,WIPF2,CD27,MS4A1,CASP10,STAT4,NOTCH1,GPR132,RAIP1,CD51,BCL11R,CD3E,CD99,NABP1,EP300,MAP3K14,CAMK4,LYN,ACTG2,ALKBH1,RYR2,GMAP1,PARP1,CD40LG,SOAT1,GZMA,BCL2,ARHGAP1,TNFRSF18,DRMDL3,XCL1,CD2,ANZF1,EIF2A2,ITGALATG5,PRKQ,PRKAA1,ICP2,MAL71,DOCK8,SYK,STAT3,NOX2L,PKR3,AP1,IRS2,ZAP70,PRKCE1,CTD,GRAP2,CD3E,CCL5,SMFP1,PIF1,IKKBR,PI3K,SH2D2A,RAI1,ANXA1,CDKN1B,PSMD1,CASP7,STK17B,SEMA4D,OSK3,GMAP4,MAPK14,TNFAIP3,IL2RB,PIK3R1,CD6,RAE2,INPP5D,TSC22D1,DHAP,ITK,MGAT5,PRKDC,GAD65,GSK3A,ANGPT2,ATM,LYN,PPP3CB,POCD1,CD44,CASP8,NABP2,TNFAIP3,MAP3K2,SOCS3,PPP2R2,IL2,PTPRC,CD247,SH2D1A,CASP8,XR8B |
| Differentiation of Th1 cells                     | 7.17E-03 | -2.86 | IRF1,IL2,ITGAL,STAT4,IFNG,ICOS,PRKQ,CD6,MAP,SH2D2A,ANXA1,KLRD1,CD40LG,ST1,HMGB1,TRX21,GADD45G,IL18R1                                                                                                                                                                                                                                                                                                                                                                                                                                                                                                                                                                                                                                                                                                                                                                                                                              |
| Homing of T lymphocytes                          | 2.86E-03 | -2.84 | IL2,CCR2,CCL5,TNFSF14,ITGAE,JA1,LYN1,IL16,RAC2,CD44,LCF1,STAT3,CXCR4,LYN,ICOS1,BCL2,ITK,BATF,ITGA4,LAT,XCL1,STK4,S1PR1                                                                                                                                                                                                                                                                                                                                                                                                                                                                                                                                                                                                                                                                                                                                                                                                            |
| Response of lymphocytes                          | 9.03E-05 | -2.82 | FLT3LG,MAPK34,IFNG,ICOS,SIP1A,IL18R1,PIK3R1,JSD1L1,MAL71,DOCK8,STAT3,LYN,ITPK8,STAT5A,IL7R,ITK,CBLB,CD27,ITK,CD3E,IL2,CD5,SMAD2,LAX1,IKKBR,TIGIT,POCD1,NCR3,RYR2,PARP1,CD40LG,CDKN1B,CASP3,PTPRC,TNFRSF18,STAT5B,ETS1,SH2D1A,PGAP3,TRX21,CASP8                                                                                                                                                                                                                                                                                                                                                                                                                                                                                                                                                                                                                                                                                    |
| Stimulation of leukocytes                        | 7.72E-03 | -2.78 | FLT3LG,SLAMF1,IFNG,ICOS,CD3E20,PIK3R1,LYN,TXN1,ALCK,ITK,IL18R1,CD3E,GRAP2,IL2,PAR2,MBP,CD5,TNFSF14,SMAD2,KIR3C1,POCD1,RYR2,CD40LG,CDKN1B,CASP3,PTPRC,TNFRSF18,STAT5B,ETS1,SH2D1A,PGAP3,TRX21,CASP8                                                                                                                                                                                                                                                                                                                                                                                                                                                                                                                                                                                                                                                                                                                                |
| Maintenance of leukocytes                        | 2.32E-03 | -2.78 | GATA3,IL2,CXCR4,ICOS,IL7R,ITK,PRDM1,PIK3C3                                                                                                                                                                                                                                                                                                                                                                                                                                                                                                                                                                                                                                                                                                                                                                                                                                                                                        |
| Development of helper T lymphocytes              | 2.39E-03 | -2.77 | IL2,STAT4,NOTCH1,IFNG,ICOS,CD5,SMAD2,PRKQ,PRKAA1,MAP3K14,PPP3CA,ROB,GATA3,STAT3,STAT5A,ITK,TRX21                                                                                                                                                                                                                                                                                                                                                                                                                                                                                                                                                                                                                                                                                                                                                                                                                                  |
| Chemotaxis of PBMCs                              | 2.45E-02 | -2.75 | CCR2,IL2,CXCR4,F2R,CCL5,PLA2G6,ANXA1,LCF1                                                                                                                                                                                                                                                                                                                                                                                                                                                                                                                                                                                                                                                                                                                                                                                                                                                                                         |
| Quantity of natural killer cells                 | 4.06E-06 | -2.71 | FLT3LG,IRF1,RHOH,IFNG,P2RX5,IL2RB,FCER1G,SP13,IL2RG,IRF1,GATA3,CXCR4,INPP5D,SG15,STAT5A,TOX,PRKDC,ITK,IL2,ANGPT2,TKNIP,PRF1,HCST,RYR2,TNFAIP3,BCL2,PTPRC,ETS1,DMT2E,STAT5B,CD247,TRX21                                                                                                                                                                                                                                                                                                                                                                                                                                                                                                                                                                                                                                                                                                                                            |
| Mobilization of Ca <sup>2+</sup>                 | 8.39E-03 | -2.71 | PRKQ,WIPF1,PIK3R1,CD6,SLC9A3R1,CXCR4,LYN,DEP1,PIK3AP1,LCCK,ITK,MGAT5,CBLB,LAT,PTGDR,ZAP70,HEBP1,MS4A1,GRAP2,CD3E,CCL5,CD5,SH2D2A,NCR3,PTPRC,CD2                                                                                                                                                                                                                                                                                                                                                                                                                                                                                                                                                                                                                                                                                                                                                                                   |
| Response of mononuclear leukocytes               | 1.22E-04 | -2.70 | FLT3LG,MAPK34,IFNG,ICOS,SIP1A,IL18R1,PIK3R1,JSD1L1,MAL71,DOCK8,STAT3,LYN,ITPK8,STAT5A,IL7R,ITK,CBLB,SLA2,CD27,ITK,CD3E,IL2,CD5,SMAD2,LAX1,IKKBR,TIGIT,POCD1,TAPP1,CD69,NCR3,RYR2,PARP1,CD40LG,CDKN1B,CASP3,PTPRC,BCL2L1,BAX,STAT5B,ETS1,TNFSF18,FA5,SH2D1A,PGAP3,TRX21,CASP8                                                                                                                                                                                                                                                                                                                                                                                                                                                                                                                                                                                                                                                      |
| Quantity of pre-B lymphocytes                    | 8.99E-04 | -2.68 | FLT3LG,CYLD,XRAS,IL2,NABP1,PIK3R1,PI3K1,IL2RG,IKZF1,SVK,CXCR4,INPP5D,NABP2,BCL2,IL7R,RAP1B,DMT2E,ZBTB7A,STAT5B,ETS1                                                                                                                                                                                                                                                                                                                                                                                                                                                                                                                                                                                                                                                                                                                                                                                                               |
| Quantity of pre-B lymphocytes                    | 9.77E-05 | -2.65 | FLT3LG,AKAP13,PIK3R1,IKZF1,IL2RG,IKZF1,CCND3,SVK,CXCR4,INPP5D,LYN,PIK3AP1,IL7R,IL2,IL2,IL2,CYLD,MS4A1,XRAS,IL2,ATM,EP300,MAP3K14,NABP1,LYN,PI3K1,MAPK,CD69,GMAP1,NABP2,BCL2,RAIP1B,DMT2E,ZBTB7A,STAT5B,ETS1,SH2D1A,EP515                                                                                                                                                                                                                                                                                                                                                                                                                                                                                                                                                                                                                                                                                                          |
| Contact growth inhibition                        | 3.50E-05 | -2.63 | IFNG,CDKN1B,ALCK,PTPRC,IKZF3,ZAP70,IKZF1                                                                                                                                                                                                                                                                                                                                                                                                                                                                                                                                                                                                                                                                                                                                                                                                                                                                                          |
| Cell movement of B lymphocytes                   | 3.18E-03 | -2.63 | CCR2,IL2,ITGAL,ICOS,MAP3K14,WIPF1,NR1H2,PIK3R1,RAC2,LCF1,CXCR4,INPP5D,ICOS1,HMGB1,ARHGAP1,RAIP1B,STK4,ZAP70,RAIP2A,S1PR1                                                                                                                                                                                                                                                                                                                                                                                                                                                                                                                                                                                                                                                                                                                                                                                                          |
| T cell response                                  | 1.07E-07 | -2.63 | FLT3LG,MAPK34,IFNG,ICOS,SIP1A,PIK3R1,JSD1L1,MAL71,DOCK8,STAT3,LYN,ITPK8,STAT5A,IL7R,ITK,CBLB,CD27,ITK,CD3E,IL2,CD5,SMAD2,LAX1,IKKBR,TIGIT,POCD1,RYR2,PARP1,CD40LG,CDKN1B,CASP3,PTPRC,TNFRSF18,ETS1,STAT5B,SH2D1A,PGAP3,TRX21,CASP8                                                                                                                                                                                                                                                                                                                                                                                                                                                                                                                                                                                                                                                                                                |
| Differentiation of gamma-delta T lymphocytes     | 1.27E-05 | -2.63 | IL2,SYK,NOTCH1,IL7R,IL2K,STAT5A,LAT,PTPRC,STAT5B,IL2RG                                                                                                                                                                                                                                                                                                                                                                                                                                                                                                                                                                                                                                                                                                                                                                                                                                                                            |
| Development of hematopoietic system              | 2.06E-08 | -2.62 | IRF1,ITGAL,ICOS,RASGRP4,RASGRP1,IL2RG,GATA3,SYK,CXCR4,IL7R,IL2K,ITK,LAT,ZAP70,TR,GRAP2,CD3E,ITK,IKKBR,PI3K1,PRKIP1,ST1,CDKN1B,TRAT1,BAX,ETS1,FLT3LG,CBLB,CREB1,IFNG,RICTOR,IL2RB,PIK3R1,IKZF1,CCND3,LYN,STAT5A,CD3D,ITK,NCOR1,TRAF3IP3,NOTCH1,CD5,CD3G,SENP1,POCD1,THEM5,BCL2,RUNX3,SOCS1,PTPRC                                                                                                                                                                                                                                                                                                                                                                                                                                                                                                                                                                                                                                   |
| Maintenance of T lymphocytes                     | 5.39E-03 | -2.60 | GATA3,IL2,CXCR4,ICOS,IL7R,ITK,PIK3C3                                                                                                                                                                                                                                                                                                                                                                                                                                                                                                                                                                                                                                                                                                                                                                                                                                                                                              |
| Cell death of antigen presenting cells           | 7.00E-03 | -2.60 | GSK3H,EIF2AK2,FLT3LG,IRF1,MAPK34,IFNG,CDKN2A,STAT3,STING1,INPP5D,PIK3AP1,HMGB1,SG15,IL2,CCL5,GPR132,SMPD1,DPFA,IKKBR,PTGER4,OTC,RYR2,PARP1,CD40LG,SOAT1,TNFAIP3,CDKN1B,BCL2,CAMK2G,CASP3,BCL2L1,FA5,CASP8,STK4                                                                                                                                                                                                                                                                                                                                                                                                                                                                                                                                                                                                                                                                                                                    |
| Apoptosis of antigen presenting cells            | 7.01E-03 | -2.55 | GSK3H,EIF2AK2,FLT3LG,IRF1,MAPK34,IFNG,CDKN2A,STAT3,INPP5D,PIK3AP1,HMGB1,SG15,IL2,CCL5,GPR132,SMPD1,DPFA,PTGER4,CD40LG,SOAT1,TNFAIP3,CDKN1B,BCL2,CAMK2G,CASP3,BCL2L1,FA5,CASP8                                                                                                                                                                                                                                                                                                                                                                                                                                                                                                                                                                                                                                                                                                                                                     |

|                                               |          |       |                                                                                                                                                                                                                                                                                       |
|-----------------------------------------------|----------|-------|---------------------------------------------------------------------------------------------------------------------------------------------------------------------------------------------------------------------------------------------------------------------------------------|
| Proliferation of PBMCs                        | 1.39E-02 | -2.53 | KRAS,SH3BP1,IL2,SLIT1,IL2RB,PLA2G6,PIK3R1,CD6,PODC1,ANKA1,CD40LG,PDYN,BRAF,BCL2,ITK,BATF                                                                                                                                                                                              |
| Development of hematopoietic progenitor cells | 4.45E-08 | -2.50 | IRF1,ITGA,ICOS,RASGRP4,RASGRP1,IL2RG,GATA3,SYK,CXCR4,IL7R,LCK,IFITM1,LAT,ZAP70,CD3E,GRAP2,IL2,TCF7,IKBKB,IFM1,PRDM1,SH1,CDKN1B,TRAF1,BAK1,ETS1,FLT3LG,CBL,CHEB1,IRNG,RICTOR,IL2RB,PIK3R1,IKZF1,CCND3,PDYN,CD3D,STAT5A,ITK,NCOR1,TRAF3IP1,NOTCH1,CD3G,CD5,PODC1,THEMIS,BCL2,SOC1,PTPRC |
| Contact growth inhibition of lymphocytes      | 2.10E-05 | -2.45 | CDKN1B,LCK,PTPRC,ICP3,ZAP70,IKZF1                                                                                                                                                                                                                                                     |
| Transendothelial migration of T lymphocytes   | 9.99E-03 | -2.43 | CD47,ITK,RAC2,AQP3,CD44,ZAP70,MYH9                                                                                                                                                                                                                                                    |
| Proliferation of Th1 cells                    | 1.71E-03 | -2.43 | KLRD1,IL2,PARP1,CD40LG,ICOS,IFNG,CD6                                                                                                                                                                                                                                                  |
| Maturation of thymocytes                      | 5.98E-03 | -2.42 | CD3E,CXCR4,NOTCH1,LCK,DGKZ,PTPRC,CD247,RASGRP1                                                                                                                                                                                                                                        |
| Maturation of hematopoietic progenitor cells  | 1.84E-02 | -2.42 | CD3E,CXCR4,NOTCH1,LCK,PTPRC,DGKZ,CD247,RASGRP1,PHC1                                                                                                                                                                                                                                   |
| Cytolysis                                     | 2.45E-02 | -2.41 | HLA-A,LCK,KLRB1,GNLY,PRF1,PTPRC,SH2D1A,CD69                                                                                                                                                                                                                                           |
| Quantity of regulatory T lymphocytes          | 5.67E-05 | -2.40 | MAPK14,AKT3,TOB1,IFNG,ICOS,PRKCQ,RICTOR,IL2RB,PTPN22,MALT1,STAT3,STAT5A,IL7R,CD27,PTGD,RLTB,CYLD,CCR2,IL2,TRAF3IP3,TKNIP,MHP,TLN1,CD5,MAP3K14,IKBKB,GAMK4,PIK3FYVE,PODC1,CD69,THEMIS,PARP1,CD40LG,BATF,STAT5B,ICL1,STK4                                                               |
| Differentiation of effector T lymphocytes     | 6.76E-04 | -2.40 | IL2,STAT3,STAT4,DEF6,ICOS,CDKN1B,RICTOR,IL2RB,CD69                                                                                                                                                                                                                                    |
| Stimulation of lymphocytes                    | 1.92E-03 | -2.37 | SLAMF1,IFNG,ICOS,CD320,PIK3R1,PDYN,TLN1,LCK,ITK,IL1B,IR1,GRAP2,CD3E,IL2,PAK2,MIP,CD5,TNFSF14,SMAD2,KLRK1,PODC1,PTPRC,CD40LG,TNFAIP3,CDKN2B,PTPRC,FAS,CD2                                                                                                                              |
| Differentiation of naive lymphocytes          | 8.91E-03 | -2.37 | IL2,STAT4,IFNG,ICOS,PRKCQ,MAF,GATA3,MALT1,SYK,STAT3,CD40LG,DEF6,BATF,TRX21                                                                                                                                                                                                            |
| Cell cycle progression of leukocytes          | 3.82E-05 | -2.36 | KRAS,IL2,ITGA,ITG5,ATM,NABP1,CDKN2A,IKBKB,CD320,STAT3,CD40LG,INPP5D,NABP2,CDKN1B,BCL2,STAT5A,SOC1,BCL2L1,STAT5B,LAG3,SKIL                                                                                                                                                             |
| Cell movement of peripheral blood lymphocytes | 7.85E-03 | -2.31 | CD47,IL2,CXCR4,RGS1,CCL5,CLTC,PLCB3,RYB1,LCF1                                                                                                                                                                                                                                         |
| Quantity of TREG cells                        | 5.44E-03 | -2.30 | CCR2,IL2,IFNG,TLN1,ICOS,PRKCQ,RICTOR,IL2RB,GAMK4,PTPN22,PIK3FYVE,CD69,MALT1,STAT3,IL7R,BATF,CD27,STK4                                                                                                                                                                                 |
| Immune response of leukocytes                 | 2.65E-03 | -2.30 | FLT3LG,ITGAL,IFNG,PLA2G6,PIK3R1,KLRB1,FCER1G,HSD1L1,MALT1,DOCK8,SYK,F2R,STAT3,GRB1B,HMGB1,BSG15,IL7R,ITK,SLA2,CD27,ABCAT7,BRD2,IL2,BRD3,IKBKB,TIGIT,PODC1,TAPBP,CD69,CD44,NCR3,PCYARD,IBF2,CD47,PARP1,CD40LG,CDKN1B,ITGA4,BCL2L1,BAK,ETS1,FAS,SH2D1A,ERN1,PGAP3,TRX21,CASP8           |
| NK cell proliferation                         | 8.58E-07 | -2.28 | FLT3LG,IRF1,SLAMF1,ICOS,KLRB1,HECTD1,IL2RB,IL2RG,IKZF1,GATA3,STAT3,INPP5D,STAT5A,TOX,KAT7,SLAMF6,CD27,IL2,TCF7,PRF1,TAPBP,IBF2,TNFAIP3,SP3,SOC1,PTPRC,ETS1,STAT5B,TRX21                                                                                                               |
| Proliferation of CD4+ T-lymphocytes           | 3.24E-03 | -2.24 | IL2,S1,PR4,WBP2,ATG5,IFNG,TLN1,CD5,RICTOR,NDP1,RYB1,TIGIT,CD6,PODC1,CD69,PPA2D,STAT3,PARP1,BTN3A1,IL7R,ITK,BCLAF1,PTPRC,CYTD,EBH4                                                                                                                                                     |
| Polarization of T lymphocytes                 | 1.84E-02 | -2.24 | GSK3B,SLAMF1,STAT4,IFNG,ICOS,MSN,SMPD1,WIPF1,CD6,ICP1,MYH9,CXCR4,PDYN                                                                                                                                                                                                                 |
| Migration of mast cells                       | 2.12E-02 | -2.21 | MS4A4A,PDYN,CCL5,PIK3R1,BAC2                                                                                                                                                                                                                                                          |
| Recruitment of lymphocytes                    | 1.48E-02 | -2.21 | CCR2,IL2,MAPK14,GPR132,IFNG,CCL5,PRDX1,ITGA6,IL6,PCYARD,CD47,NRAS,CXCR4,CD8A,HMGB1,STAT5A,ETS1,FAS,S1,PR1                                                                                                                                                                             |
| Trafficking of leukocytes                     | 1.66E-02 | -2.21 | CCR2,CCL5,IFNG,TNFSF14,RAPI1B,ITGA4,EVL,AQP3,ANKA1,S1,PR1                                                                                                                                                                                                                             |
| Quantity of single positive thymocytes        | 9.37E-03 | -2.21 | RHOH,GRAP2,IL2,ATM,PPP3CB,ELK4,IL2RG,THEMIS,BCL2,IL7R,LCK,ITK,NMT2,LAG3,CD247,PRKD,CSTK4                                                                                                                                                                                              |
| Homeostasis of regulatory T lymphocytes       | 2.25E-03 | -2.20 | GATA3,IL2,ICOS,LAG3,TRX21                                                                                                                                                                                                                                                             |
| Cell death of phagocytes                      | 1.00E-02 | -2.20 | GSK3B,EIF2AK2,FLT3LG,IRF1,MAPK14,IFNG,CDKN2A,FCER1G,SYK,STING1,STAT3,CXCR4,INPP5D,PIK3AP1,HMGB1,BSG15,STAT5A,IL2,ANGPT2,CCL5,GPR132,SMPD1,DPFA,IKBKB,PTGER4,OGT,CD44,ANKA1,PCYARD,PARP1,SOAT3,CD40LG,TNFAIP3,CDKN1B,BCL2,CAMK2G,CASP3,SOC1,BCL2L1,BAK,FAS,CASP8,STK4,XIAP             |
| Differentiation of cytotoxic T cells          | 1.25E-02 | -2.19 | IL2,STAT3,CD8A,IL2RB,PRDM1,HSP90AA1                                                                                                                                                                                                                                                   |
| Cell viability of thymocytes                  | 2.45E-02 | -2.18 | IL2,CD3E,TCF7,RAIP9A,BCL2,ATM,BCL2L1,GIMAP1                                                                                                                                                                                                                                           |
| Stimulation of T lymphocytes                  | 2.50E-03 | -2.17 | SLAMF1,IFNG,ICOS,PIK3R1,PDYN,LCK,ITK,IL1B,IR1,CD3E,GRAP2,IL2,PAK2,MIP,CD5,TNFSF14,SMAD2,KLRK1,PODC1,PTPRC,CD40LG,TNFAIP3,CDKN2B,PTPRC,FAS,CD2                                                                                                                                         |



|                                                 |          |       |                                                                                                                                                                                                                                                                                                                                                                                                                                                                                                                                                                                                                                      |
|-------------------------------------------------|----------|-------|--------------------------------------------------------------------------------------------------------------------------------------------------------------------------------------------------------------------------------------------------------------------------------------------------------------------------------------------------------------------------------------------------------------------------------------------------------------------------------------------------------------------------------------------------------------------------------------------------------------------------------------|
| Expansion of helper T lymphocytes               | 3.61E-03 | -2.16 | IL2,PARP1,STAT3,CD40LG,ICOS,IFNG,IL7R,CD69,ICP1                                                                                                                                                                                                                                                                                                                                                                                                                                                                                                                                                                                      |
| Quantity of B-1 lymphocytes                     | 1.87E-02 | -2.11 | SEMA4D,CYLD,MS4A1,FLT3LG,KRAS,SMAD2,LY9,CD6,PDCD1,RAC2,IKZF1,GMAP1,MALT1,INPP5D,PIK3AP1,ARHGFP1,IL7R,PRKCB,FCMR,D,RRMD3,FAS                                                                                                                                                                                                                                                                                                                                                                                                                                                                                                          |
| Influx of Ca2+                                  | 3.56E-03 | -2.06 | PARP1,CXCR4,INPP5D,CCL5,DG1,STM2,CD5,ITK,LAT,ANT2,FAS,UNIB                                                                                                                                                                                                                                                                                                                                                                                                                                                                                                                                                                           |
| Cell movement of mast cells                     | 1.38E-02 | -2.04 | SEMA4D,GSX8,MS4A4A,FYN,CCL5,PIAU,RICTOR,PIK3R1,IL16,RAC2                                                                                                                                                                                                                                                                                                                                                                                                                                                                                                                                                                             |
| Proliferation of hematopoietic progenitor cells | 7.64E-05 | -2.03 | ATG5,ZBTB16,RICTOR,CDKN2A,HNRNP1,RASGRP1,IL2,RG,IKZF1,LPIN1,SYK,ARHGFP1,IL7R,LCK,ITK,TOX,ZAP70,LTB5,IPRI,CD3E,GRAP2,IL2,PAG1,NOTCH1,MAP3K14,IKKBL,LY9,TNF,FAIP3,DNAJ43,CDKN1B,BCL2,SOCS1,BCL2L1,CD2                                                                                                                                                                                                                                                                                                                                                                                                                                  |
| Cell cycle progression of lymphocytes           | 6.03E-05 | -2.01 | KRAS,IL2,ITGAL,ATG5,ATM,NABP1,CDKN2A,IKKBL,CD320,CD40LG,INPP5D,NABP2,CDKN1B,BCL2,STAT5A,BCL2L1,STAT5B,LAC3,SKIL                                                                                                                                                                                                                                                                                                                                                                                                                                                                                                                      |
| Proliferation of peripheral blood lymphocytes   | 1.12E-02 | -2.00 | SH3KBP1,IL2,BRAF,FYN,BCL2,BATE,ITK,PLA2G6,PIK3R1,CD6,PDCD1,ANXA1                                                                                                                                                                                                                                                                                                                                                                                                                                                                                                                                                                     |
| Activation of thymocytes                        | 5.25E-06 | -2.00 | CD3E,IL2,FYN,ITPKB,CD58,LCK,PTPN22,LAT,CD247,CD2,IL2RG                                                                                                                                                                                                                                                                                                                                                                                                                                                                                                                                                                               |
| Differentiation of natural killer T lymphocytes | 4.18E-03 | -2.00 | ZBTB16,AP3B1,ITK,SLAMF6,SH2D1A,IKZF1                                                                                                                                                                                                                                                                                                                                                                                                                                                                                                                                                                                                 |
| Chemotaxis of peripheral blood lymphocytes      | 1.04E-02 | -2.00 | IL2,CXCR4,CCL5,ICP1                                                                                                                                                                                                                                                                                                                                                                                                                                                                                                                                                                                                                  |
| Differentiation of effector helper T lymphocyte | 1.70E-02 | -2.00 | IL2,ICOS,RICTO,IL2,IL2RB                                                                                                                                                                                                                                                                                                                                                                                                                                                                                                                                                                                                             |
| Proliferation of thymocytes                     | 9.16E-06 | -1.99 | ZBTB16,RICTOR,HNRNP1,RASGRP1,IL2,RG,IKZF1,SYK,FYN,IL7R,LCK,ITK,TOX,ZAP70,LTB,IL2,CD3E,GRAP2,PAG1,NOTCH1,MAP3K14,IKKBL,LY9,TNF,FAIP3,DNAJ43,CDKN1B,SOCS1,CD2                                                                                                                                                                                                                                                                                                                                                                                                                                                                          |
| Apoptosis of phagocytes                         | 1.39E-02 | -1.99 | GSX8,EIF2AK2,FLT3LG,IRF1,MAPK14,IFNG,CDKN2A,FCER1G,SYK,STAT3,CXCR4,INPP5D,PIK3AP1,HMGB1,SG15,STAT5A,IL2,CCL5,GPR132,SMPD1,DFFA,PTGER4,ANXA1,SOAT1,CD40LG,TNF,FAIP3,CDKN1B,CAMK2G,BCL2,CASP3,SOCS1,BCL2L1,BAK,FAS,CASP8,XKR8                                                                                                                                                                                                                                                                                                                                                                                                          |
| Clearance of cells                              | 1.08E-03 | -1.98 | PPARD,CCR2,HMGB1,GPR132,IFNG,CD44,XKR8,ANXA1                                                                                                                                                                                                                                                                                                                                                                                                                                                                                                                                                                                         |
| Polarization of Th1 cells                       | 1.04E-02 | -1.98 | STAT4,ICOS,IFNG,CD6                                                                                                                                                                                                                                                                                                                                                                                                                                                                                                                                                                                                                  |
| Homeostasis of TREG cells                       | 1.04E-02 | -1.98 | GATA3,IL2,ICOS,ITK21                                                                                                                                                                                                                                                                                                                                                                                                                                                                                                                                                                                                                 |
| Survival of natural killer T lymphocytes        | 1.70E-02 | -1.96 | CYLD,ELF1,BCL11,IL2RG                                                                                                                                                                                                                                                                                                                                                                                                                                                                                                                                                                                                                |
| Proliferation of B lymphocytes                  | 5.32E-06 | -1.96 | RBL2,PLEKHAZ,CDKN2A,CD320,RASGRP1,IL2,RG,MALT1,LPIN1,SYK,ARHGFP1,PIK3AP1,PCYTT1,ATXN,IL7R,PRKCB,IRL,PD1M,LAC3,S1PR1,CD3E,IL2,SH3KBP1,CCND2,EZK,IKKBL,PIM1,PRDM1,CDKN1B,CASP3,BCL2L1,STAT5B,ETS1,FAS,IRN1,FLT3LG,SEMA4D,IFNG,CREB1,IL2,RR,WIP1,PIK3R1,CD6,IKZF1,ICP1,CCND3,LY96,FYN,INPP5D,STAT5A,MS4A1,SGORR,KRAS,MYBL1,STM2,MARK2,ATM,MAP3K14,NABP1,EFP300,LY9,PDCD1,CD44,GMAP1,IRF2,CD40LG,NABP2,TNF,FAIP3,ARHGFP1,BCL2,ACLY,PTPRC,PGAP3,CASP8                                                                                                                                                                                     |
| Cytotoxicity of T lymphocytes                   | 5.62E-04 | -1.96 | IL2,STAT4,NOTCH1,IFNG,CCL5,ATG5,PRF1,KLRK1,HLA-F,IL2RB1,HLA-A,CD40LG,G2M,PTFR,CBLB,PTPRC,FAS,XCL1,CD27                                                                                                                                                                                                                                                                                                                                                                                                                                                                                                                               |
| Development of body trunk                       | 1.33E-09 | -1.93 | IRF1,CBFL,ITGAL,CREB1,RASGRP4,RICTOR,IL2RB,PLA2G6,RASGRP1,IL2,RG,IKZF1,GATA3,SYK,CXCR4,CD3D,STAT5A,IL7R,LCK,ITK,NCOR1,LAT,ZAP70,GRAP2,CD3E,IL2,TRAF3IP3,NOTCH1,CD3G,CD5,IKKBL,PIM1,PDOD1,THEMIS,ST1,CDKN1B,TRAT1,BCL2,SOCS1,PTPRC,BAK,ETS1                                                                                                                                                                                                                                                                                                                                                                                           |
| Cell movement of hematopoietic progenitor cells | 1.98E-02 | -1.90 | CCR2,DCCR8,CXCR4,IGS1,CCL5,HNRNP1,CD69,STK4,S1PR1,ICP1                                                                                                                                                                                                                                                                                                                                                                                                                                                                                                                                                                               |
| Inhibition of leukocytes                        | 2.29E-06 | -1.87 | IL2,AKT3,IFNG,KLRB1,EFP300,SMPD1,PTGER4,CD6,PIM1,PDOD1,GATA3,PARP1,STAT3,HLA-A,FKBP5,CLEC2D,ITGA4,CBLB,DGKZ,TNFRSF18,TRIB21                                                                                                                                                                                                                                                                                                                                                                                                                                                                                                          |
| Quantity of CD4+ T lymphocytes                  | 4.33E-10 | -1.83 | IRF1,ITGAL,T0B1,ICOS,PRKCQ,CDKN2A,FCER1G,PRKACB,RASGRP1,STARBD7,MALT1,D,DOCK8,STING1,STAT3,ARHGFP1,PIK3AP1,LCK,PRKCB,LAT,PRKCH,ASML1,LAC3,ZAP70,CYLD,GRAP2,CD3E,IL2,CCL5,PRF1,IKKBL,CD69,PPARD,ST1,BATE,GNLY,ETS1,STK17B,STK4,SEMA4D,BHOH,IFNG,ZBTB20,HL3RA1,IL2,RR,PTPN22,ND,PRF1,RAC2,ELK4,FYN,CD3D,ITK,TOX,SLAMF6,PTGD,RRAS,CCR2,GPR132,CD5,ATM,MSN,MAP3K14,SLA,PDOD1,PVCARD,THEMIS,PARP1,HLA-A,CD40LG,BCL2,PTPRC,TNIP1,CD247,SH2D1A,TRIB21,CASP8                                                                                                                                                                                 |
| Cell movement of peripheral T lymphocyte        | 5.39E-03 | -1.82 | CD47,CXCR4,IGS1,CCL5,PLCE3,PYB1,LCP1                                                                                                                                                                                                                                                                                                                                                                                                                                                                                                                                                                                                 |
| Apoptosis of macrophages                        | 1.28E-02 | -1.75 | EIF2AK2,IRF1,MAPK14,CCL5,GPR132,IFNG,DFPA,CDKN2A,STAT3,INPP5D,SOAT1,PIK3AP1,HMGB1,BCL2,SG15,CAMK2G,CASP3,BCL2L1,FAS,CASP8                                                                                                                                                                                                                                                                                                                                                                                                                                                                                                            |
| Activation of T lymphocytes                     | 2.52E-13 | -1.74 | NCOR2,ICOS,NCF1,FCER1G,RASGRP1,IL2,RG,HMGB1,LCK,PRKBL,LAT,TRAF1,SRPG,LAG3,NCK1,IL2,TIM1,DJL1,CD46,AX1,PTGER4,PRDM1,KLRD1,CD47,ST1,RTN3A1,BCLAF1,AZ2,BCL2L1,BAK,STAT5B,FAS,ETS1,FLT3LG,SLAMF1,IFNG,PTPN22,NDFP1,FYN,ITPKB,STAT5A,DGKZ,SLA2,CD27,CCR2,STAT4,MIP,NOTCH1,BCL11,ICD5,CD58,CD3G,CAMK4,KLR1,PPP3CA,PCYARD,HLAA,CD40LG,CD7,G2M,BCL2,VTI1B,TNFRSF1B,CD2,AINAK,ITGAL,ATG5,PRKAA1,PRKCQ,RAI29,MALT1,STAT3,AN06,FUT8,CBLB,ZAP70,NR4A2,CD3E,PAG1,CCL5,PRF1,SMF1,PIK3R1,IKKBL,IKKBL,SH2D2A,ANXA1,CDKN1B,HSF1,SEMA4D,MAPK14,PIK3IP1,TNF,FAIP3,IL2,IL2RB,CD6,DEP6,ITK,MAPK14,PPP3CRT,IGT,PDOD1,CD44,SOCS1,PTPRC,CD247,CASP8,TRC1D10C |

|                                             |          |       |                                                                                                                                                                                                                                                                                                                 |
|---------------------------------------------|----------|-------|-----------------------------------------------------------------------------------------------------------------------------------------------------------------------------------------------------------------------------------------------------------------------------------------------------------------|
| Production of lymphocytes                   | 1.98E-02 | -1.68 | ARID4,GATA3,CD40LG,FYN,NOTCH1,RRB2,IL2RB,ITGA4,ETS1,TRX21                                                                                                                                                                                                                                                       |
| Production of leukocytes                    | 1.55E-02 | -1.68 | ARID4,PLT3LG,GATA3,CD40LG,NP5D,FYN,NOTCH1,RRB2,IL2RB,ITGA4,ETS1,TRX21                                                                                                                                                                                                                                           |
| Binding of B lymphocytes                    | 1.14E-02 | -1.67 | CD47,IL2,CXCR4,ITGAL,RS1,RAPI1,ITGA4,SH2D1,AJMD16,KAP2A                                                                                                                                                                                                                                                         |
| Proliferation of alpha-beta T lymphocytes   | 1.25E-02 | -1.67 | CD3L,CCR2,SYK,CBLB,PTPRC,ZAP70                                                                                                                                                                                                                                                                                  |
| Quantity of follicular B lymphocytes        | 7.72E-03 | -1.67 | ICOS,PTFN22,WIPF1,IKZF1,IKZF1,MALT1,DOCK8,STAT3,PIK3AP1,ITK,N48P1,TLK4,ITK,CYLD,KRAS,IL2,MAP3K14,EP300,PRDM1,GIMAP1,CD40LG,RS1,ARHGEP1,BCL2,DOCK11,RAPI1B,FCMR,FAS,SH2D1A,CASP8,STK4,EP515                                                                                                                      |
| Migration of peripheral blood lymphocytes   | 1.31E-02 | -1.66 | CD47,CXCR4,RS1,CCL5,CITC,PLCE3,ICP1                                                                                                                                                                                                                                                                             |
| Inhibition of lymphocytes                   | 2.12E-05 | -1.65 | IL2,AKT3,KLRB1,SMFD1,EP300,PTGER4,PI3K,CD6,PODC1,GATA3,PARP1,HLA-A,CLEC2D,CBLB,DGKZ,TNFRSF18,TRX21                                                                                                                                                                                                              |
| Selection of T lymphocytes                  | 5.81E-07 | -1.64 | RHOH,CD3E,TRAF3IP3,ATG5,PRKQ,ELK4,ELK1,THEM5,GATA3,ELF1,STT1,ITPR8,TRAT1,CD3D,LCK,ITK,TOX,PTPRC,PRKCH,FAS,ZAP70                                                                                                                                                                                                 |
| Migration of effector memory T lymphocytes  | 2.10E-05 | -1.63 | ICOS,ITGAL,ITGA4,ZAP70,MV19,S1PR1                                                                                                                                                                                                                                                                               |
| Activation of PBMCs                         | 1.68E-02 | -1.63 | IL2,IY96,C18C2D,IRNG,SOC51,CD6                                                                                                                                                                                                                                                                                  |
| Inflammatory response of leukocytes         | 1.69E-02 | -1.63 | STAT3,F2R,IFNG,BRD3,ETS1,ERN1,BRD2                                                                                                                                                                                                                                                                              |
| Formation of lymphoid tissue                | 8.23E-09 | -1.63 | NCOB2,IRF1,CBFB,ITGAL,CREB1,BASGP4,ICTOR1,IL2RB,RASGRP1,IL2RB,IKZF1,GATA3,DOCK8,SYK,CXCR4,CD3D,IL7R,LCK,ITK,NCOB1,LAT,ZAP70,CD3E,GRAP2,IL2,TRAF3IP3,NOTCH1,CD3G,CD5,IKK8B,PI3K,PODC1,THEM5,NCSTN,STT1,CDKN1B,TRAT1,BCL2,SOC51,PTPRC,BAK,ETS1                                                                    |
| Formation of thymocytes                     | 1.49E-09 | -1.60 | IRF1,CBFB,ITGAL,CREB1,BASGP4,ICTOR1,IL2RB,RASGRP1,IL2RB,IKZF1,GATA3,SYK,CXCR4,CD3D,IL7R,LCK,ITK,NCOB1,LAT,ZAP70,CD3E,GRAP2,IL2,TRAF3IP3,NOTCH1,CD3G,CD5,IKK8B,PI3K,PODC1,THEM5,STT1,CDKN1B,TRAT1,BCL2,SOC51,PTPRC,BAK,ETS1                                                                                      |
| Activation of cytotoxic T cells             | 2.33E-04 | -1.57 | MALT1,CCR2,CD40LG,IFNG,GZMA,PRF1,SMFD1,IFITM1B,FAS,CD247,ZAP70                                                                                                                                                                                                                                                  |
| Suppression of leukocytes                   | 2.46E-05 | -1.56 | IL2,AKT3,IFNG,SMFD1,EP300,PI3K,CD6,PODC1,GATA3,PARP1,STAT3,PRKPS,CBLB,DGKZ,TNFRSF18,TRX21                                                                                                                                                                                                                       |
| Cell movement of CD4+ T lymphocytes         | 9.88E-03 | -1.55 | STAT3,CXCR4,BATF,ITK,NR1H2,LAG3,PODC1,RAC2,AQP3                                                                                                                                                                                                                                                                 |
| Inflammation of organ                       | 2.33E-03 | -1.53 | NCOB2,IFNG,ZNF331,SELENOK,FCER1G,PDDE4H,HSF2,STAT3,CXCR4,CD18A,HLA-DQB5,ITK,ISG20,NR4A2,PPP2C5A1,PR1,STAT4,ERN1,MIB1,NOTCH1,STIM2,SMAD2,EP300,IKK8B,PRDM1,PODC1,RABGAP1,LDISP2,CD40LG,TNFAIP3,PHF1,BCL2,FAS,TRX21,AHNAK,UNCB                                                                                    |
| Cell death of macrophages                   | 1.48E-02 | -1.51 | EIF2AK2,IRF1,MAPK14,IFNG,CDKN2A,STAT3,STING1,NP5D,PIK3AP1,HMG1B,ISG15,CCL5,GPR132,DFFA,OGT,PPICARD,PARP1,SOAT1,TNFAIP3,BCL2,CANX2,G,CASP3,BCL2L1,JAS,CASP8,STK4                                                                                                                                                 |
| Quantity of follicular T helper cells       | 7.85E-03 | -1.49 | MALT1,IL2,STAT3,IFNG,ICOS,PRDM1,MAF,TGIT,SH2D1A                                                                                                                                                                                                                                                                 |
| Proliferation of activated T lymphocytes    | 6.77E-03 | -1.49 | IL2,SLAMF1,ITGAL,NOTCH1,PRKQ,PRDM1,PPICARD,FYN,HMG1B,BTN3A1,CDKN1B,BCL2,STAT5A,TRAF1,STAT5B                                                                                                                                                                                                                     |
| Cell-cell contact                           | 2.11E-02 | -1.48 | F1R1,ITGAL,CCL5,ICOS,MAP3K14,CD44,CXCR4,SYK,CD40LG,ADGRE5,ITGA4,TNIP1,PTPRC                                                                                                                                                                                                                                     |
| Proliferation of helper T lymphocytes       | 8.91E-03 | -1.46 | IL2,IFNG,ICOS,PTFN22,CD6,CD69,KLRD1,GATA3,PARP1,STAT3,CD40LG,IL7R,SOC51,STAT5B                                                                                                                                                                                                                                  |
| Response of bone marrow-derived macrophages | 1.62E-02 | -1.43 | F2R,IFNG,BRD3,PRKAA1,PLCB3,SOC51,ERN1,BRD2                                                                                                                                                                                                                                                                      |
| Accumulation of leukocytes                  | 1.49E-02 | -1.41 | IRF1,ITGAL,PAFAH1B1,PLAU,ICOS,PRKQ,NCF1,CARD9,RASGRP1,IL2RB,DOCK8,STAT3,PIK3AP1,HMG1B,PNPLA2,LAT,S1PR1,IL2,CCL5,TLN1,IKK8B,SH2D2A,BAD,PPAR,RAF,ADGRE5,ITGA4,FAS,STK4,FLT3LG,IFNG,TNFAIP8,IL2RB,ITGA1,NP5D,TS2D3,DEF6,STAT5A,CD27,KRAS,CCR2,ANGPT2,NOTCH1,CD99,CD44,MMMP7,IP6K1,BCL2,MAPK13,RUNX3,TNFRSF18,CASP8 |
| Cell survival of T lymphocytes              | 2.74E-05 | -1.41 | IL2,DEF6,PI3K,IL2RG,PPICARD                                                                                                                                                                                                                                                                                     |
| Differentiation of alpha-beta T lymphocytes | 5.98E-03 | -1.40 | SYK,BRAF,NOTCH1,ITPKB,BCL11B,NKAP2AP70,ANXA1                                                                                                                                                                                                                                                                    |

|                                             |          |       |                                                                                                                                                                                                    |
|---------------------------------------------|----------|-------|----------------------------------------------------------------------------------------------------------------------------------------------------------------------------------------------------|
| Migration of peripheral T lymphocyte        | 4.18E-03 | -1.39 | CD47,CXCR4,RGS1,CCL5,PLCE3,LLCP1                                                                                                                                                                   |
| Hematologic cancer of cells                 | 6.11E-03 | -1.39 | GSK3B,MSA41,CD3E,PAG1,NOTCH1,BUB3,PKC3R1,PIW1,POCD1,PARP1,HTC2,NRAS,CD40LG,HPK3,BCL2,STAT5A,NIBAN1,FCMR,BCL2L1,STAT5B,FASCASP8                                                                     |
| Movement of CD4+ T-lymphocytes              | 1.18E-02 | -1.38 | IFNG,CCL5,NR1H2,POCD1,AC2A,QF3,CD69,LCPI,STAT3,CXCR4,ITK,BATF,LAG3                                                                                                                                 |
| Selection of thymocytes                     | 2.86E-07 | -1.37 | CD3E,RH0H,TRAF3IP3,ATG5,PRKQ,ELK4,ELK1,THEMISG,ATA3,SIT1,TRAT1,ITPK8L,CKC3D3,ITK,TOX,PTPRC,PRKCH,FASZAP70                                                                                          |
| Apoptosis of hematopoietic progenitor cells | 3.24E-03 | -1.35 | IFNG,CDKN2A,JI1-2,FYNT,SC22D3,LOK,PRKDC,TLK4,DUSP4,ITB,CYL,CD3EJL2,NOTCH1,RAP1G,DS1,BCL11B,ATM,DFFA1,IKKB,BAD,ZC3H8,PARP1,MAP3K2,GZMA,BCL2,ARHGFP1,BIRC6,CASP3,PTPRC,BAX,BCL2L1,ETS1,FASCASP8,XXR8 |
| Shape change of lymphocytes                 | 1.51E-02 | -1.35 | SEM4D,ITGAL,INPP5D,ICOS,SMFD1,RAP1B,FYB1,CD44,MYH9                                                                                                                                                 |
| Survival of CD4+ T-lymphocytes              | 2.25E-03 | -1.34 | PIM1,CASP8,IL2RG,GIMAP1,PVCARD                                                                                                                                                                     |
| Expression of protein                       | 8.99E-03 | -1.34 | IL2,SYK,IFNG,LOK,PRKAA1,FAS                                                                                                                                                                        |
| Positive selection of thymocytes            | 1.05E-07 | -1.32 | RH0H,TRAF3IP3,PRKQ,ELK4,ELK1,THEMIS,IT1,TRAT1,LOK,ITK,TOX,PRKCH,PTPRC                                                                                                                              |
| Cytotoxic T lymphocyte response             | 3.62E-05 | -1.31 | IL2,PARP1,CD8A,IFNG,BAX,SH2D1A,HSDL1,PVCARD                                                                                                                                                        |
| Inhibition of mononuclear leukocytes        | 4.24E-06 | -1.31 | IL2,AKT3,IFNG,KLRB1,EP300,SMFD1,PTGER4,CD6,PIM1,POCD1,GAT3,PARP1,JI1A-A,CLEC2D,ITGA4,CBL,LDGKZ,TNFRSF18,TBX21                                                                                      |
| Activation of B lymphocytes                 | 2.76E-03 | -1.30 | SEM4D,FLT3LG,TNFAIP8L2,IFNG,PLEKHA2,IL2RB,TAB2,RASGRP1,MALT1,STK,STING,INPP5D,CLEC2D,PPP2R3C,TYLNA,PRKCB,ZAP70,MS4A1,SH3KBP1,JI1L2,LAX1,POCD1,CD40LG,TNFAIP3,FASCASP8,TCB1D10C                     |
| Differentiation of T <sub>H</sub> 2 cells   | 2.28E-03 | -1.28 | IRF1,JI1L2,MAPK14,STAT4,IFNG,CCL5,ICOS,PRKQ,RICTOR,S0CS2,GATA3,CDKN1B,STAT5A,ITK,BATF,CBLB,SH2D1A,PGAP3,TBX21                                                                                      |
| Transcription of RNA                        | 3.61E-03 | -1.28 | IL2,INPP5D,IFNG,MAP3K14,GTTF2,IKKB,CREBBP,MAF,ZAP70                                                                                                                                                |
| Inhibition of T lymphocytes                 | 7.63E-05 | -1.26 | IL2,AKT3,SMFD1,EP300,PTGER4,PIM1,CD6,POCD1,GATA3,PARP1,JI1A-A,CBLB,DGKZ,TNFRSF18,TBX21                                                                                                             |
| Interaction of CD4+ T-lymphocytes           | 6.68E-03 | -1.25 | CXCR4,IL7R,FYB1,ANXA1,SKAP1                                                                                                                                                                        |
| Emigration of T lymphocytes                 | 2.56E-02 | -1.21 | CXCR4,IFNG,STK4,S1PR1                                                                                                                                                                              |
| Quantity of intraepithelial T lymphocytes   | 8.59E-05 | -1.20 | IRF1,LOK,IL7R,PTPRC,TAP1,IL2RG,IKZF1                                                                                                                                                               |
| Maturation of natural killer T lymphocytes  | 1.03E-02 | -1.19 | ELF1,JI1L7R,ITK,DGKZ,TBX21                                                                                                                                                                         |
| Differentiation of regulatory T lymphocytes | 2.54E-02 | -1.18 | DUSP10,CCR2,JI1L2,MAPK14,ICOS,SMAD2,PRKQ,CD46,MAF,CD69,STAT3,ITK,S0CS1,NCOR1,TNFRSF18,S1PR1                                                                                                        |
| Immune response of T lymphocytes            | 3.54E-03 | -1.16 | FLT3LG,IFNG,ICOS,HS1L1,MALT1,DOCK8,STAT3,IL7R,ITK,CD27,JI1L2,IKKB,TIGIT,POCD1,TAPBP,CD69,PVCARD,PARP1,CDKN1B,BAX,BCL2L1,ETS1,SH2D1A,PGAP3,TBX21,CASP8                                              |
| Mitogenesis of lymphocytes                  | 1.03E-02 | -1.15 | STAT3,STAT4,IL7R,CDKN2A,IKKB                                                                                                                                                                       |
| Exposure of phosphatidylserine              | 2.56E-02 | -1.15 | HMGB1,ANOK,FAS,XXR8                                                                                                                                                                                |
| Nephritis                                   | 4.25E-02 | -1.13 | NCOR2,CD40LG,CD8A,IFNG,BCL2,EP300,FAS,RABGAP1L,PPP2CA,SG20                                                                                                                                         |
| Glomerulonephritis                          | 4.92E-02 | -1.13 | NCOR2,CD40LG,IFNG,BCL2,EP300,FAS,RABGAP1L,SG20,PPP2CA                                                                                                                                              |
| Expansion of B lymphocytes                  | 8.60E-04 | -1.13 | SIGIRR,CCND2,MYBL1,LY9L,LCPI,CCND3,TNFAIP3,BCL2,STAT5A,IL7R,BCL2L1,STAT5B,LAG3,S1PR1                                                                                                               |

|                                                          |          |       |                                                                                                                                                                                                                                                                                                                                                                                                                                                                                                                                                                                                                                                                                                        |
|----------------------------------------------------------|----------|-------|--------------------------------------------------------------------------------------------------------------------------------------------------------------------------------------------------------------------------------------------------------------------------------------------------------------------------------------------------------------------------------------------------------------------------------------------------------------------------------------------------------------------------------------------------------------------------------------------------------------------------------------------------------------------------------------------------------|
| Quantity of plasma cells                                 | 1.58E-02 | -1.11 | FLT3LG,IL2,ANGPT2,FNG,ICOSJL2RB,PRDM1,PDCC1,RAC2,RASGRP1,IL2RG,RGS1JL7R,PRKCB,FCMR,ETS1                                                                                                                                                                                                                                                                                                                                                                                                                                                                                                                                                                                                                |
| Cell spreading of lymphocytes                            | 1.31E-02 | -1.09 | ITGAL,NP95D,ICOS,SMFD1,RAP1B,FYB1,CD44                                                                                                                                                                                                                                                                                                                                                                                                                                                                                                                                                                                                                                                                 |
| Accumulation of dendritic cells                          | 1.25E-02 | -1.09 | FLT3LG,DOCK8,CCR2,DEF6,CD99,RUNX3                                                                                                                                                                                                                                                                                                                                                                                                                                                                                                                                                                                                                                                                      |
| Degranulation of leukocytes                              | 3.66E-03 | -1.08 | FTL,RASGRP1,FCER1G,RASGRP1,STK10,STING1,HMGB1,LAT,LAG3,18FG,QSOX1,LAGP,AT2,IL2LX1,CD47,AGANRRASVIF,ARM3B,COPB1,RAP1B,STAT5B,ETS1,CYBA,SPTAN1,IRN,NBNEAL2,PTPN22,WIPF1,RAB6A,B4GALT1,PTPN4,FYN,HUWEL1,SPAB,STAT5A,DGKZ,GSTP1,ATP9A1,PYGL,CD58,GYG1,PCYARD,VT11B,RAB27A,ORMDL3,1QC,AP1,ITGAL,PLAU,HSP90A1,ARHGAP45,DOX3L,LPIN1,SYK,CD63,AN06,GPI,RAB37,DYNCH11,GHDC,PRF1,MGST1,TMEM30A,ANXA1,LDNAJ,C3,RAB5B,ADGRE5,PSMD1,MAPK14,CAB39,VAMP2,IL1B,ITSPAN1,4,RAC2,TM6,UBR4,NP95D,CPNE1,ITK,SLAMF6,PSMD2,HSP90A1,PTGDR,PAFAH1B2,PAK2,SEK1,NB6A,PI3M1,PDCC1,CD44,KCNS1,NSTN,IST2,TNFAIP5,ALX1,PTPRC,GAND1,TBC1D10C                                                                                           |
| Accumulation of mononuclear leukocytes                   | 8.22E-04 | -1.08 | ITGAL,TNFAIP8L2,JFNG,ICOS,PRKQJL2RB,CARD9,RASGRP1,IL2RG,ITGAI,STAT3,TSC22D3,DEF6,PK3AP1,STAT5A,LAT,CD27,S1PR1,KRAS,CCR2,IL2,CCL5,NOTCH1,TLNL1,CD99,IKKKB,SH2D2A,BAD,PPARD,BRAF,BCL2,RUNX3,TNFRSF18,FAS,CASP8,STK4                                                                                                                                                                                                                                                                                                                                                                                                                                                                                      |
| Killing of leukocytes                                    | 1.40E-03 | -1.08 | IL2,SLAMF1,MAPK14,JFNG,PRF1,LV9,CD47,HLA-A,SLAMF6,BAX,RAB27A,FAS,SH2D1A                                                                                                                                                                                                                                                                                                                                                                                                                                                                                                                                                                                                                                |
| Egression of T lymphocytes                               | 1.70E-02 | -1.07 | CCR2,ITGAL,RAC2S1PR1                                                                                                                                                                                                                                                                                                                                                                                                                                                                                                                                                                                                                                                                                   |
| Glycolysis                                               | 7.89E-03 | -1.06 | IL2,TRAF3IP3,CRDM,CRBN,JFNG,PLEKHA2,EPAS1,PI3M1,GSTP1,PIK3R1,PDCC1,ANXA1                                                                                                                                                                                                                                                                                                                                                                                                                                                                                                                                                                                                                               |
| Differentiation of CD4+ T lymphocytes                    | 3.66E-03 | -1.03 | MAPK14,JFNG,ICOS,PRKQ,NDPIP1,CARD9,CD6,MAL1,STAT3,CD8A,DEF6,STAT5A,ITK,TOX,NR4A2,CCR2,IL2,STAT4,DNAB1,SMAD2,MAP3K14,SOC2,MAF,PRDM1,CD69,RORA,SH2D2A,USP15,BATF,TNFRSF10,ETS1,TBX21                                                                                                                                                                                                                                                                                                                                                                                                                                                                                                                     |
| Activation of peripheral blood lymphocytes               | 1.70E-02 | -1.00 | IL2,CLEC2D,SOC1,CD6                                                                                                                                                                                                                                                                                                                                                                                                                                                                                                                                                                                                                                                                                    |
| Inflammatory response of bone marrow-derived macrophages | 2.56E-02 | -1.00 | F2R,BRD3,ERN1,BRD2                                                                                                                                                                                                                                                                                                                                                                                                                                                                                                                                                                                                                                                                                     |
| Activation-induced cell death of T lymphocytes           | 2.12E-05 | -0.99 | IL2,SLG6A6,JFNG,CREB1,CD5,PRF1,RAC2,CD44,DNAAJ3,TSC22D3,MAP3K2,BCL2,ITK,CASP3,BCL2L1,FAS,CASP8                                                                                                                                                                                                                                                                                                                                                                                                                                                                                                                                                                                                         |
| Lymphocytic cancer                                       | 6.16E-03 | -0.97 | GSK3B,PIK3R1,BTG2,HIPK3,STAT5A,NIBAN1,CD27,MS4A1,CD3E,PAG1,NOTCH1,BUB3,PRF1,PI3M1,PDCC1,CD47,PARP1,NRAS,CD40LG,BCL2,CASP3,FCMR,BCL2L1,STAT5B,FAS,CASP8                                                                                                                                                                                                                                                                                                                                                                                                                                                                                                                                                 |
| Suppression of T lymphocytes                             | 3.72E-04 | -0.95 | IL2,AKT3,SMFPD1,EP300,PI3M1,CD6,PDCC1,GATA3,PARP1,CBLR,DGKZ,TNFRSF18,TBX21                                                                                                                                                                                                                                                                                                                                                                                                                                                                                                                                                                                                                             |
| Expansion of hematopoietic progenitor cells              | 5.98E-03 | -0.94 | SYK,ZBTB16,TOX,BCCL2L1,LV9,ZAP70,S1PR1,KZF1                                                                                                                                                                                                                                                                                                                                                                                                                                                                                                                                                                                                                                                            |
| Activation of CD4+ T lymphocytes                         | 1.54E-03 | -0.94 | IL2,JFNG,TLN1,ATG5,CD46,CAMK4,NDPIP1,PTPN22,CD6,PRDM1,STAT3,HLA-A,PRKCB,AZI2,BCLAF1,DGKZ,CD27,CASP8                                                                                                                                                                                                                                                                                                                                                                                                                                                                                                                                                                                                    |
| Killing of lymphocytes                                   | 7.54E-03 | -0.93 | CD47,IL2,SLAMF1,HLA-A,PRF1,SLAMF6,RAB27A,LV9,FAS,SH2D1A                                                                                                                                                                                                                                                                                                                                                                                                                                                                                                                                                                                                                                                |
| Expression of RNA                                        | 1.33E-03 | -0.90 | CD47,IL2,NP95D,JFNG,BATF,MAP3K14,GT,F2L,IKKKB,CRBB,MAP3K14,ZAP70                                                                                                                                                                                                                                                                                                                                                                                                                                                                                                                                                                                                                                       |
| Accumulation of lymphocytes                              | 1.23E-03 | -0.89 | ITGAL,TNFAIP8L2,JFNG,ICOS,PRKQJL2RB,CARD9,RASGRP1,IL2RG,STAT3,TSC22D3,DEF6,STAT5A,LAT,CD27,S1PR1,KRAS,IL2,CCL5,NOTCH1,TLNL1,CD99,IKKKB,SH2D2A,BAD,PPARD,BRAF,BCL2,RUNX3,TNFRSF18,FAS,CASP8,STK4                                                                                                                                                                                                                                                                                                                                                                                                                                                                                                        |
| Maturation of invariant natural killer T cells           | 1.04E-02 | -0.88 | ELF1,IL17R,ITK,DGKZ                                                                                                                                                                                                                                                                                                                                                                                                                                                                                                                                                                                                                                                                                    |
| Survival of CD8+ T lymphocyte                            | 2.25E-03 | -0.88 | IL7R,FAS,CASP8,PIK3C3,GIMAP1                                                                                                                                                                                                                                                                                                                                                                                                                                                                                                                                                                                                                                                                           |
| Function of leukocytes                                   | 7.14E-08 | -0.87 | IRF1,AKAP13,ICOS,CD85,RASGRP1,FCER1G,IL16,RASGRP1,IL2RG,STK10,LAT,LAG3,S1PR1,IL2,TNIP,DLG1,LAN1,PTTGER4,DUSP2,7,APP,PTGER2,ASH2,BCL2L1,FCMR,STAT5B,NTAN1,ETS1,STK4,FLT3LG,SLAMF1,CRB1,JFNG,DOCK2,PTPN22,WIPF1,TAP1,B4GALT1,LCP1,PTN,STAT5A,DGKZ,SLA2,CD27,CCR2,STAT4,CD3C,FYB1,ABCCL1,PCARD,PARP1,H1AA,CD40LG,GZMA,BCL2,ARHGAP3,TBX21,AHNAK,ITGAL,PLAU,PRKQ,CARD9,MCPH1,MALT,DOCK8,STAT3,ARHGAP6,CDBA,CBLR,DUSP4,PIK3C3,IL18R1,LYLD,CD3E,CCL3,PRF1,SMFD1,PI3M1,PTSP1,LIJ,ST,CD69,BAD,GSK3B,GIMAP4,P11R,TNFAIP8L2,KL,RB1JL13R,A1,SELENOK,PIK3R1,LV96,NP95,DJTK,SLAMF6,M4B1,PRKDC,HSP90A1,PTGDR,GADD45G,SGIR,CRBB,TA11B1,TNFSF14,ATM,PPP3CB,SLA,PDCC1,CD44,CD96,MM7,RGS1,S0CS1,PTPRC,CD247,SH2D21A,CASP8 |
| Hematologic cancer                                       | 7.01E-03 | -0.86 | GSK3B,CDKN2A,PIK3R1,STAT3,BTG2,HIPK3,STAT5A,NIBAN1,CD27,MS4A1,CD3E,PAG1,NOTCH1,BUB3,PRF1,PI3M1,PDCC1,CD47,PARP1,NRAS,CD40LG,BCL2,CASP3,FCMR,BCL2L1,STAT5B,FAS,CASP8                                                                                                                                                                                                                                                                                                                                                                                                                                                                                                                                    |
| Accumulation of T lymphocytes                            | 2.43E-04 | -0.85 | ITGAL,JFNG,ICOS,PRKQJL2RB,CARD9,RASGRP1,IL2RG,STAT3,DEF6,STAT5A,LAT,CD27,S1PR1,KRAS,IL2,CCL5,NOTCH1,TLNL1,CD99,IKKKB,SH2D2A,PPARD,BRAF,BCL2,RUNX3,FAS,CASP8,STK4                                                                                                                                                                                                                                                                                                                                                                                                                                                                                                                                       |
| Synthesis of carbohydrate                                | 8.99E-03 | -0.85 | INPP5D,PCYT1A,PTPRC,PLA2G6,PIK3R1,ANXA1                                                                                                                                                                                                                                                                                                                                                                                                                                                                                                                                                                                                                                                                |
| Synthesis of phosphatidic acid                           | 1.51E-02 | -0.85 | INPP5D,PCYT1A,PLA2G6,PIK3R1,ANXA1                                                                                                                                                                                                                                                                                                                                                                                                                                                                                                                                                                                                                                                                      |
| Cell death of hematopoietic progenitor cells             | 5.52E-03 | -0.84 | IFNG,CDKN2A,H1-2,FYN,TSC22D3,LCK,PRKDC,TLF4,DUSP41,TL,VB,LYLD,CD3E,IL2,NOTCH1,RAIP1,GDS1,BCL11B,ATM,MAP3K14,DFFAJ,IKKKB,BAD,ZC3H8,PARP1,DNAAJ3,MAP3K2,GZMA,ARHGAP1,BCL2,BIRC6,CASP3,PTPRC,BCL2L1,BAK,ETS1,FAS,CASP8,XXR8                                                                                                                                                                                                                                                                                                                                                                                                                                                                               |

|                                               |          |       |                                                                                                                                                                                                                                                          |
|-----------------------------------------------|----------|-------|----------------------------------------------------------------------------------------------------------------------------------------------------------------------------------------------------------------------------------------------------------|
| Cell cycle progression of T lymphocytes       | 2.75E-04 | -0.83 | KRASJL2JTGALAT5ATMCDKN2ACDKN1BCL2STAT5ABCL2L1STAT5BLAG3SKL1                                                                                                                                                                                              |
| Glycolysis of cells                           | 1.04E-02 | -0.82 | IL2TRAF3IP3CREMCRBNJFNGPLEKHA2EPAS1PIM1GSTP1PDCD1ANXA1                                                                                                                                                                                                   |
| Cell viability of mast cells                  | 1.62E-02 | -0.79 | GSK3BINPP5DLAX1LATFCER1GPK3R1YWHIAZRA2                                                                                                                                                                                                                   |
| Killing of cells                              | 5.15E-03 | -0.79 | IL2SLAMF1MAPK14JFNGPRF1L1Y9CARD9CD47IY96HLA-A.PRRCB.SLAMF6.RAB27A.BAX.FASS1D21A                                                                                                                                                                          |
| Cancer of cells                               | 8.39E-03 | -0.73 | GSK3B.PIK3R1.BT.G2.HIPK3.AT5A.NIBAN1.CD27.MSA41.CD3E.PAG.1.NOTCH1.BUB3.PRF1.PIM1.PDCD1.CD47.PARP1.NRAS.CD40LG.BCL2.CASP3.FCMR.BCL2L1.STAT5B.FAS.CASP8                                                                                                    |
| Apoptosis of thymocytes                       | 2.01E-03 | -0.71 | CDKN2A.H1-2.FYN.LCK.PRKDC.TLE4L.TB.CYLD.CD3E.IL2.NOTCH1.RAP1.GDS1.BCL11B.ATM.DFFA1.KKBK.ZC3H8.PARP1.MAP3K2.GZMA.ARH.GEF1.BCL2.BIRC6.CASP3.PTPRCB.AX.BCL2L1.ETS1.FAS.CASP8.XKR8                                                                           |
| Selection of lymphocytes                      | 4.84E-08 | -0.70 | RHOH.ED3E.TRAF3IP3.ATG5.PRKQ.ELK4.TAPBP.ELK1.THEMIS.GATA3.ELF1.SYK.SIT1.JTTPKBLTRAT1.CD3D.LCK.JTK.TOX.PTPRCBAX.PRKCH.FAS.ZAP70                                                                                                                           |
| Expansion of thymocytes                       | 8.99E-03 | -0.64 | SYK.ZBTB16.TOX.LY9.ZAP70.IKZF1                                                                                                                                                                                                                           |
| Solid tumor                                   | 1.02E-03 | -0.64 | IFITM1.GNB1.EIF4A2.PIK3R1.ATP6AP1.LCP1.SNRNP200.BTG2.HIPK3.STAT5A.LLCK.SRRM1.NIBAN1.DDX5.NONO.CD3E.PAG.1.BUB3.SRSF2.EP300.PIM1.ANKA1.CALCOCO2.PARP1.NRAS.CD40LG.PTPRCB.STAT5B.CASP8                                                                      |
| Function of TREG cells                        | 2.56E-02 | -0.63 | DLG1.LAT.TBX21.S1PR1                                                                                                                                                                                                                                     |
| Lymphatic system tumor                        | 1.15E-03 | -0.57 | GSK3B.CDKN2A.PIK3R1.BT.G2.INPP5D.HIPK3.AT5A.IL7R.LCK.NIBAN1.CD27.MSA41.CD3E.PAG.1.NOTCH1.BUB3.PRF1.PIM1.PDCD1.CD47.PARP1.NRAS.CD40LG.BCL2.CASP3.FCMR.BCL2L1.STAT5B.FAS.CASP8                                                                             |
| Lymphocytic neoplasm                          | 1.31E-03 | -0.57 | GSK3B.CDKN2A.PIK3R1.BT.G2.INPP5D.HIPK3.AT5A.IL7R.NIBAN1.CD27.MSA41.CD3E.PAG.1.NOTCH1.BUB3.PRF1.PIM1.PDCD1.CD47.PARP1.NRAS.CD40LG.BCL2.CASP3.FCMR.BCL2L1.STAT5B.FAS.CASP8                                                                                 |
| Myeloid or lymphoid neoplasm                  | 2.01E-03 | -0.57 | GSK3B.CDKN2A.PIK3R1.CD63.STAT3.BTG2.INPP5D.HIPK3.AT5A.IL7R.NIBAN1.CD27.MSA41.CD3E.PAG.1.NOTCH1.BUB3.PRF1.PIM1.PDCD1.CD47.PARP1.NRAS.CD40LG.BCL2.CASP3.FCMR.BCL2L1.STAT5B.FAS.CASP8                                                                       |
| Neoplasia of leukocytes                       | 2.06E-03 | -0.57 | GSK3B.CDKN2A.PIK3R1.CD63.BTG2.INPP5D.HIPK3.AT5A.IL7R.NIBAN1.CD27.MSA41.CD3E.PAG.1.NOTCH1.BUB3.PRF1.PIM1.PDCD1.CD47.PARP1.NRAS.CD40LG.BCL2.CASP3.FCMR.BCL2L1.STAT5B.FAS.CASP8                                                                             |
| Malignant solid tumor                         | 2.76E-03 | -0.57 | IFITM1.GNB1.EIF4A2.PIK3R1.ATP6AP1.LCP1.SNRNP200.BTG2.HIPK3.STAT5A.SRRM1.NIBAN1.DDX5.NONO.CD3E.PAG.1.BUB3.SRSF2.EP300.PIM1.CALCOCO2.PARP1.NRAS.CD40LG.PTPRCB.STAT5B.CASP8                                                                                 |
| Neoplasia of blood cells                      | 3.09E-03 | -0.57 | GSK3B.CDKN2A.PIK3R1.CD63.STAT3.BTG2.INPP5D.HIPK3.AT5A.IL7R.NIBAN1.CD27.MSA41.CD3E.PAG.1.NOTCH1.BUB3.PRF1.PIM1.PDCD1.CD47.PARP1.NRAS.CD40LG.BCL2.CASP3.FCMR.BCL2L1.STAT5B.FAS.CASP8                                                                       |
| Proliferation of naive T lymphocytes          | 9.94E-04 | -0.55 | CD3E.IL2.STAT3.CD40LG.DEF6.CDKN1B.TNFSF14.SOCS1.KKBK.PIM1.CD69                                                                                                                                                                                           |
| Expansion of natural killer cells             | 1.51E-02 | -0.53 | IRF1JL2JL2R8.SOCS1.PTPRC                                                                                                                                                                                                                                 |
| Hematological or lymphatic system tumor       | 2.43E-03 | -0.51 | GSK3B.CDKN2A.PIK3R1.CD63.STAT3.BTG2.INPP5D.HIPK3.AT5A.IL7R.LCK.NIBAN1.CD27.MSA41.CD3E.PAG.1.NOTCH1.BUB3.PRF1.PIM1.PDCD1.CD47.PARP1.NRAS.CD40LG.BCL2.CASP3.FCMR.BCL2L1.STAT5B.FAS.CASP8                                                                   |
| Quantity of naive lymphocytes                 | 1.71E-03 | -0.49 | DOCK8JL2JTGALICOS.CDKN1B.JTK.JKZF3                                                                                                                                                                                                                       |
| Tumorigenesis of lymphocytes                  | 2.17E-03 | -0.48 | GSK3B.CDKN2A.PIK3R1.BT.G2.INPP5D.HIPK3.AT5A.IL7R.NIBAN1.CD27.MSA41.CD3E.PAG.1.BUB3.PRF1.PIM1.PDCD1.CD47.PARP1.NRAS.CD40LG.BCL2.CASP3.FCMR.BCL2L1.STAT5B.CASP8                                                                                            |
| Cancer                                        | 1.07E-03 | -0.45 | GSK3B.IFITM1.GNB1.CDKN2A.EIF4A2.PIK3R1.ATP6AP1.LCP1.SNRNP200.STAT3.BTG2.HIPK3.STAT5A.SRRM1.NIBAN1.DDX5.CD27.NONO.MSA41.CD3E.PAG.1.NOTCH1.BUB3.SRSF2.PRF1.EP300.PIM1.PDCD1.CD47.CALCOCO2.PARP1.NRAS.CD40LG.BCL2.CASP3.PTPRCB.BCL2L1.FCMR.STAT5B.FAS.CASP8 |
| Hyperplasia of hematopoietic progenitor cells | 1.70E-02 | -0.45 | MAP2K7.PIK3R1.RAC2.IKZF1                                                                                                                                                                                                                                 |
| Transmembrane potential of mitochondria       | 1.68E-02 | -0.45 | CD47.MAPK14.BCL2.BCL2L1.FAS.CD2                                                                                                                                                                                                                          |
| Positive selection of lymphocytes             | 3.70E-09 | -0.42 | RHOH.TRAF3IP3.PRKQ.ELK4.ELK1.THEMIS.SYK.SIT1.TRAT1.LCK.JTK.TOX.PRKCH.PTPRC.ZAP70                                                                                                                                                                         |
| Degranulation of natural killer cells         | 2.18E-03 | -0.41 | IL2.TNFAIP3.KLRB1.PRF1.SLAMF6.RAB27A.PTPRC.DGKZ.ETS1.NCR3                                                                                                                                                                                                |

|                                               |         |       |                                                                                                                                                                                                                                                                                                                                                                                                                                                                                                                                                                                                                                                                         |
|-----------------------------------------------|---------|-------|-------------------------------------------------------------------------------------------------------------------------------------------------------------------------------------------------------------------------------------------------------------------------------------------------------------------------------------------------------------------------------------------------------------------------------------------------------------------------------------------------------------------------------------------------------------------------------------------------------------------------------------------------------------------------|
| Anergy of lymphocytes                         | 214E-02 | -0.39 | CD3EJL2,PAG1,NPP5D,CD5,PRKQ,CBLB                                                                                                                                                                                                                                                                                                                                                                                                                                                                                                                                                                                                                                        |
| Extrapneumatic malignant tumor                | 846E-04 | -0.37 | GSK3B,IFITM1,GNB1,CDKN2A,EIF4A2,PIK3R1,LATP6A1,LCP1,SNRNP200,STAT3,BTG2,HIPK3,STAT5A,SRRM1,NIBAN1,DDX5,CD27,NONO,M54A1,CD3E,PAG1,NOTCH1,BUB3,PRF1,PM1,POCD1,CD47,CALCOO2,PARP1,NRAS,CD40LG,BCL2,CASP3,FCMR,BCL2L1,STAT5B,FAS,CASP8                                                                                                                                                                                                                                                                                                                                                                                                                                      |
| Apoptosis of effector T lymphocytes           | 350E-05 | -0.34 | IL2,TLN1,JFNG,CDKN1B,PTPN22,FAS,POCD1                                                                                                                                                                                                                                                                                                                                                                                                                                                                                                                                                                                                                                   |
| Cell-mediated response                        | 629E-04 | -0.30 | FLT3LG,IL2,JFNG,ICOS,PRKAA1,ITGIT,POCD1,PYCARD,HSDL1,MALT1,PARP1,STAT3,CD8A,CDKN1B,IL7R,ITK,BAK,SH2D1A,PGAP3,CASP8                                                                                                                                                                                                                                                                                                                                                                                                                                                                                                                                                      |
| Cell death of cytotoxic T cells               | 405E-03 | -0.28 | IL2,GZMA,PRKAA1,PRF1,FAS                                                                                                                                                                                                                                                                                                                                                                                                                                                                                                                                                                                                                                                |
| Conversion of T lymphocytes                   | 221E-02 | -0.28 | IL2,PARP1,STAT4,TNFAIP3,JFNG,BCL11B                                                                                                                                                                                                                                                                                                                                                                                                                                                                                                                                                                                                                                     |
| Accumulation of B lymphocytes                 | 221E-02 | -0.27 | TLN1,DEF6,TSC22D3,ICOS,BCL2,CD99,IKBKB,FAS,BAD                                                                                                                                                                                                                                                                                                                                                                                                                                                                                                                                                                                                                          |
| Cell death of thymocytes                      | 227E-03 | -0.26 | CDKN2A,H1-2,FYN,CLK,PRKCB,LEA1B,CYL10,CD3EJL2,NOTCH1,IAP1,GDS,BC111B,ATM,MAP3K14,DFFA,IKBKB,BAD,ZC3H8,PARP1,DNAJA3,MAP3K2,GZMA,ARHGAP1,BCL2,BIRC6,CASP3,PTPRC,BAX,BCL2L1,ETS1,FAS,CASP8,XKR8                                                                                                                                                                                                                                                                                                                                                                                                                                                                            |
| Survival of organism                          | 863E-03 | -0.22 | NRAS,TNFAIP3,ATG5,JFNG,BCL2,STAT5A,IL7R,NCF1,BCL2L1,STAT5B,CASP8                                                                                                                                                                                                                                                                                                                                                                                                                                                                                                                                                                                                        |
| Suppression of TREG cells                     | 448E-04 | -0.20 | GATA3,IL2,PARP1,SMFD1,EP300,DGKZ,CD6,PIM1,POCD1                                                                                                                                                                                                                                                                                                                                                                                                                                                                                                                                                                                                                         |
| Proliferation of double-negative T lymphocyte | 434E-04 | -0.16 | IL2,TNFAIP3,CDKN1B,MAP3K14,RICTOR,HNRP1,RASGRP1,LTB                                                                                                                                                                                                                                                                                                                                                                                                                                                                                                                                                                                                                     |
| Proliferation of granulocytes                 | 102E-02 | -0.14 | STAT3,MAPK14,ATG5,STAT5A,PTPRC,STAT5B,LAG3,SENP1                                                                                                                                                                                                                                                                                                                                                                                                                                                                                                                                                                                                                        |
| Quantity of naive T lymphocytes               | 151E-02 | -0.13 | DOCKB,IL2,ITGAL,CDKN1B,ITK                                                                                                                                                                                                                                                                                                                                                                                                                                                                                                                                                                                                                                              |
| Quantity of germinal center B lymphocytes     | 411E-03 | -0.11 | IL2,ICOS,MAP3K14,PRDM1,MALT1,STAT3,CD40LG,ARHGAP1,ITK,FCMR,FAS,MAP1,SH2D1A                                                                                                                                                                                                                                                                                                                                                                                                                                                                                                                                                                                              |
| Function of lymphocytes                       | 538E-09 | -0.10 | IRF1,ITGAL,ARAP13,CDK5,ICOS,PRKQ,FCER1G,IL16,IL2RG,STR10,MCPI1,ARHGAP6,CD8A,CBLB,LAT,LAG3,PIK3C3,IL1HR1,S1PR1,CD3E,IL2,TNXP1,DG1,PRF1,LAAX1,HCST,POSTPPI1,TPABP,CD69,BAD,BCL2L1,NTAN1,STAT5B,ETS1,STR4,GSK3B,FLT3LG,GIMAP4,SLAMF1,JFNG,CREB1,TNFAIPB1,IL13RA1,SELENOK,PTPN22,WIP1,PIK3R1,TAP1,FYN,NPP5D,STAT5A,ITK,SLAMF6,PRKDC,CD27,GADD45G,CCEZ,STAT4,CD8B,TAX1BP1,CD3G,TNFSF14,ATM,PPP3CB,PI3K,POCD1,CD44,CD96,JILA-A,CD40LG,ARHGAP1,BCL2,SOCS1,PTPRC,CD247,SH2D1A,PGAP3,TBZ2L1,ARNAK                                                                                                                                                                                |
| Extracranial solid tumor                      | 392E-03 | -0.09 | PAG1,IFITM1,SRSF2,EP300,GNB1,EIF4A2,PIK3R1,LATP6A1,LCP1,ANKA1,SNRNP200,CALCOO2,CLK,SRRM1,PTPRC,DDX5,NONO                                                                                                                                                                                                                                                                                                                                                                                                                                                                                                                                                                |
| Apoptosis of naive T lymphocytes              | 101E-03 | -0.07 | IL2,PRF1,FAS,IL2RG                                                                                                                                                                                                                                                                                                                                                                                                                                                                                                                                                                                                                                                      |
| Lymphoproliferative disorder                  | 129E-03 | 0.00  | GSK3B,CDKN2A,PIK3R1,BTG2,NPP5D,HIPK3,STAT5A,IL7R,NIBAN1,LAT,CD27,M54A1,CD3E,PAG1,NOTCH1,BUB3,PRF1,PM1,POCD1,CD47,PARP1,NRAS,CD40LG,BCL2,CASP3,FCMR,BCL2L1,STAT5B,FAS,CASP8                                                                                                                                                                                                                                                                                                                                                                                                                                                                                              |
| Suppression of regulatory T lymphocytes       | 612E-04 | 0.10  | GATA3,IL2,PARP1,SMFD1,EP300,DGKZ,TNFRSF10,PIM1,CD6,POCD1                                                                                                                                                                                                                                                                                                                                                                                                                                                                                                                                                                                                                |
| Quantity of effector memory T lymphocytes     | 131E-02 | 0.11  | MALT1,FLT3LG,ITGAL,ANGPT2,ICOS,SOCS1,SERPINB6                                                                                                                                                                                                                                                                                                                                                                                                                                                                                                                                                                                                                           |
| Apoptosis of CD4+ T-lymphocytes               | 999E-03 | 0.11  | IL2,JFNG,CD5,PRKQ,FAS,CD6,GIMAP1                                                                                                                                                                                                                                                                                                                                                                                                                                                                                                                                                                                                                                        |
| Apoptosis                                     | 115E-08 | 0.11  | IRF1,ICOS,CDKN2A,FCER1G,IL2RG,CXCR4,STING,IJMG8B,IL7R,CLK,PRKCB,TRAF1,TL6,SKIL1,LTB,S1PR1,IL2,TLN1,EZR,PTGER4,ZC3H8,CD47,DNAJA3,CAMK2G,BIRC6,FCMR,BAX,BCL2L1,STAT5B,FASETS1,FLT3LG,RHOH,SLC6A6,CREB1,JFNG,FOXO1,2B7B16,PTPN22,H1-2,FYN,STAT5A,ISG15,CD27,WIP1,CASP10,NOTCH1,GPR13,2R4P1,GDS1,BCL11B,CD5,EP300,OGT,KIB1,CD40LG,STAT5A,ITK,SLAMF6,PRKDC,CD27,GADD45G,CCEZ,STAT4,CD8B,TAX1BP1,CD3G,TNFSF14,ATM,PPP3CB,PI3K,POCD1,CD44,CD96,JILA-A,CD40LG,ARHGAP1,BCL2,SOCS1,PTPRC,CD247,SH2D1A,PGAP3,TBZ2L1,ARNAK,APK14,TNFAIPB1,PIK3R1,CD6,RAC2,NPP5D,TSC22D3,ITK,PRKDC,GADD45G,KRAS,ATM,DFFA,PPP3CB,POCD1,CD44,CASP6,TNFAIP3,MAP3K2,SOCS1,PPP2R2B,PTPRC,CD247,CASP8,XKR8 |
| Conversion of leukocytes                      | 131E-02 | 0.13  | IL2,PARP1,STAT4,TNFAIP3,BACH1,JFNG,BCL11B                                                                                                                                                                                                                                                                                                                                                                                                                                                                                                                                                                                                                               |
| Apoptosis of leukocytes                       | 146E-08 | 0.19  | IRF1,ICOS,CDKN2A,FCER1G,IL2RG,CXCR4,STING,IJMG8B,IL7R,CLK,PRKCB,TRAF1,TL6,SKIL1,LTB,S1PR1,IL2,TLN1,EZR,PTGER4,ZC3H8,CD47,DNAJA3,CAMK2G,BIRC6,BCL2L1,LBAX,FCMR,STAT5B,FASETS1,FLT3LG,RHOH,SLC6A6,CREB1,JFNG,FOXO1,2B7B16,PTPN22,H1-2,FYN,STAT5A,ISG15,WIP1,CD27,CASP10,NOTCH1,GPR13,2R4P1,GDS1,BCL11B,CD5,EP300,OGT,KIB1,CD40LG,STAT5A,ITK,SLAMF6,PRKDC,CD27,GADD45G,CCEZ,STAT4,CD8B,TAX1BP1,CD3G,TNFSF14,ATM,PPP3CB,PI3K,POCD1,CD44,CD96,JILA-A,CD40LG,ARHGAP1,BCL2,SOCS1,PTPRC,CD247,SH2D1A,PGAP3,TBZ2L1,ARNAK,NFAIPB1,PIK3R1,CD6,RAC2,NPP5D,TSC22D3,ITK,PRKDC,GADD45G,KRAS,ATM,DFFA,PPP3CB,POCD1,CD44,CASP6,TNFAIP3,MAP3K2,SOCS1,PPP2R2B,PTPRC,CD247,CASP8,XKR8       |
| Quantity of central memory T lymphocyte       | 104E-02 | 0.19  | MALT1,ITGAL,CD40LG,ICOS                                                                                                                                                                                                                                                                                                                                                                                                                                                                                                                                                                                                                                                 |
| Cell-mediated response of T lymphocytes       | 289E-03 | 0.21  | FLT3LG,JFNG,ICOS,ITGIT,POCD1,PYCARD,HSDL1,MALT1,PARP1,STAT3,CDKN1B,IL7R,ITK,PGAP3,CASP8                                                                                                                                                                                                                                                                                                                                                                                                                                                                                                                                                                                 |

|                                             |          |      |                                                                                                                                                                                                                                                                                                                                                                                                                                                                                                                                   |
|---------------------------------------------|----------|------|-----------------------------------------------------------------------------------------------------------------------------------------------------------------------------------------------------------------------------------------------------------------------------------------------------------------------------------------------------------------------------------------------------------------------------------------------------------------------------------------------------------------------------------|
| Killing of antigen presenting cells         | 743E-03  | 0.22 | MAPK14,SLAMF1,IFNG,SLAMF6,BAKL1,Y9,SH2D1A                                                                                                                                                                                                                                                                                                                                                                                                                                                                                         |
| Killing of phagocytes                       | 743E-03  | 0.22 | MAPK14,SLAMF1,IFNG,SLAMF6,BAKL1,Y9,SH2D1A                                                                                                                                                                                                                                                                                                                                                                                                                                                                                         |
| Renal cancer                                | 1.33E-03 | 0.30 | SNRN200,CALCOCO2,JFTT M1,SRSF2,SRRM1,GNB1,DOX5,EJF4A2,ATP6A1,NONO1,CP1                                                                                                                                                                                                                                                                                                                                                                                                                                                            |
| Cellular infiltration by leukocytes         | 2.45E-02 | 0.34 | CRFB,MAPK14,IFNG,CCL5,ICOS,BCL11B,NR1H2,PIK3R1,PRDM1,IL16,POCD1,CD44,CD47,STAT3,BRAF,LAG3,TBX21                                                                                                                                                                                                                                                                                                                                                                                                                                   |
| Function of T lymphocytes                   | 4.55E-08 | 0.38 | ITGAL,CBX5,ICOS,PRKCG,FCER1G,IL116,STK10,MCPH1,ARHGGE6,CD8A,CBLB,LAT1,LAG3,PK3C3L1,18R1,LS1,PR1,CD3E,IL2,DG,G1,PPF1,LA,IL1,HCST,PTPPI1,TAPPD,CD69,BAD,BCL2L1,NTAN1,STAT5B,STK4,GSK3B,FLT3LG,GIMAP4,SLAMF1,CREB1,IFNG,TNFAIP8L2J1,13RA1,SELENOK,PTPN22,WIPF1,FYN,NPP5D,STAT5A,ITK,SLAMF6,PRKDC,CD27,GADD45G,CCR2,STAT4,CD8B,ITAX1B,PI,CD3G,TNFSF14,ATM,PPP93C,RYB1,POCD1,CD44,HLA-A,CD40LG,BCL2,PTPRC,CD247,SH2D1A,GAP3,TBX21,LAHNAK                                                                                               |
| Quantity of gamma-delta T lymphocytes       | 1.83E-03 | 0.38 | RHOJL2,ITGAL,RICTOR,IKZF1,GPR18,ST1,CD8A,CDKN1B,BCL2,IL7R,LCJTK,SOCS1,TNIP1,PTPRC                                                                                                                                                                                                                                                                                                                                                                                                                                                 |
| Differentiation of TREG cells               | 2.21E-02 | 0.38 | CCR2,IL2,MAPK14,ITK,CD69,S1PR1                                                                                                                                                                                                                                                                                                                                                                                                                                                                                                    |
| Cell death of effector T lymphocytes        | 2.73E-06 | 0.44 | IL2,TLN1,IFNG,CDKN1B,PRKAA1,SMPD1,PTPN22,FAS,POCD1                                                                                                                                                                                                                                                                                                                                                                                                                                                                                |
| Quantity of memory T lymphocytes            | 5.09E-05 | 0.53 | FLT3LG,IL2,GRAP2,ITGAL,ANGPT2,ICOS,IL2RB,PTPN22,SERPINB6,PIK3R1,IRF2,THEMIS,MALTY1,CD40LG,ITK,SOCS1,BCL2L1,PRKCH,ETS1,CD27,STK17B,TBX21,LTB                                                                                                                                                                                                                                                                                                                                                                                       |
| Exhaustion of T lymphocytes                 | 8.59E-05 | 0.54 | DOCK8,IFNG,ANDG,IL2RB,TNFRSF18,CD27,POCD1                                                                                                                                                                                                                                                                                                                                                                                                                                                                                         |
| Quantity of effector T lymphocytes          | 4.75E-03 | 0.55 | MALT1,FLT3LG,IL2,ITGAL,ANGPT2,ICOS,CDKN1B,SOCS1,SERPINB6                                                                                                                                                                                                                                                                                                                                                                                                                                                                          |
| Suppressive capacity of TREG cells          | 6.39E-04 | 0.57 | PARP1,SMPD1,EP300,DGK2,CD6,PIM1,POCD1                                                                                                                                                                                                                                                                                                                                                                                                                                                                                             |
| Quantity of double-negative T lymphocyte    | 1.38E-06 | 0.57 | FLT3LG,RHOH,PRKCG,TAP1,IL2RG,CNDB3,IL7R,LCJTK,LAT,PRKCH,LAG3,ASXL1,PRKDC,GRAP2,IL2,CD3E,BCL11B,ATM,JA,1,PPARD,KAT6A,BCL2,PTPRC,KMT2E,ETS1,FAS,CD247                                                                                                                                                                                                                                                                                                                                                                               |
| Cell death of PBMCs                         | 2.14E-02 | 0.58 | GIMAP4,CD40LG,EZR,PTPRC,FASZAP70,GIMAP1                                                                                                                                                                                                                                                                                                                                                                                                                                                                                           |
| Metabolism of DNA                           | 2.60E-03 | 0.59 | IL2,PARP1,IFNG,CAMK2G,DPFAC,ASP3,FAS                                                                                                                                                                                                                                                                                                                                                                                                                                                                                              |
| Fragmentation of DNA                        | 2.66E-03 | 0.59 | IL2,PARP1,IFNG,DPFAC,ASP3,FAS                                                                                                                                                                                                                                                                                                                                                                                                                                                                                                     |
| Quantity of helper T lymphocytes            | 2.25E-03 | 0.64 | IRF1,IFNG,ICOS,T0B1,PRKQJ,113RA1,NDF1P1,TAP1,RASGRP1,GATA3,MALT1,STAT3,PIK3AP1,LCCK,CCR2,IL2,CCL5,KKKB,TIGIT,SERPINB6,PRDM1,MAF,CD69,PVCARD,BATF,TNIP1,TNFRSF18,SH2D1A,TBX21,ATXN1,XXR8                                                                                                                                                                                                                                                                                                                                           |
| Cell death of effector memory T lymphocytes | 1.11E-03 | 0.64 | IL2,IFNG,PRKAA1,SMPD1,FAS                                                                                                                                                                                                                                                                                                                                                                                                                                                                                                         |
| Hyperplasia of leukocytes                   | 4.98E-03 | 0.65 | CYLD,MAP2K7,MAPK14,MAP3K14,CDKN2A,PIK3R1,RAC2,IKZF1,CD40LG,BAX,LAT,TNFRSF18,DIUSP4                                                                                                                                                                                                                                                                                                                                                                                                                                                |
| Organismal death                            | 6.77E-03 | 0.68 | CD3E,IFNG,MSN,EP300,GNB1,CDKN2A,PRDM1,ATP6A1,LCPI1,TNFAIP3,SOCS1,EJF4A1,DOX5,CASP8,BRD2                                                                                                                                                                                                                                                                                                                                                                                                                                           |
| Activation of memory T lymphocytes          | 4.18E-03 | 0.71 | MALT1,IL2,HLA-A,CDKN1B,MGST1,ZAP70                                                                                                                                                                                                                                                                                                                                                                                                                                                                                                |
| Apoptosis of T lymphocytes                  | 4.28E-13 | 0.73 | ATG5,ICOS,PRKCG,CDKN2A,IL2RG,DOCK8,STING1,STAT3,CKCR4,IL7R,LCJTK,TRAF1,TL4,PK3C3L1,TR,CYLD,GRAP2,CD3E,IL2,CCL5,TLN1,EZR,PRF1,KBKRB,ZH18,CD47,DNAI3,CDKN1B,BIRC6,CASP9,BCL2L1,BAK,F0MR,STAT5B,ETS1,FAS,STK17B,GSK3B,RHOH,SLGAG,IFNG,CREB1,TNFAIP8L2,ZBTB16,PTPN22,PIK3R1,CD6,RAC2,H1-2,FYNTSC22D3,STAT5A,ITK,PRKDC,WWP2,CD27,KRAS,CASP10,NOTCH1,GPR132,RAF1,GDS1,CD5,BCL11B,ATM,EP300,PPP3CB,DPFAC,OGT,KLRCL,POCD1,CD44,GIMAP1,CASP6,PARP1,MAP3K2,G2MA,ARHGGEF1,BCL2,PPP2R2B,SOCS1,PTPRC,TNFRSF18,CD247,XCL1,CD2,CASP8,XXR8,ANKZF1 |
| Apoptosis of TREG cells                     | 1.48E-04 | 0.75 | IL2,TLN1,EP300,PTPN22,POCD1                                                                                                                                                                                                                                                                                                                                                                                                                                                                                                       |
| Killing of natural killer cells             | 1.68E-02 | 0.83 | SLAMF1,HLA-A,PRF1,SLAMF6,RAB27A,LY9                                                                                                                                                                                                                                                                                                                                                                                                                                                                                               |
| Apoptosis of regulatory T lymphocytes       | 4.00E-07 | 0.94 | IL2,TLN1,STAT5A,EP300,PTPN22,FAS,STAT5B,POCD1                                                                                                                                                                                                                                                                                                                                                                                                                                                                                     |
| Cell death of naive T lymphocytes           | 7.54E-05 | 0.98 | IL2,FYN,LCJL7R,PRF1,CASP3,FAS,IL2RG                                                                                                                                                                                                                                                                                                                                                                                                                                                                                               |
| Hyperplasia of T lymphocytes                | 1.08E-03 | 1.00 | MAP2K7,MAPK14,MAP3K14,LAT,BAX,TNFRSF18,DIUSP4,IKZF1                                                                                                                                                                                                                                                                                                                                                                                                                                                                               |

|                                               |         |      |                                                                                                                                                                                                                                                                                                                                                                                                                                                                                                                                                                                                                                                                                              |
|-----------------------------------------------|---------|------|----------------------------------------------------------------------------------------------------------------------------------------------------------------------------------------------------------------------------------------------------------------------------------------------------------------------------------------------------------------------------------------------------------------------------------------------------------------------------------------------------------------------------------------------------------------------------------------------------------------------------------------------------------------------------------------------|
| B-cell neoplasm                               | 248E-03 | 1.00 | MS4A1,GSKB,PAG1,BUB3,PRF1,CDKN2A,PI3K,POCD1,CD47,PARP1,BTG2,CD40LG,INPP5D,HIPK3,BCL2,IL7R,CASP3,NIBAN1,FCMR,BCL2L1,CD27,CASP8                                                                                                                                                                                                                                                                                                                                                                                                                                                                                                                                                                |
| Lifespan of blood cells                       | 212E-02 | 1.00 | SEMA4D,DOCKR1,FNG,CDKN2A,KIKKB                                                                                                                                                                                                                                                                                                                                                                                                                                                                                                                                                                                                                                                               |
| Development of regulatory T lymphocytes       | 239E-03 | 1.04 | IL2,STAT4,IFNG,ICOS,STIM2,PRKQ,IL2RB,GPRI174,PARP1,STAT3,CREBBP,CBLB,ETS1,TBX21,S1PR1                                                                                                                                                                                                                                                                                                                                                                                                                                                                                                                                                                                                        |
| Apoptosis of helper T lymphocytes             | 103E-02 | 1.08 | IL2,CREB1,BCL2,FAS,CD6                                                                                                                                                                                                                                                                                                                                                                                                                                                                                                                                                                                                                                                                       |
| Proliferation of CD8+ T lymphocyte            | 722E-03 | 1.11 | IL2,RAS2,STAT4,IFNG,CD5,POCD1,CD8A,TNFAIP3,CDKN1B,STAT5A,LCK,ANO6,BATF,JBASH3A,SOC1,CRUB,PCBP2,PTPRC,CYTI,PDGKZ,TNFRSF18,STAT5B                                                                                                                                                                                                                                                                                                                                                                                                                                                                                                                                                              |
| Cell death of T lymphocytes                   | 468E-15 | 1.13 | ICOS,CDKN2A,IL2RB,STING1,LCXCR4,IL7R,LCK,LAT,TRAF1,LGAG3,TLF4,IL7,IL2,TLN1,EZR,PRDM1,ZC3H8,CD47,DNAJA3,BIRC6,BCL2L1,BAFF,FCMR,STAT5B,ETS1,FAS,SHO1,SLC6A6,CREB1,IFNG,FOXP1,ZBTB16,PTPN22,H12,FYN,STAT5A,WWP2,CD27,CASP10,NOTCH1,GPRI32,RAP1GDS1,CD5,BCL11B,CD99,MAP3K14,EP300,OCT4,KLRCL1G,MAP1P,PARP1,GZMA,ARHGAP1,BCL2,TNFRSF18,CD2,ANKZF1,LAT,G5,PRKQ,PKNA1,DOCK8,STAT3,PKI3C3,CYLD,GRAP2,CD3E,CCL5,PRF1,SMPD1,KIKKB,BAD,SH2D2A,CDKN1B,CASP3,STK17B,GSKB,SH2D2A,MAP4,MAPK14,TNFAIP8L2,PKI3R1,CD6,RAC2,TSC2D3,DEF6,ITK,PRKDC,KRAS,ATM,DFPA,PPP3CB,POCD1,CD44,CASP6,MAP3K2,SOC1,PPP2R2B,PTPRC,CD247,SH2D1A,CASP9,XXR8                                                                       |
| Cell death of B lymphocytes                   | 261E-03 | 1.13 | IFNG,FOXP1,CDKN2A,PKI3R1,MALT1,STAT3,STING1,INPP5D,NOCD2,TSC2D3,PRKCB,CD27,DUSP4,SKI1,S1PR1,MS4A1,IL2,CD5,SMPD1,PRF1,POCD1,BAD,CD40LG,BCL2,PTPRC,FCMR,BAX,BCL2L1,ORMDL3,ETS1,FAS,CASP9,ANKZF1                                                                                                                                                                                                                                                                                                                                                                                                                                                                                                |
| Apoptosis of mononuclear leukocytes           | 162E-10 | 1.20 | ICOS,CDKN2A,IL2RB,CDC8,4,STING1,IL7R,LCK,PRKCB,LAT,TRAF1,TLF4,SKI1,TLB,SI,PR1,IL2,TLN1,EZR,ZC3H8,CD47,DNAJA3,BIRC6,BCL2L1,BAFF,FCMR,STAT5B,FAS,ETS1,RHOH,SLC6A6,CREB1,IFNG,FOXP1,ZBTB16,PTPN22,H12,FYN,STAT5A,WWP2,CD27,CASP10,NOTCH1,GPRI32,RAP1GDS1,BCL11B,CD5,EP300,OCT4,KLRCL1G,MAP1P,AR1,CD40LG,GZMA,BCL2,ARHGAP1,TNFRSF18,ORMDL3,XCL1,CD2,ANKZF1,LAT,G5,PRKQ,MALT1,DOCK8,STAT3,NOCD2,DUSP4,PKI3C3,CYLD,GRAP2,CD3E,CCL5,PRF1,SMPD1,KIKKB,BAD,CDKN1B,CASP3,STK17B,GSKB,TNFAIP8L2,PKI3R1,CD6,RAC2,NPP5D,TSC2D3,ITK,PRKDC,GADD45G,KRAS,ATM,DFPA,PPP3CB,POCD1,CD44,CASP6,MAP3K2,SOC1,PPP2R2B,PTPRC,CD247,CASP9,XXR8                                                                         |
| Cell death of mononuclear leukocytes          | 139E-12 | 1.27 | ICOS,CDKN2A,IL2RB,CDC8,4,STING1,IL7R,LCK,PRKCB,LAT,TRAF1,TLF4,SKI1,TLB,SI,PR1,IL2,TLN1,EZR,PRDM1,ZC3H8,CD47,DNAJA3,BIRC6,BCL2L1,BAFF,FCMR,STAT5B,FAS,ETS1,RHOH,SLC6A6,CREB1,IFNG,FOXP1,ZBTB16,PTPN22,H12,FYN,STAT5A,WWP2,CD27,CASP10,NOTCH1,GPRI32,RAP1GDS1,BCL11B,CD5,CD99,EP300,MAP3K14,OCT4,KLRCL1G,MAP1P,PARP1,CD40LG,GZMA,BCL2,ARHGAP1,TNFRSF18,ORMDL3,XCL1,CD2,ANKZF1,LAT,G5,PRKAA1,PRKQ,MALT1,DOCK8,STAT3,NOCD2,DUSP4,PKI3C3,CYLD,GRAP2,CD3E,CCL5,PRF1,SMPD1,KIKKB,BAD,CDKN1B,CASP3,STK17B,GSKB,SH2D2A,MAP4,MAPK14,TNFAIP8L2,PKI3R1,CD6,RAC2,NPP5D,DEF6,TSC2D3,ITK,PRKDC,GADD45G,KRAS,ATM,PPP3CB,DFPA,POCD1,CD44,CASP6,TNFAIP3,MAP3K2,SOC1,PPP2R2B,PTPRC,CD247,SH2D1A,CASP9,XXR8      |
| Apoptosis of lymphocytes                      | 339E-11 | 1.29 | ICOS,CDKN2A,IL2RB,CDC8,4,STING1,IL7R,LCK,PRKCB,LAT,TRAF1,TLF4,SKI1,TLB,SI,PR1,IL2,TLN1,EZR,ZC3H8,CD47,DNAJA3,BIRC6,BCL2L1,BAFF,FCMR,STAT5B,FAS,ETS1,RHOH,SLC6A6,CREB1,IFNG,FOXP1,ZBTB16,PTPN22,H12,FYN,STAT5A,WWP2,CD27,CASP10,NOTCH1,GPRI32,RAP1GDS1,BCL11B,CD5,EP300,OCT4,KLRCL1G,MAP1P,AR1,CD40LG,GZMA,BCL2,ARHGAP1,TNFRSF18,ORMDL3,XCL1,CD2,ANKZF1,LAT,G5,PRKQ,MALT1,DOCK8,STAT3,NOCD2,DUSP4,PKI3C3,CYLD,GRAP2,CD3E,CCL5,PRF1,SMPD1,KIKKB,BAD,CDKN1B,CASP3,STK17B,GSKB,TNFAIP8L2,PKI3R1,CD6,RAC2,NPP5D,TSC2D3,ITK,PRKDC,KRAS,ATM,DFPA,PPP3CB,POCD1,CD44,CASP6,MAP3K2,SOC1,PPP2R2B,PTPRC,CD247,CASP9,XXR8                                                                                 |
| Frequency of TREM cells                       | 899E-03 | 1.36 | IL2,PARP1,MAPK14,SMPD1,PTPN22,CD6                                                                                                                                                                                                                                                                                                                                                                                                                                                                                                                                                                                                                                                            |
| Cell death of helper T lymphocytes            | 171E-03 | 1.40 | IL2,CREB1,BCL2,SMPD1,CASP3,FAS,CD6                                                                                                                                                                                                                                                                                                                                                                                                                                                                                                                                                                                                                                                           |
| Lymphoid hyperplasia                          | 754E-03 | 1.43 | CYLD,MAP2K7,MAPK14,CD40LG,MAP3K14,BAX,LAT,TNFRSF18,DUSP4,KZF1                                                                                                                                                                                                                                                                                                                                                                                                                                                                                                                                                                                                                                |
| Cell death of lymphocytes                     | 635E-13 | 1.44 | ICOS,CDKN2A,IL2RB,CDC8,4,STING1,IL7R,LCK,PRKCB,LAT,TRAF1,TLF4,SKI1,TLB,SI,PR1,IL2,TLN1,EZR,PRDM1,ZC3H8,CD47,DNAJA3,BIRC6,BCL2L1,BAFF,FCMR,STAT5B,FAS,ETS1,RHOH,SLC6A6,CREB1,IFNG,FOXP1,ZBTB16,PTPN22,H12,FYN,STAT5A,WWP2,CD27,MS4A1,CASP10,NOTCH1,GPRI32,RAP1GDS1,BCL11B,CD5,CD99,EP300,MAP3K14,OCT4,KLRCL1G,MAP1P,PARP1,CD40LG,GZMA,BCL2,ARHGAP1,TNFRSF18,ORMDL3,XCL1,CD2,ANKZF1,LAT,G5,PRKAA1,PRKQ,MALT1,DOCK8,STAT3,NOCD2,DUSP4,PKI3C3,CYLD,GRAP2,CD3E,CCL5,PRF1,SMPD1,KIKKB,SH2D2A,BAD,CDKN1B,CASP3,STK17B,GSKB,SH2D2A,MAP4,MAPK14,TNFAIP8L2,PKI3R1,CD6,RAC2,NPP5D,DEF6,TSC2D3,ITK,PRKDC,KRAS,ATM,DFPA,PPP3CB,POCD1,CD44,CASP6,TNFAIP3,MAP3K2,SOC1,PPP2R2B,PTPRC,CD247,SH2D1A,CASP9,XXR8 |
| Apoptosis of B lymphocytes                    | 610E-03 | 1.51 | IFNG,FOXP1,CDKN2A,PKI3R1,MALT1,STAT3,NOCD2,TSC2D3,PRKCB,CD27,DUSP4,SKI1,S1PR1,IL2,CD5,SMPD1,PRF1,BAD,CD40LG,BCL2,PTPRC,BAX,BCL2L1,FCMR,ORMDL3,ETS1,FAS,CASP9,ANKZF1                                                                                                                                                                                                                                                                                                                                                                                                                                                                                                                          |
| Frequency of regulatory T lymphocytes         | 129E-02 | 1.64 | CYLD,IL2,PARP1,MAPK14,SMPD1,RICTOR,PTPN22,CD6                                                                                                                                                                                                                                                                                                                                                                                                                                                                                                                                                                                                                                                |
| Number of activated T lymphocyte              | 999E-03 | 2.61 | DUSP10,IL2,GRAP2,PRF1,IL2RB,SOC1,MHP1                                                                                                                                                                                                                                                                                                                                                                                                                                                                                                                                                                                                                                                        |
| Morphology of lymphocytes                     | 278E-11 |      | IRF1,PRKQ,FCER1G,RASGRP1,IL2RG,MALT1,SYK,CD8A,PKI3AP1,IL7R,LCK,CBLB,LAT,CYTI,PRKCI,LYT1,IL7R,CYLD,GRAP2,CD3E,IL2,TXNIP,CD46,PRDM1,BATF,CDKN2B,BCL2L1,FCMR,BAK,ETS1,STAT5B,FAS,STK4,EP515,FLT3LG,SEMA4D,RHOH,IFNG,IL2RB,PTPN22,TAP1,LCJ,KZF1,INPP5D,ITPKB1,TKT,OXCREBBP,PRKDC,CD8B,BCL11B,TNFSF14,MARK2,PPP3CB,LY9,SLA,THEMISHLA-A,BCL2,RUNX3,SOC1,PTPRC,CD247,SH2D1A,ERN1,PGAP3,TBX21,LYST                                                                                                                                                                                                                                                                                                   |
| Abnormal morphology of lymphocytes            | 410E-11 |      | IRF1,PRKQ,FCER1G,RASGRP1,IL2RG,MALT1,SYK,CD8A,PKI3AP1,IL7R,LCK,CBLB,LAT,CYTI,PRKCI,LYT1,IL7R,CYLD,GRAP2,CD3E,IL2,TXNIP,CD46,PRDM1,BATF,CDKN2B,BCL2L1,FCMR,BAK,ETS1,STAT5B,FAS,STK4,EP515,FLT3LG,SEMA4D,RHOH,IFNG,IL2RB,PTPN22,TAP1,LCJ,KZF1,INPP5D,ITPKB1,TKT,OXCREBBP,PRKDC,CD8B,BCL11B,TNFSF14,MARK2,PPP3CB,LY9,SLA,THEMISHLA-A,BCL2,RUNX3,SOC1,PTPRC,CD247,SH2D1A,ERN1,PGAP3,TBX21                                                                                                                                                                                                                                                                                                        |
| Abnormal morphology of mononuclear leukocytes | 593E-11 |      | IRF1,FTL,PRKQ,FCER1G,RASGRP1,IL2RG,MALT1,SYK,CD8A,PKI3AP1,IL7R,LCK,CBLB,LAT,CYTI,PRKCI,LYT1,IL7R,CYLD,GRAP2,CD3E,IL2,TXNIP,PRDM1,BATF,CDKN2B,BAX,FCMR,ETS1,STAT5B,FAS,STK4,EP515,FLT3LG,SEMA4D,RHOH,IFNG,IL2RB,PTPN22,TAP1,LCJ,KZF1,INPP5D,ITPKB1,TKT,OXCREBBP,PRKDC,CD8B,BCL11B,TNFSF14,MARK2,PPP3CB,LY9,SLA,THEMISHLA-A,BCL2,RUNX3,SOC1,PTPRC,CD247,SH2D1A,ERN1,PGAP3,TBX21                                                                                                                                                                                                                                                                                                                |
| Morphology of T lymphocytes                   | 631E-11 |      | IRF1,RHOH,PRKQ,PTPN22,FCER1G,TAP1,RASGRP1,IL2RG,MALT1,INPP5D,CD8A,ITPKB1,IL7R,LCK,TKT,OX,CRUB,CYTI,PRKCI,LAT,CD3E,GRAP2,IL2,CD8B,BCL11B,MARK2,TNFSF14,CD46,PPP3CB,LY9,SLA,THEMISHLA-A,BCL2,RUNX3,SOC1,PTPRC,BAX,BCL2L1,STAT5B,ETS1,FAS,SH2D1A,CD247,PGAP3,TBX21,LYST                                                                                                                                                                                                                                                                                                                                                                                                                         |
| Morphology of mononuclear leukocytes          | 655E-11 |      | IRF1,FTL,PRKQ,FCER1G,RASGRP1,IL2RG,MALT1,SYK,CD8A,PKI3AP1,IL7R,LCK,CBLB,LAT,CYTI,PRKCI,LYT1,IL7R,CYLD,GRAP2,CD3E,IL2,TXNIP,CD46,PRDM1,BATF,CDKN2B,BCL2L1,FCMR,BAK,ETS1,STAT5B,FAS,STK4,EP515,FLT3LG,SEMA4D,RHOH,IFNG,IL2RB,PTPN22,TAP1,LCJ,KZF1,INPP5D,ITPKB1,TKT,OXCREBBP,PRKDC,CD8B,BCL11B,TNFSF14,MARK2,PPP3CB,LY9,SLA,THEMISHLA-A,BCL2,RUNX3,SOC1,PTPRC,CD247,SH2D1A,ERN1,PGAP3,TBX21,LYST                                                                                                                                                                                                                                                                                               |
| Abnormal morphology of leukocytes             | 144E-10 |      | IRF1,PML,FTL,PRKQ,FCER1G,RASGRP1,IL2RG,GAT A3,MALT1,SYK,CD8A,PKI3AP1,IL7R,LCK,CBLB,LAT,CYTI,PRKCI,LYT1,ASXL1,IL7R,CYLD,GRAP2,CD3E,IL2,TXNIP,SMPD1,PRDM1,PSTPIP1,BAD,BATF,CDKN2B,BAX,FCMR,ETS1,STAT5B,FAS,STK4,EP515,FLT3LG,SEMA4D,RHOH,IFNG,TNFAIP8L2,IL2RB,PTPN22,TAP1,LCJ,KZF1,INPP5D,ITPKB1,TKT,OXCREBBP,PRKDC,CD8B,BCL11B,ATM,MARK2,TNFSF14,PPP3CB,LY9,SLA,THEMISHLA-A,BCL2,RUNX3,SOC1,PTPRC,CD247,SH2D1A,ERN1,PGAP3,TBX21,CASP8                                                                                                                                                                                                                                                         |
| Abnormal morphology of T lymphocytes          | 148E-09 |      | IRF1,RHOH,PRKQ,PTPN22,FCER1G,TAP1,RASGRP1,IL2RG,MALT1,CD8A,ITPKB1,IL7R,LCK,TKT,OX,CRUB,CYTI,PRKCI,LAT,CD3E,GRAP2,IL2,CD8B,BCL11B,MARK2,TNFSF14,PPP3CB,LY9,SLA,THEMISHLA-A,BCL2,RUNX3,SOC1,PTPRC,BAK,STAT5B,FAS,ETS1,CD247,SH2D1A,PGAP3,TBX21                                                                                                                                                                                                                                                                                                                                                                                                                                                 |
| Abnormal morphology of immune system          | 213E-08 |      | IRF1,PML,FTL,PRKQ,FCER1G,RASGRP1,IL2RG,MALT1,GATA3,SYK,CD8A,PKI3AP1,IL7R,LCK,CBLB,LAT,CYTI,PRKCI,ASXL1,IL7R,CYLD,GRAP2,CD3E,IL2,TXNIP,SMPD1,PRDM1,PSTPIP1,GBA,BAD,DOCK11,BATF,CDKN2B,BAX,FCMR,STAT5B,ETS1,FAS,STK4,EP515,FLT3LG,SEMA4D,RHOH,IFNG,TNFAIP8L2,IL2RB,PTPN22,TAP1,LCJ,KZF1,INPP5D,ITPKB1,STAT5A,ITK,OXCREBBP,PRKDC,PTGDR,CD8B,BCL11B,TNFSF14,MARK2,ATM,PPP3CB,LY9,NR1H2,SLA,THEMISHLA-A,SOAT1,BCL2,RUNX3,SOC1,PTPRC,CD247,SH2D1A,ERN1,PGAP3,TBX21,CASP8                                                                                                                                                                                                                           |
| Development of natural killer T lymphocytes   | 268E-08 |      | CYLD,IRF1,KRAS,NOTCH1,STIM2,ZBTB16,PRKQ,RICTOR,KIKKB,MALT1,FYN,TNFAIP3,TK,DGKZ,ETS1,SH2D1A,PKI3C3                                                                                                                                                                                                                                                                                                                                                                                                                                                                                                                                                                                            |



|                                                       |          |                                                                                                                                                                                                                                                                                                                                                                                                                                                                                                                     |
|-------------------------------------------------------|----------|---------------------------------------------------------------------------------------------------------------------------------------------------------------------------------------------------------------------------------------------------------------------------------------------------------------------------------------------------------------------------------------------------------------------------------------------------------------------------------------------------------------------|
| Morphology of lymphoid tissue                         | 5.11E-08 | RHOH,CD3E,GRAP2,EP300,IL2RB,PTPN22,SLA,RASGRP1,LCP1,MALT1,CD8A,BCL2L1,CK,BATF,PTPRC,STAT5B,SH2D1A,CD247,CASP8,STK4,EP515,PIK3CJL1T8                                                                                                                                                                                                                                                                                                                                                                                 |
| Lack of lymphocytes                                   | 9.17E-08 | IL2RB,FCER1G,TAP1,IL2RG,KZFP1,MALT1,SVK,CD8A,PIK3AP1,ITPKB,IL7R,LCK,CREBBP,LAT,PRKDC,LTB,CD3E,BCL11B,PRDM1,HLA-A,BATF,ETS1,SH2D1A,CD247,TBX21                                                                                                                                                                                                                                                                                                                                                                       |
| Lymphopenia                                           | 1.57E-07 | ICOS,IL2RB,FCER1G,TAP1,IL2RG,KZFP1,MALT1,SVK,CD8A,PIK3AP1,ITPKB,IL7R,LCK,CREBBP,LAT,PRKDC,LTB,CD3E,BCL11B,PRDM1,HLA-A,BATF,ETS1,CD247,SH2D1A,TBX21                                                                                                                                                                                                                                                                                                                                                                  |
| Morphology of leukocytes                              | 1.77E-07 | IRF1,PML,FIT1,PRKQ,CDKN2A,FCER1G,RASGRP1,IL2RG,GATA3,MALT1,SVK,CD8A,PIK3AP1,IL7R,LCK,CHL1,LAT,PRKCHL,CYTP,ASXL1,LTB,CYLD,GRAP2,CD3E,IL2,TXNIP,SNMPD1,CD46,PRDM1,PTSTP1,GBA,BAD,NRAS,DOCK11,BATF,CDKN2B,BCL2L1,BAFF,FCMR,STAT5B,FAS,ETS1,STK4,EP515,FLT3LG,SEMA4D,RH0H,TNFAIP8L2J,FNG,IL2RB,PTPN22,TAP1,CTCF,LCP1,KZFP1,NPP5D,ITPKB,STAT5A,ITK,TOX,CREBBP,PRKDC,PTGR,CCR2,TRAF3,CD8B,BCL11B,TNFSF14,MARK2,ATM,PPP3C1L,Y9,NR1H2,SLA,THEMIS,HLA-ASOAT1,BCL2,RUNX3,SOCS1,PTPRC,CD247,ERN1,SH2D1A,PGAP3,TBX21,CASP8,LYST |
| Lack of T lymphocytes                                 | 5.05E-06 | CD3E,BCL11B,FCER1G,TAP1,IL2RG,HLA-A,CD8A,ITPKB,IL7R,LAT,SH2D1A,CD247,TBX21                                                                                                                                                                                                                                                                                                                                                                                                                                          |
| Function of natural killer cells                      | 1.09E-05 | TXNIP,STAT4,ICOS,IFNG,KLRB1,PRF1,FCER1G,TAPB,CD96,FYN,PTPRC,ETS1,LAG3,SH2D1A,CD247,TBX21,GADD45G                                                                                                                                                                                                                                                                                                                                                                                                                    |
| Abnormal morphology of lymphoid organ                 | 3.06E-05 | GRAP2,CD3E,RHOH,EP300,PTPN22,SLA,RASGRP1,MALT1,CD8A,BCL2L1,CK,STAT5B,CD247,CASP8                                                                                                                                                                                                                                                                                                                                                                                                                                    |
| Abnormal morphology of hematopoietic progenitor cells | 5.32E-05 | RHOH,CD3E,GRAP2,PTPN22,SLA,RASGRP1,KZFP1,MALT1,SVK,CD8A,LCK,CREBBP,PTPRC,STAT5B,CD247,ERN1,PRKDC                                                                                                                                                                                                                                                                                                                                                                                                                    |
| Abnormal morphology of follicular B lymphocytes       | 7.54E-05 | BATF,IL2RB,PTPRC,SH2D1A,EP515,STK4,LTB,CP1                                                                                                                                                                                                                                                                                                                                                                                                                                                                          |
| Abnormal morphology of thoracic cavity                | 7.63E-05 | MALT1,GRAP2,CD3E,RHOH,CD8A,LCK,PTPN22,STAT5B,CD247,SLA,CD69,RASGRP1                                                                                                                                                                                                                                                                                                                                                                                                                                                 |
| Immune mediated inflammatory disease                  | 9.33E-05 | E1F2AK2,NCOR2,RAB1B,ICOS,TNFR,GB,FCER1G,GATA3,RNF14,TMF1,CXCR4,CCDC59,STING1,STAT3,HLA,DRB5,MLLT6,TRAF1,DTX3L,NF2B3,DTX3L,NR4A2,S1PR1,SGZ9,DNAJA4,IL2,TRIM22,IRN1,CCL5,WNK1,PRDM1,DUSP2,ADSS,CD69,ISP15,PIF1,RNF149,CDKN1B,ADGRE5,GNLY,BCL2L1,BAFF,STK17B,RCSD1,JunB,F11R,IFNG,IFNG3,ISELENOX,PDE4B,HSF2L1,CP1,KZFP1,CCND3,INPP5D,FKBP5,DEDD2,HSR,ASL,AMF6,EHD4,SAFB,NONO,PPP2CA,DCUN1D1,EP300,IY9,RABGAP1L,POCD1,NUMB,BST2,TNFAIP3,MAP3K2,GZMA,BCL2,RUNX3,SOCS1,PTPRC,TBHG1,CASP8,TAGAP1,DHB                       |
| Abnormal morphology of B lymphocytes                  | 1.04E-04 | SEMA4D,FLT3LG,CYLD,CD3E,IL2RB,PRDM1,IL2RG,KZFP1,CP1,MALT1,SVK,PIK3AP1,BATF,CREBBP,PTPRC,FCMR,BAX,ETS1,SH2D1A,ERN1,PRKDC,STK4,EP515,LTB                                                                                                                                                                                                                                                                                                                                                                              |
| Abnormal morphology of body cavity                    | 1.04E-04 | GRAP2,CD3E,RHOH,EP300,PTPN22,SLA,CD69,RASGRP1,MALT1,CD8A,BCL2L1,CK,STAT5B,CD247,CASP8                                                                                                                                                                                                                                                                                                                                                                                                                               |
| Morphology of lymph follicle                          | 1.04E-04 | BATF,IL2RB,PTPRC,SH2D1A,STK4,PIK3CJ,EP515,LTB,CP1                                                                                                                                                                                                                                                                                                                                                                                                                                                                   |
| Abnormal morphology of thymus gland                   | 1.20E-04 | MALT1,CD3E,GRAP2,RHOH,CD8A,LCK,PTPN22,STAT5B,CD247,SLA,RASGRP1                                                                                                                                                                                                                                                                                                                                                                                                                                                      |
| Differentiation of natural killer cells               | 1.44E-04 | FLT3LG,IRF1,SLAMF1,HCTD1,KZFP1,INPP5D,STAT5A,SP9,TOX,SLAMF6,KAT7,PTPRC,STAT5B                                                                                                                                                                                                                                                                                                                                                                                                                                       |
| Abnormal quantity of lymphocytes                      | 1.55E-04 | MS4A1,CYLD,IRF1,RHOH,IL2,ICOS,IL2RG,SYK,SIT1,ARHGFB6,CD8A,ARHGEP1L,CK,TOX,PTPRC,STAT5B,POLM,SH2D1A,CD247,PRKDC                                                                                                                                                                                                                                                                                                                                                                                                      |
| Abnormal morphology of CD8+ T lymphocyte              | 1.87E-04 | CD3E,IL2,CD8B,PPP3C1,CR,TAP1,HLA-A,CD8A,ITPKB,BCL2,RUNX3,TOX,LAT,CYTP,ETS1,TBX21                                                                                                                                                                                                                                                                                                                                                                                                                                    |
| Apoptosis of effector T regulatory cells              | 2.24E-04 | IL2,TLN1,PTPN22,POCD1                                                                                                                                                                                                                                                                                                                                                                                                                                                                                               |
| Arrest in differentiation of T lymphocytes            | 2.63E-04 | GRAP2,CD3E,RHOH,ITPKB,IL7R,CD3D,PTPRC,LAT,NCOR1,PRKDC,ZAP70                                                                                                                                                                                                                                                                                                                                                                                                                                                         |
| Rheumatic Disease                                     | 2.77E-04 | E1F2AK2,NCOR2,RAB1B,TNRC6B,ICOS,RNF14,TMF1,CCDC59,STING1,STAT3,CXCR4,MLLT6,TRAF1,DTX3L,NF2B3,DTX3L,NR4A2,S1PR1,SGZ9,DNAJA4,CD3E,IL2,TRIM22,CCL5,TCF7,WNK1,KRKB,PRDM1,DUSP2,ADSS,CD69,ISP15,RNF149,CDKN1B,ADGRE5,GNLY,BCL2L1,BAFF,STK17B,RCSD1,F11R,IFNG,LCP1,KZFP1,CCND3,MEIT1,IY9,NPP5D,FKBP5,DEDD2,HSR,ASL,AMF6,EHD4,SAFB,CD27,MAP3K3,NONO,SGGR,DCUN1D1,IY9,RABGAP1L,NUMB,BST2,TNFAIP3,MAP3K2,GZMA,BCL2,RUNX3,SOCS1,PTPRC,TBHG1,TAGAP1,DHB                                                                        |
| Lack of CD8+ T lymphocyte                             | 4.52E-04 | CD3E,HLA-A,CD8A,ITPKB,LAT,TAP1                                                                                                                                                                                                                                                                                                                                                                                                                                                                                      |
| Eosinophilia                                          | 5.31E-04 | CXCR4,STAT3,SVK,CD40LG,IFNG,CD7,CD3G,CD5,KRKB,PPP3CA,CD247                                                                                                                                                                                                                                                                                                                                                                                                                                                          |
| Systemic autoimmune syndrome                          | 5.51E-04 | E1F2AK2,NCOR2,RAB1B,TNRC6B,ICOS,RNF14,TMF1,CCDC59,STING1,STAT3,CXCR4,MLLT6,TRAF1,DTX3L,NF2B3,DTX3L,NR4A2,S1PR1,SGZ9,DNAJA4,CD3E,IL2,TRIM22,CCL5,TCF7,WNK1,KRKB,PRDM1,DUSP2,ADSS,CD69,ISP15,RNF149,CDKN1B,ADGRE5,GNLY,BCL2L1,BAFF,STK17B,RCSD1,F11R,IFNG,LCP1,KZFP1,CCND3,MEIT1,IY9,NPP5D,FKBP5,DEDD2,HSR,ASL,AMF6,EHD4,SAFB,CD27,MAP3K3,NONO,SGGR,DCUN1D1,IY9,RABGAP1L,NUMB,BST2,CD40LG,TNFAIP3,MAP3K2,GZMA,BCL2,RUNX3,SOCS1,PTPRC,TBHG1,CASP8,TAGAP1,DHB                                                           |
| Function of CD4+ T-lymphocytes                        | 6.81E-04 | IL2,SLAMF1,ITGAL,TNFAIP8L2,ICOS,PRKQ,PPP3C1,PTPN22,FCER1G,CD44,CD69,FYJ,NPP5D,LAG3,SH2D1A,CD27,PGAP3,TBX21,STK4                                                                                                                                                                                                                                                                                                                                                                                                     |
| Abnormal morphology of double-negative T lymphocyte   | 6.98E-04 | MALT1,CD3E,RHOH,GRAP2,CD8A,LCK,STAT5B,CD247                                                                                                                                                                                                                                                                                                                                                                                                                                                                         |
| Abnormal morphology of gamma-delta T lymphocytes      | 6.98E-04 | IL2,IL7R,TNFSF14,ITK,LAT,FCER1G,CD247,IL2RG                                                                                                                                                                                                                                                                                                                                                                                                                                                                         |

|                                                                 |          |                                                                                                                                                                                                                                                                                                                                                                         |
|-----------------------------------------------------------------|----------|-------------------------------------------------------------------------------------------------------------------------------------------------------------------------------------------------------------------------------------------------------------------------------------------------------------------------------------------------------------------------|
| Function of cytotoxic T cells                                   | 860E-04  | GSK3B,IL2,ITGAL,CD8B,IFNG,TNFAIP8L2,TNFSF14,PRP1,TAPEP,HLA-A,CD8A,SH2D1A,CD27,TBX21                                                                                                                                                                                                                                                                                     |
| Clearance of neutrophils                                        | 892E-04  | CCR2,GPR132,HMGB1,CD44,XXR8,ANXA1                                                                                                                                                                                                                                                                                                                                       |
| Exhaustion of CD8+ T lymphocyte                                 | 1.01E-03 | AN06,IL2RB,TNFRSF10,CD27                                                                                                                                                                                                                                                                                                                                                |
| Familial autoimmune disease                                     | 1.01E-03 | CD40LG,ICOS,FAS,PPDC1                                                                                                                                                                                                                                                                                                                                                   |
| Arrest in differentiation of leukocytes                         | 1.07E-03 | RHOH,GRAP2,CD3EJAK1,PIK3R1,KZF3,IL2RG,SYK,FYN,ITPKB,CD3D,IL7R,PTPRCNCOR1,LAT,PRKDC,CASP9,ZAP70                                                                                                                                                                                                                                                                          |
| Lack of gamma-delta T lymphocytes                               | 1.11E-03 | IL7R,FCER1G,LAT,CD247,IL2RG                                                                                                                                                                                                                                                                                                                                             |
| Systemic lupus erythematosus                                    | 1.40E-03 | EIF2AK2,NCOR2,TRIM22,IFNG,ICOSL1,YRARGAP1L,CCND3,BST2,STAT3,CDKN1B,BCL2,SLAMF6,BAK,BCL2L1,DTX3L,ISG20                                                                                                                                                                                                                                                                   |
| Inflammation of joint                                           | 1.76E-03 | RAB18,TNRC6B,ICOS,SIPAI,NCF1,RNF14,LPINI,TMFI,CDC59,STING1,STAT3,CXCR4,MLLT6,PRKCB,TRAF1,ZNF326,NR4A2,S1PR1,DNAJA4,CD3E,IL2,CC15,TCF7,WNK1,KIKKB,PRDM1,DUSP2,CD69,ADSS2,USP15,RNF149,ADGRE5,GNLY,RCSD1,STK17B,F11R,IFNG,ICP1,KZFP1,CCND3,METT19,FKBP5,DEDD2,HSPA8,EHD4,SAFB,CD27,NONO,MAP3K3,SGIRL,DCUN1D1,NUMB,TNFAIP3,MAP3K2,GZMA,RUNX3,SOCS1,PTPRC,TB RG1,TAGAPL,DHB |
| Cell survival of CD4+ T-lymphocytes                             | 1.83E-03 | PIM1,IL2RG,PYCARD                                                                                                                                                                                                                                                                                                                                                       |
| Contact growth inhibition of T lymphocytes                      | 1.83E-03 | LCK,PTPRC,ZAP70                                                                                                                                                                                                                                                                                                                                                         |
| Generation of CD8+ T lymphocyte                                 | 1.83E-03 | ITGAL,HLA-A,IFNG                                                                                                                                                                                                                                                                                                                                                        |
| Insulin-dependent diabetes mellitus secretory diarrhea syndrome | 1.83E-03 | CD40LG,ICOS,PPDC1                                                                                                                                                                                                                                                                                                                                                       |
| Selection of natural killer T lymphocytes                       | 1.83E-03 | ELF1,ELK4,ELK1                                                                                                                                                                                                                                                                                                                                                          |
| Hypereosinophilia                                               | 1.97E-03 | CXCR4,STAT3,CD40LG,CD7,CD3G,CD5,KIKKB,PPP3CA,CD247                                                                                                                                                                                                                                                                                                                      |
| Arrest in differentiation of lymphocytes                        | 2.39E-03 | RHOH,GRAP2,CD3EJAK1,KZF3,PIK3R1,IL2RG,SYK,FYN,ITPKB,CD3D,IL7R,PTPRCNCOR1,LAT,PRKDC,ZAP70                                                                                                                                                                                                                                                                                |
| Clearance of leukocytes                                         | 2.60E-03 | PPARD,CCR2,HMGB1,GPR132,CD44,XXR8,ANXA1                                                                                                                                                                                                                                                                                                                                 |
| Abnormal morphology of natural killer T lymphocytes             | 2.74E-03 | ITK,SH2D1A,TBX21,IL2RG                                                                                                                                                                                                                                                                                                                                                  |
| Deficiency of lymphocytes                                       | 2.74E-03 | BCL2,EP300,PTPRC,GIMAP1                                                                                                                                                                                                                                                                                                                                                 |
| Lack of B-1a lymphocytes                                        | 2.74E-03 | MALT1,PIK3AP1,LETS1,KZF1                                                                                                                                                                                                                                                                                                                                                |
| Lymphoid immunodeficiency                                       | 2.74E-03 | BCL2,EP300,FAS,GIMAP1                                                                                                                                                                                                                                                                                                                                                   |
| Cell-cell adhesion of leukocytes                                | 2.88E-03 | SYK,ITGAL,F11R,CD40LG,CCL5,ICOS,ADGRE5,ITGA4,TNIP1,PTPRC                                                                                                                                                                                                                                                                                                                |
| Abnormal quantity of leukocytes                                 | 3.23E-03 | M54A1,CYLD,IRF1,RHOH,IL2,ICOS,IL2RG,KZF1,SYK,SIT1,CD6A,ARHGAP6,ARHGAP1,LCK,TOX,PTPRC,STAT5B,POLM,SH2D1A,CD247,PRKDC                                                                                                                                                                                                                                                     |
| Abnormal morphology of natural killer cells                     | 3.25E-03 | INPP5D,TXNIP,IFNG,LCK,IL2RB,CD247,IL2RG,KZF1                                                                                                                                                                                                                                                                                                                            |
| Ret Syndrome                                                    | 3.26E-03 | CCL5,MBPJFNG,NKG7,YBX3,ZNF131,TA99B,FCER1G,CD6,SLC16A1,NCRC3,CASP6,CXCR6,PTTPNC1,HIMOX1,BTN3A1,ABLIM1,DNAJB6,XCL1,TBX21,DUSP4,ERAP2                                                                                                                                                                                                                                     |
| Insulin-dependent diabetes mellitus                             | 4.05E-03 | CD40LG,ICOS,IFNG,PTPRC,PPDC1                                                                                                                                                                                                                                                                                                                                            |

|                                                    |          |                                                                                                                          |
|----------------------------------------------------|----------|--------------------------------------------------------------------------------------------------------------------------|
| Function of mast cells                             | 4.11E-03 | RASGRP4FCER1G,PIM1,ABCC1,DHSP2,RASGRP1JL2RG,STAT5A,CBLB,DGKZLAT,STAT5B,PTGDR                                             |
| Abnormal number of leukocytes                      | 4.13E-03 | MS4A1,CYLD,IRF1,ICOS,IL2RG,IKZF1,SYK,ARHGAP6,CDBA1,CK1,TOX,PTPRC,POLM,CD247,PRKDC                                        |
| Development of gamma-delta T lymphocytes           | 4.18E-03 | ITGAL,NOTCH1,CD3G,CD3D,SH2D1A,IL2RG                                                                                      |
| Atopic dermatitis                                  | 4.55E-03 | RRN3,ZNF331,SELENOK,FCER1G,PDE4B,DUSP2,HSF2,CXCR4,TNFAIP3,PHF1,HLA-DRB5,AHNAK,INBN,NR4A2                                 |
| Dysfunction of lymphocytes                         | 4.82E-03 | MS4A1,CYLD,TNFAIP8L2JFNG,TLN1,ICOS,POLH,MAP3K14,LAX1,PIK3R1,CD6,GBA,BADELF1,CXCR4,NPP5D,ARHGAP6,RGS1,PTPRC,STK4,TBC1D10C |
| Development of invariant natural killer T cells    | 5.39E-03 | KRAS,STM2,ITK,RICTOR,IKKKB,DGKZ,PIK3C3                                                                                   |
| Glucose metabolism disorder                        | 5.39E-03 | PPARD,CD40LG,CREB1,ICOS,IFNG,PTPRC,PCPD1                                                                                 |
| Lack of B lymphocytes                              | 5.76E-03 | MALT1,SYK,PIK3AP1,BATF,CREBBP,ETS1,PRDM1,PRKDC1L2RG,ITR,IKZF1                                                            |
| Abnormal morphology of marginal-zone B lymphocytes | 5.77E-03 | IL2RB,EP515,STK4,LCF1                                                                                                    |
| Activation of effector T lymphocytes               | 5.77E-03 | MALT1,DEF6,BAKZAP70                                                                                                      |
| Humoral immunodeficiency                           | 5.77E-03 | IL2,BCL2,EP300,GIMAP1                                                                                                    |
| Development of pre-T lymphocytes                   | 5.98E-03 | CBFB,JL2,CXCR4,CD3G,RICTOR,IL2RB,RASGRP1,IL2RG                                                                           |
| Allergy                                            | 6.01E-03 | RRN3,ZNF331,SELENOK,FCER1G,PDE4B,PCD1,DUSP2,HSF2,GATA3,CXCR4,TNFAIP3,PHF1,HLA-DRB5,AHNAK,INBN,NR4A2                      |
| Binding of interferon-gamma activated sequence     | 6.66E-03 | IL2,IFNG,CD2                                                                                                             |
| Binding of keratinocytes                           | 6.66E-03 | ITGAL,IFNG,CD44                                                                                                          |
| Cell death of effector memory helper T cells       | 6.66E-03 | IL2,SMPD1,FAS                                                                                                            |
| Cell-cell adhesion of granulocytes                 | 6.66E-03 | CD40LG,ICOS,ADGRE5                                                                                                       |
| Contact growth inhibition of pre-B lymphocytes     | 6.66E-03 | CDKN1B,IKZF3,IKZF1                                                                                                       |
| Deficiency of B lymphocytes                        | 6.66E-03 | BCL2,EP300,GIMAP1                                                                                                        |
| Dysfunction of T lymphocytes                       | 6.66E-03 | ICOS,TLN1,GBA                                                                                                            |
| Influx of T lymphocytes                            | 6.66E-03 | IFNG,STM2,ITK                                                                                                            |
| Lack of natural killer T lymphocytes               | 6.66E-03 | SH2D1A,TBX21,IL2RG                                                                                                       |
| Maintenance of regulatory T lymphocytes            | 6.66E-03 | IL2,ICOS,PIK3C3                                                                                                          |
| Number of iNKT2 cells                              | 6.66E-03 | TNFAIP3,BCL11B,LLY9                                                                                                      |
| Survival of gamma-delta T lymphocytes              | 6.66E-03 | IL2,BCL2,IL2RG                                                                                                           |

|                                                   |          |                                                                                                                                                                                                                                                                                                         |
|---------------------------------------------------|----------|---------------------------------------------------------------------------------------------------------------------------------------------------------------------------------------------------------------------------------------------------------------------------------------------------------|
| Abnormal morphology of CD4+ T-lymphocytes         | 7.54E-03 | GRAP2,CD3E,LT,FKB,BCL2,MARK2,PPP3CB,PTPRCLAT,RASGRP1,IL2RG                                                                                                                                                                                                                                              |
| B cell cancer                                     | 1.04E-02 | MS4A1,CSK3B,PAG1,BUB3,PRF1,PM1,POCD1,CD47,BTG2,PARP1,CD40LG,HIPK3,BCL2,CASP3,NIBAN1,FCMR,BCL2L1,CD27,CASP8                                                                                                                                                                                              |
| Cell death of peripheral T lymphocyte             | 1.04E-02 | GIMAP4,EZR,FAS,GIMAP1                                                                                                                                                                                                                                                                                   |
| Condensation of chromatin                         | 1.04E-02 | IFNG,DFFA,FAS,NCAPH2                                                                                                                                                                                                                                                                                    |
| Development of alpha-beta T lymphocytes           | 1.04E-02 | FYN,NOTCH1,CD3G,LCK                                                                                                                                                                                                                                                                                     |
| Development of intraepithelial lymphocytes        | 1.04E-02 | IRF1,STIM2,LCK,PTPRC                                                                                                                                                                                                                                                                                    |
| Selection of B lymphocytes                        | 1.04E-02 | SYK,BAX,FASZAP70                                                                                                                                                                                                                                                                                        |
| Development of Th1 cells                          | 1.25E-02 | GATA3,IL2,STAT4,IFNG,PRKCQ,PRKAA1                                                                                                                                                                                                                                                                       |
| Development of pro-T lymphocytes                  | 1.31E-02 | CIFB,IL2,CXCR4,CD3G,RICTOR,IL2RB,RASGRP1                                                                                                                                                                                                                                                                |
| Abnormal function of B lymphocytes                | 1.32E-02 | MS4A1,CVLDL,TNFAIP8L2,FNG,IGOS,POLH,MAP3K14,LAX1,PIK3R1,CD6,BADELF1,CXCR4,INPP5D,ARHGAP6,RGS1,PTPRC,STK4,TRC1D10C                                                                                                                                                                                       |
| Homeostasis of B lymphocytes                      | 1.38E-02 | TNFAIP3,IGOS,CH2,PPP2R3C,BCL2,DOCK11,RICTOR,CASP3,IKKB,BAX                                                                                                                                                                                                                                              |
| Chronic inflammatory disorder                     | 1.49E-02 | RAB1B,TNRC6B,JCOS,RNF14,TMFI,CCDC59,STING1,STAT3,CXCR4,MLL7,TRAF1,ZNF326,NR4A2,SIPR1,DNAJA4,IL2,CC15,WNK1,PRDM1,DUSP2,CD69,AOS2,USP15,RNF149,ADGRG5,GNLY,RCS1,STK17B,F11R,IFNG,ICP1,IKZF1,FKBP5,DEDI2,HSPAB,EH1D4,SAPB,NONO,DCUN1D1,BCL11B,POCD1,NUMB,TNFAIP3,MAP3K2,GZMA5,OCUS1,PTPRC,TBRG1,TAGAP3,DHB |
| Accumulation of naive T lymphocytes               | 1.50E-02 | BCL2,IL2RG                                                                                                                                                                                                                                                                                              |
| Accumulation of reactive oxygen species           | 1.50E-02 | IL2,PIK3C3                                                                                                                                                                                                                                                                                              |
| Activation of effector memory cytotoxic T cells   | 1.50E-02 | MALT1,ZAP70                                                                                                                                                                                                                                                                                             |
| Activation of protein                             | 1.50E-02 | S0CS1,PTPRC                                                                                                                                                                                                                                                                                             |
| Adhesion of keratinocytes                         | 1.50E-02 | IFNG,CD44                                                                                                                                                                                                                                                                                               |
| Apoptosis of Th17 cells                           | 1.50E-02 | IL2,CD6                                                                                                                                                                                                                                                                                                 |
| Apoptosis of central T reg cells                  | 1.50E-02 | TLN1,PTPN22                                                                                                                                                                                                                                                                                             |
| Apoptosis of conventional dendritic cells         | 1.50E-02 | FLT3LG,IL2                                                                                                                                                                                                                                                                                              |
| Apoptosis of large granular lymphocytes           | 1.50E-02 | STAT3,FAS                                                                                                                                                                                                                                                                                               |
| Arrest in development of alpha-beta T lymphocytes | 1.50E-02 | FYN,LCK                                                                                                                                                                                                                                                                                                 |
| Autophagy of T lymphocytes                        | 1.50E-02 | ATG5,PIK3C3                                                                                                                                                                                                                                                                                             |
| Cell division of memory T lymphocytes             | 1.50E-02 | IL2,IL2RB                                                                                                                                                                                                                                                                                               |
| Cell spreading of natural killer cells            | 1.50E-02 | ITGAL,RAP1B                                                                                                                                                                                                                                                                                             |

|                                                             |          |                  |
|-------------------------------------------------------------|----------|------------------|
| Clonal expansion of thymocytes                              | 1.50E-02 | SYKZAP70         |
| Cytolysis of intraepithelial lymphocytes                    | 1.50E-02 | LCKPTPRC         |
| Cytotoxicity of memory T lymphocytes                        | 1.50E-02 | IFNG,CD27        |
| Degranulation of CD8+ T lymphocyte                          | 1.50E-02 | LAG3,POCD1       |
| Development of memory natural killer cells                  | 1.50E-02 | STAT3,IL2RB      |
| Development of pro T2 thymocytes                            | 1.50E-02 | IL2,IL2RB        |
| Development of type II natural killer T cells               | 1.50E-02 | ZBTB16,SH2D1A    |
| Distension of endoplasmic reticulum                         | 1.50E-02 | FAS,CD2          |
| Exocytosis of tertiary granules                             | 1.50E-02 | VAMP2,STX4       |
| Expansion of CD56bright natural killer cells                | 1.50E-02 | IL2,IL2RB        |
| Fragmentation of nucleus                                    | 1.50E-02 | DFFA,CASP3       |
| Function of bone marrow-derived mast cells                  | 1.50E-02 | RASGRP4,RASGRP1  |
| Hyperplasia of regulatory T lymphocytes                     | 1.50E-02 | MAP3K14,TNFRSF18 |
| Hyperplasia of thymocytes                                   | 1.50E-02 | MAP2K7,IKZF1     |
| Immunostimulatory potential of conventional dendritic cells | 1.50E-02 | FLT3LG,IL2       |
| Influx of CD4+ T-lymphocytes                                | 1.50E-02 | IFNG,STIM2       |
| Influx of eosinophils                                       | 1.50E-02 | LY96,ITK         |
| Inhibition of lymphokine activated killer cells             | 1.50E-02 | CLEC2D,MLRB1     |
| Maturation of inflammatory monocytes                        | 1.50E-02 | IFNG,GPR132      |
| Maturation of phagolysosome                                 | 1.50E-02 | SLAMF1,FAS       |
| Neck neoplasm                                               | 1.50E-02 | PTPRC,CANXA1     |
| Phagocytosis of bone marrow-derived neutrophils             | 1.50E-02 | CD47,HMGB1       |
| Positive selection of B lymphocytes                         | 1.50E-02 | SYKZAP70         |
| Positive selection of natural killer T lymphocytes          | 1.50E-02 | ELK4,ELK1        |
| Quantity of lymphoid dendritic cells                        | 1.50E-02 | FLT3LG,IKZF1     |

|                                                             |         |                                |
|-------------------------------------------------------------|---------|--------------------------------|
| Rejection of lymphokine activated killer cells              | 150E-02 | IL2,KLRB1                      |
| Release of B lymphocytes                                    | 150E-02 | ARHGEP1,SIPR1                  |
| Release of prostaglandin E2                                 | 150E-02 | IFNG,IRF2                      |
| Replication of Dengue virus 2                               | 150E-02 | STING1,HMGB1                   |
| Repopulation by blood cells                                 | 150E-02 | FLT3LG,DOCK2                   |
| Switching of T lymphocytes                                  | 150E-02 | IL2,CD46                       |
| T-cell-independent type 2 extrafollicular antibody response | 150E-02 | SH3KBP1,KBKB                   |
| Transendothelial migration of effector memory T lymphocytes | 150E-02 | ZAP70,MYH9                     |
| Turnover of T lymphocytes                                   | 150E-02 | IL2,GRAP2                      |
| Abnormal morphology of B-1 lymphocytes                      | 151E-02 | MALT1,SEMA4D,PK3AP1,ETS1,KZF1  |
| Abnormal morphology of alpha-beta intraepithelial T cell    | 151E-02 | IL2,LCK,PTPRC,CD247,IL2RG      |
| Arrest in cell cycle progression of T lymphocytes           | 151E-02 | ATM,CDKN2A,BCL2L1,LAG3,SKIL    |
| Abnormal morphology of regulatory T lymphocytes             | 151E-02 | THEMIS1L2,TOX                  |
| Aneuploidy of thymocytes                                    | 151E-02 | BCL2,ATM,BAX                   |
| Cellular infiltration by CD8+ T lymphocyte                  | 151E-02 | NR1H2,LAG3,PDCD1               |
| Conversion of induced regulatory T-lymphocyte               | 151E-02 | IL2,PARP1,BCL11B               |
| Modification of genomic DNA                                 | 151E-02 | IRF1,PARP1,ATRX                |
| Phospholipid flip-flop of phosphatidylserine                | 151E-02 | IFNG,FASCD2                    |
| Quantity of central memory cytotoxic T cells                | 151E-02 | MALT1,CD40LG,ICOS              |
| Survival of intraepithelial lymphocytes                     | 151E-02 | BCL2,IL2RB,BCL2L1              |
| Immunodeficiency                                            | 168E-02 | IL2,BCL2,EP300,FASCASP8,GIMAP1 |
| Abnormal morphology of effector T lymphocytes               | 170E-02 | PRKQ,PRKCH,FCER1G,CD247        |
| Degranulation of T lymphocytes                              | 170E-02 | VT1B,RAB27A,LAG3,PDCD1         |
| Immune response of CD8+ T lymphocyte                        | 170E-02 | PARP1,CD27,TBX21,HSD1L         |
| Lack of natural killer cells                                | 170E-02 | LCK,IL2RB,IL2RG,KZF1           |

|                                                 |          |                                                                                                                                                                                                                                                                                                |
|-------------------------------------------------|----------|------------------------------------------------------------------------------------------------------------------------------------------------------------------------------------------------------------------------------------------------------------------------------------------------|
| Neoplastic cell transformation of B lymphocytes | 1.70E-02 | INPP5DJL7R,CDKN2A,BCL2L1                                                                                                                                                                                                                                                                       |
| Proliferation of plasma cells                   | 1.70E-02 | CD40LG,TNFAIP3,PRDM1,FAS                                                                                                                                                                                                                                                                       |
| Size of T lymphocytes                           | 1.70E-02 | IL2,TRAF3IP3,BCL2L1,IL2RG                                                                                                                                                                                                                                                                      |
| Psoriatic arthritis                             | 1.81E-02 | CCND3,SGIRR,METTL9,IPIN1,STAT3,TCF7,SIPA1,RUNX3,PRKCB,IKBKB,CD27,MAP3K3                                                                                                                                                                                                                        |
| Signaling of T lymphocytes                      | 2.12E-02 | IL2,CD5,IL2RB,PTPRC,IL2RG                                                                                                                                                                                                                                                                      |
| Transformation of B lymphocytes                 | 2.12E-02 | INPP5DJL7R,CDKN2A,BCL2L1,JUNB                                                                                                                                                                                                                                                                  |
| Rheumatoid arthritis                            | 2.39E-02 | RAB1B,F11R,IFNG,TNRC6B,ICOSL,CPL1,KZP1,IRNF14,TMPL,CCDC59,STING,LCXCR4,FRBP5,DEDD2,HSPA8,MLL7,G,TRAF1,ZNFX26,EHD4,SAFB,NONO,NR4A2,SIPR1,DNAJA4,IL2,DCUIN1,D1,CCL5,WNK1,PRDM1,DUSP2,CD69,ADSS2,NUMB,USP15,TNFAIP3,MAP3K2,GZMA,IRNF149,ADGRES,GNLY,SOC1,PTPRCT,IRG1,KCSD1,STRK17B,TA<br>GAPL,DHB |
| Development of Single positive thymocytes       | 2.56E-02 | THEMIS,CD3G,RICTOR,IKBKB                                                                                                                                                                                                                                                                       |
| Differentiation of naive B cells                | 2.56E-02 | IL2,STAT3,SYK,CD40LG                                                                                                                                                                                                                                                                           |
| Expansion of Th1 cells                          | 0.0256   | PARP1,CD40LG,ICOS,IFNG                                                                                                                                                                                                                                                                         |
| Function of natural killer T lymphocytes        | 0.0256   | FCER1G,HCST,SH2D1A,PRKDC                                                                                                                                                                                                                                                                       |

---







**Supplementary Table 6. List of DEGs in cluster 0 and cluster 1, related to *Cytoskeletal rearrangement, cell motility and cell-cell interactions*.**

| <b>Geni</b> | <b>log2FC cluster 0 vs cluster 1</b> | <b>adj p value</b> |
|-------------|--------------------------------------|--------------------|
| CCL5        | -3,32                                | 2,78E-32           |
| IFNG        | -2,78                                | 2,56E-26           |
| GNLY        | -2,62                                | 4,81E-28           |
| CD3D        | -2,54                                | 1,47E-35           |
| CD69        | -2,51                                | 2,09E-27           |
| CD3E        | -2,37                                | 4,89E-37           |
| IL7R        | -2,34                                | 8,55E-36           |
| XCL1        | -2,28                                | 1,14E-36           |
| CD3G        | -2,16                                | 1,63E-38           |
| CD2         | -2,16                                | 4,70E-31           |
| IL2         | -2,07                                | 1,69E-27           |
| LCK         | -2,05                                | 1,60E-35           |
| CD8A        | -2,01                                | 1,76E-34           |
| ETS1        | -1,97                                | 4,04E-35           |
| PIK3R1      | -1,94                                | 8,34E-20           |
| HLA-DRB5    | -1,87                                | 8,55E-06           |
| BCL11B      | -1,78                                | 3,27E-36           |
| LAT         | -1,77                                | 5,24E-35           |
| PTGDR       | -1,71                                | 1,47E-34           |
| CD40LG      | -1,69                                | 1,19E-32           |
| GATA3       | -1,68                                | 8,34E-30           |
| ITK         | -1,63                                | 5,79E-35           |
| KLRG1       | -1,61                                | 8,55E-20           |
| PDCD1       | -1,60                                | 6,01E-31           |
| BATF        | -1,59                                | 2,73E-35           |
| STAT4       | -1,57                                | 1,45E-27           |
| FYN         | -1,57                                | 1,16E-31           |
| SIRPG       | -1,56                                | 5,36E-33           |
| ITGA1       | -1,55                                | 4,45E-27           |
| PRDM1       | -1,53                                | 2,43E-22           |
| F2R         | -1,52                                | 9,14E-21           |
| SH2D1A      | -1,52                                | 5,32E-28           |
| ADGRE5      | -1,52                                | 4,88E-20           |
| STK4        | -1,50                                | 1,55E-23           |
| ZAP70       | -1,49                                | 3,16E-34           |
| C1GALT1     | -1,48                                | 1,13E-24           |
| SLFN12L     | -1,46                                | 1,14E-30           |
| ITGA4       | -1,46                                | 3,21E-22           |
| PIKFYVE     | -1,44                                | 6,66E-18           |
| RICTOR      | -1,44                                | 1,74E-10           |
| CXCR4       | -1,43                                | 1,32E-15           |
| SMPD1       | -1,42                                | 9,71E-25           |
| PTPRC       | -1,42                                | 5,40E-21           |
| MIA3        | -1,40                                | 2,89E-14           |
| LTB         | -1,39                                | 2,79E-20           |
| CD247       | -1,39                                | 6,29E-29           |
| ORMDL3      | -1,37                                | 5,19E-13           |
| P2RY8       | -1,36                                | 1,84E-25           |
| RUNX3       | -1,36                                | 1,27E-18           |
| MPRIP       | -1,36                                | 1,65E-04           |
| PARP1       | -1,35                                | 7,22E-20           |
| CBFB        | -1,33                                | 2,25E-16           |
| CYFIP2      | -1,33                                | 2,65E-29           |
| CASP3       | -1,32                                | 6,63E-13           |
| PIK3R4      | -1,32                                | 8,10E-27           |
| PPP2R5C     | -1,32                                | 2,71E-27           |
| ICOS        | -1,31                                | 7,35E-20           |
| PXN         | -1,31                                | 1,49E-21           |
| SKAP1       | -1,31                                | 5,92E-28           |

|         |       |          |
|---------|-------|----------|
| PPP2R5E | -1,30 | 1,37E-13 |
| RHOT1   | -1,30 | 3,80E-15 |
| BCL2    | -1,29 | 2,09E-13 |
| DAXX    | -1,29 | 8,64E-15 |
| PTPN22  | -1,26 | 1,51E-14 |
| ARHGEF6 | -1,25 | 2,35E-20 |
| CD47    | -1,24 | 1,54E-18 |
| PIP4K2A | -1,23 | 1,13E-09 |
| RASGRP1 | -1,21 | 3,93E-17 |
| MATK    | -1,21 | 1,09E-17 |
| CBLB    | -1,20 | 1,38E-15 |
| CCND2   | -1,19 | 1,37E-14 |
| S1PR1   | -1,19 | 2,19E-18 |
| FLT3LG  | -1,18 | 3,37E-18 |
| CD58    | -1,17 | 1,13E-09 |
| HLA-F   | -1,17 | 1,86E-19 |
| BRAF    | -1,17 | 4,07E-14 |
| MMP7    | -1,15 | 1,96E-03 |
| BAD     | -1,14 | 8,78E-19 |
| TNFSF14 | -1,14 | 1,82E-09 |
| MAP2K7  | -1,13 | 2,86E-14 |
| F11R    | -1,13 | 6,42E-09 |
| PLA2G6  | -1,12 | 2,15E-16 |
| GYPC    | -1,12 | 9,89E-10 |
| CREB3   | -1,12 | 2,26E-15 |
| IL18R1  | -1,12 | 2,63E-09 |
| SLAMF1  | -1,11 | 3,41E-15 |
| CD5     | -1,11 | 3,35E-19 |
| PTGER4  | -1,10 | 3,72E-14 |
| ITGAL   | -1,09 | 7,64E-08 |
| CYTIP   | -1,08 | 4,76E-21 |
| STAT5B  | -1,07 | 3,40E-14 |
| PRKCQ   | -1,06 | 5,91E-19 |
| KRAS    | -1,05 | 4,99E-05 |
| FBNP1   | -1,05 | 1,22E-10 |
| IKBKB   | -1,04 | 2,05E-18 |
| FAS     | -1,04 | 6,74E-11 |
| PPP2R5D | -1,03 | 2,53E-11 |
| CREBBP  | -1,02 | 5,93E-08 |
| FUT8    | -1,02 | 2,15E-09 |
| MGAT5   | -1,01 | 1,44E-13 |
| SOCS1   | -1,00 | 1,78E-15 |
| PIK3C2B | -1,00 | 1,53E-11 |
| RASD1   | -0,99 | 1,78E-11 |
| OGT     | -0,99 | 2,32E-11 |
| JAK1    | -0,99 | 3,30E-09 |
| CAPN2   | -0,99 | 3,67E-08 |
| NRAS    | -0,99 | 4,73E-12 |
| NCK1    | -0,99 | 9,54E-10 |
| S1PR4   | -0,99 | 4,52E-15 |
| PLCB3   | -0,98 | 4,63E-10 |
| CD44    | -0,98 | 5,67E-12 |
| HMGB1   | -0,97 | 2,10E-16 |
| CCND3   | -0,96 | 6,26E-18 |
| PRKCH   | -0,96 | 4,18E-07 |
| DIAPH2  | -0,96 | 1,96E-09 |
| CREB1   | -0,96 | 1,04E-13 |
| LAG3    | -0,95 | 3,40E-15 |
| MYH9    | -0,94 | 6,84E-16 |
| EVL     | -0,94 | 7,43E-22 |
| TSPAN14 | -0,94 | 3,75E-16 |

|           |       |          |
|-----------|-------|----------|
| PRKAR2A   | -0,94 | 1,46E-07 |
| PDE4B     | -0,94 | 3,93E-06 |
| HEBP1     | -0,93 | 4,16E-06 |
| DOCK11    | -0,93 | 3,80E-05 |
| YWHAQ     | -0,93 | 4,53E-21 |
| CASP8     | -0,93 | 2,67E-07 |
| AKIRIN1   | -0,92 | 1,77E-10 |
| PRKACB    | -0,92 | 4,18E-09 |
| EZR       | -0,91 | 7,27E-17 |
| PREX1     | -0,91 | 1,22E-19 |
| WIPF1     | -0,91 | 3,41E-18 |
| TNFRSF18  | -0,90 | 3,66E-09 |
| SEMA4D    | -0,90 | 1,99E-12 |
| PLEKHA2   | -0,90 | 5,95E-09 |
| PPP2R2B   | -0,90 | 6,01E-11 |
| FGD3      | -0,89 | 2,73E-04 |
| MAPK13    | -0,88 | 5,00E-10 |
| ACTN4     | -0,88 | 2,46E-15 |
| ANGPT2    | -0,88 | 1,67E-06 |
| AQP3      | -0,88 | 5,92E-13 |
| CD6       | -0,87 | 7,31E-09 |
| GPR132    | -0,87 | 8,86E-04 |
| CLTC      | -0,87 | 6,44E-04 |
| ANO6      | -0,87 | 3,90E-05 |
| RAC2      | -0,86 | 2,16E-17 |
| GSK3B     | -0,85 | 7,23E-04 |
| MAP3K14   | -0,85 | 1,19E-06 |
| ARPC5L    | -0,84 | 2,64E-10 |
| RPS6KA5   | -0,84 | 5,28E-12 |
| STIM2     | -0,84 | 2,13E-07 |
| IQGAP1    | -0,84 | 2,80E-10 |
| LY96      | 0,85  | 3,11E-12 |
| TNFAIP8L2 | 0,87  | 1,12E-05 |
| RASGRP4   | 0,92  | 4,90E-03 |
| CARD9     | 0,97  | 5,19E-04 |
| AIF1      | 1,00  | 3,18E-11 |
| SIGLEC7   | 1,00  | 1,52E-03 |
| MS4A4A    | 1,07  | 1,08E-03 |
| PPIF      | 1,09  | 5,38E-03 |
| NCF2      | 1,19  | 4,28E-05 |
| RAB34     | 1,28  | 3,32E-08 |
| FCER1G    | 1,46  | 1,29E-15 |
| PLAU      | 1,71  | 3,58E-03 |

---

**Supplementary Table 7. List of DEGs in cluster 0 and cluster 1, related to *Activation state* .**

| <b>Geni</b> | <b>lnFC cluster 0 vs 1</b> | <b>adj p value</b> |
|-------------|----------------------------|--------------------|
| KLRB1       | -2,31                      | 1,36E-33           |
| CCL5        | -2,31                      | 2,78E-32           |
| IL32        | -2,12                      | 1,52E-35           |
| IFNG        | -1,93                      | 2,56E-26           |
| GZMA        | -1,91                      | 9,39E-37           |
| GNLY        | -1,82                      | 4,81E-28           |
| KLRC1       | -1,78                      | 1,66E-30           |
| CD3D        | -1,76                      | 1,47E-35           |
| CD69        | -1,74                      | 2,09E-27           |
| CD3E        | -1,64                      | 4,89E-37           |
| IL7R        | -1,63                      | 8,55E-36           |
| XCL1        | -1,58                      | 1,14E-36           |
| CD52        | -1,52                      | 6,31E-28           |
| TIGIT       | -1,51                      | 6,15E-35           |
| CD3G        | -1,50                      | 1,63E-38           |
| CD2         | -1,50                      | 4,70E-31           |
| IL2         | -1,44                      | 1,69E-27           |
| CD27        | -1,43                      | 2,23E-36           |
| RORA        | -1,42                      | 6,85E-37           |
| LCK         | -1,42                      | 1,60E-35           |
| CD8A        | -1,40                      | 1,76E-34           |
| KLRD1       | -1,37                      | 3,21E-28           |
| ETS1        | -1,37                      | 4,04E-35           |
| TOB1        | -1,36                      | 4,29E-29           |
| DUSP4       | -1,36                      | 7,21E-18           |
| PIK3R1      | -1,35                      | 8,34E-20           |
| CLEC2D      | -1,33                      | 1,23E-32           |
| CD7         | -1,32                      | 2,83E-26           |
| HLA-DRB5    | -1,30                      | 8,55E-06           |
| IKZF3       | -1,24                      | 8,21E-28           |
| BCL11B      | -1,23                      | 3,27E-36           |
| GPR174      | -1,23                      | 1,01E-30           |
| LAT         | -1,23                      | 5,24E-35           |
| EML4        | -1,19                      | 3,28E-27           |
| PTGDR       | -1,19                      | 1,47E-34           |
| PDE4D       | -1,18                      | 2,36E-34           |
| CD40LG      | -1,17                      | 1,19E-32           |
| CAMK4       | -1,16                      | 1,41E-37           |
| GATA3       | -1,16                      | 8,34E-30           |
| PARP8       | -1,16                      | 4,20E-26           |
| PIK3IP1     | -1,15                      | 5,17E-21           |
| PRF1        | -1,15                      | 5,70E-36           |
| RBL2        | -1,14                      | 9,00E-30           |

|          |       |          |
|----------|-------|----------|
| SIT1     | -1,14 | 3,86E-34 |
| ITK      | -1,13 | 5,79E-35 |
| PDCD1    | -1,11 | 6,01E-31 |
| BATF     | -1,11 | 2,73E-35 |
| STAT4    | -1,09 | 1,45E-27 |
| GLMN     | -1,09 | 6,22E-24 |
| THEMIS   | -1,09 | 6,78E-35 |
| FYN      | -1,09 | 1,16E-31 |
| PTPN4    | -1,09 | 3,66E-30 |
| SH2D2A   | -1,08 | 2,19E-35 |
| SIRPG    | -1,08 | 5,36E-33 |
| ITGA1    | -1,08 | 4,45E-27 |
| PDE7A    | -1,07 | 8,73E-28 |
| PTPN7    | -1,07 | 4,36E-23 |
| PRDM1    | -1,06 | 2,43E-22 |
| TBP      | -1,06 | 1,89E-26 |
| IP6K1    | -1,06 | 1,94E-26 |
| F2R      | -1,06 | 9,14E-21 |
| SH2D1A   | -1,06 | 5,32E-28 |
| CTCF     | -1,05 | 2,94E-14 |
| STK4     | -1,04 | 1,55E-23 |
| BCLAF1   | -1,04 | 7,24E-19 |
| PPP1R10  | -1,04 | 4,06E-14 |
| ZAP70    | -1,04 | 3,16E-34 |
| RAB27A   | -1,01 | 2,64E-25 |
| ITGA4    | -1,01 | 3,21E-22 |
| PDCD4    | -1,01 | 7,50E-22 |
| TBC1D10C | -1,01 | 7,11E-27 |
| STYX     | -1,01 | 8,77E-16 |
| MYBL1    | -1,00 | 8,10E-14 |
| PIKFYVE  | -1,00 | 6,66E-18 |
| RICTOR   | -1,00 | 1,74E-10 |
| SLAMF6   | -0,99 | 1,38E-20 |
| CXCR4    | -0,99 | 1,32E-15 |
| CDKN2A   | -0,99 | 2,28E-27 |
| SMPD1    | -0,99 | 9,71E-25 |
| PTPRC    | -0,98 | 5,40E-21 |
| TMC6     | -0,98 | 1,86E-22 |
| ERN1     | -0,97 | 1,46E-16 |
| AKAP11   | -0,97 | 4,23E-20 |
| CABIN1   | -0,97 | 9,25E-21 |
| MAF      | -0,97 | 4,30E-17 |
| SLA2     | -0,97 | 1,61E-26 |
| LTB      | -0,96 | 2,79E-20 |
| CD247    | -0,96 | 6,29E-29 |

|         |       |          |
|---------|-------|----------|
| BTG1    | -0,96 | 3,35E-21 |
| SNTB1   | -0,96 | 5,23E-32 |
| KAT7    | -0,96 | 6,85E-15 |
| TSC22D3 | -0,95 | 1,41E-13 |
| RUNX3   | -0,94 | 1,27E-18 |
| MPRIP   | -0,94 | 1,65E-04 |
| TAB2    | -0,94 | 3,70E-16 |
| NMNAT1  | -0,94 | 9,41E-27 |
| PARP1   | -0,94 | 7,22E-20 |
| MS4A1   | -0,93 | 8,97E-18 |
| RCAN3   | -0,93 | 1,44E-16 |
| CBFB    | -0,92 | 2,25E-16 |
| CASP3   | -0,92 | 6,63E-13 |
| PIK3R4  | -0,92 | 8,10E-27 |
| PPP2R5C | -0,91 | 2,71E-27 |
| EIF4G1  | -0,91 | 5,26E-11 |
| PXN     | -0,91 | 1,49E-21 |
| TRAF1   | -0,91 | 3,73E-13 |
| SKAP1   | -0,91 | 5,92E-28 |
| ISG20   | -0,91 | 3,80E-15 |
| PPP2R5E | -0,90 | 1,37E-13 |
| RHOT1   | -0,90 | 3,80E-15 |
| BCL2    | -0,90 | 2,09E-13 |
| PNPLA2  | -0,90 | 3,65E-10 |
| DAXX    | -0,89 | 8,64E-15 |
| SIRT3   | -0,89 | 1,09E-21 |
| SMAD2   | -0,88 | 8,14E-17 |
| BACE1   | -0,88 | 3,27E-29 |
| LY9     | -0,88 | 2,08E-20 |
| PTPN22  | -0,88 | 1,51E-14 |
| IL2RB   | -0,87 | 1,78E-32 |
| HECTD1  | -0,87 | 2,26E-18 |
| ARHGEF6 | -0,87 | 2,35E-20 |
| ITPKB   | -0,86 | 5,56E-19 |
| LAX1    | -0,86 | 3,29E-18 |
| KPNA1   | -0,86 | 2,56E-12 |
| CD47    | -0,86 | 1,54E-18 |
| TXNIP   | -0,86 | 4,28E-10 |
| SLC36A4 | -0,85 | 5,63E-10 |
| PIP4K2A | -0,85 | 1,13E-09 |
| SACM1L  | -0,84 | 4,61E-18 |
| RASGRP1 | -0,84 | 3,93E-17 |
| PRUNE1  | -0,84 | 2,74E-13 |
| MARK2   | -0,84 | 2,44E-16 |
| CBLB    | -0,84 | 1,38E-15 |

|         |       |          |
|---------|-------|----------|
| PIAS1   | -0,83 | 5,70E-16 |
| KPNA4   | -0,83 | 1,96E-11 |
| CCND2   | -0,83 | 1,37E-14 |
| S1PR1   | -0,82 | 2,19E-18 |
| CAMK2G  | -0,82 | 5,18E-13 |
| DNAJC17 | -0,82 | 2,21E-11 |
| FLT3LG  | -0,82 | 3,37E-18 |
| ATM     | -0,82 | 3,35E-15 |
| ZEB1    | -0,82 | 3,79E-11 |
| CD58    | -0,82 | 1,13E-09 |
| NMT2    | -0,82 | 3,64E-12 |
| HLA-F   | -0,81 | 1,86E-19 |
| BRAF    | -0,81 | 4,07E-14 |
| POLR2I  | -0,81 | 8,58E-20 |
| PIM1    | -0,81 | 9,37E-10 |
| RAB5B   | -0,81 | 1,03E-13 |
| PYGL    | -0,81 | 3,65E-12 |
| VAMP4   | -0,80 | 2,63E-08 |
| CD82    | -0,80 | 1,62E-09 |
| HSPH1   | -0,80 | 2,85E-04 |
| POLM    | -0,80 | 3,07E-17 |
| MMP7    | -0,80 | 1,96E-03 |
| TCF7    | -0,80 | 3,18E-09 |
| RANBP2  | -0,79 | 2,78E-09 |
| ATG5    | -0,79 | 2,12E-12 |
| MT2A    | -0,79 | 1,34E-08 |
| BAD     | -0,79 | 8,78E-19 |
| TNFSF14 | -0,79 | 1,82E-09 |
| NCOA3   | -0,79 | 1,17E-12 |
| MAP2K7  | -0,79 | 2,86E-14 |
| DNAJA3  | -0,79 | 7,81E-17 |
| WNK1    | -0,78 | 9,00E-19 |
| DNAJC3  | -0,78 | 8,98E-14 |
| PLA2G6  | -0,78 | 2,15E-16 |
| CREB3   | -0,78 | 2,26E-15 |
| IL18R1  | -0,78 | 2,63E-09 |
| NCOR2   | -0,77 | 1,04E-11 |
| SLAMF1  | -0,77 | 3,41E-15 |
| CD5     | -0,77 | 3,35E-19 |
| IL2RG   | -0,77 | 3,84E-11 |
| PTGER4  | -0,76 | 3,72E-14 |
| ADAT2   | -0,76 | 2,39E-10 |
| GADD45G | -0,76 | 7,20E-12 |
| GBA     | -0,76 | 2,93E-12 |
| ITGAL   | -0,76 | 7,64E-08 |



|         |       |          |
|---------|-------|----------|
| AKAP13  | -0,76 | 2,10E-15 |
| CYTIP   | -0,75 | 4,76E-21 |
| DNAJB12 | -0,75 | 3,53E-15 |
| STAT5B  | -0,75 | 3,40E-14 |
| PML     | -0,74 | 7,99E-11 |
| FOXP1   | -0,74 | 1,13E-21 |
| PRKCQ   | -0,74 | 5,91E-19 |
| CYLD    | -0,74 | 2,05E-20 |
| PTGER2  | -0,73 | 7,52E-08 |
| ELF1    | -0,73 | 6,23E-11 |
| KRAS    | -0,73 | 4,99E-05 |
| PPP2R3C | -0,73 | 1,63E-11 |
| FNBP1   | -0,73 | 1,22E-10 |
| CREM    | -0,73 | 1,99E-05 |
| IKBKB   | -0,73 | 2,05E-18 |
| RPA2    | -0,72 | 1,61E-09 |
| JUNB    | -0,72 | 2,81E-09 |
| FAS     | -0,72 | 6,74E-11 |
| PPP2R5D | -0,72 | 2,53E-11 |
| AKAP9   | -0,72 | 1,19E-16 |
| CREBBP  | -0,71 | 5,93E-08 |
| DNAJA1  | -0,71 | 2,19E-15 |
| DNAJB1  | -0,71 | 2,64E-06 |
| AKAP7   | -0,71 | 1,56E-10 |
| MGAT5   | -0,70 | 1,44E-13 |
| SKIL    | -0,70 | 7,92E-09 |
| TNKS2   | -0,70 | 1,17E-13 |
| SOCS1   | -0,70 | 1,78E-15 |
| PIK3C2B | -0,70 | 1,53E-11 |
| GPI     | -0,70 | 1,42E-16 |
| MALT1   | -0,70 | 1,05E-07 |
| RASD1   | -0,69 | 1,78E-11 |
| IRF1    | -0,69 | 8,45E-19 |
| JAK1    | -0,69 | 3,30E-09 |
| PPP3CA  | -0,69 | 5,69E-07 |
| NRAS    | -0,69 | 4,73E-12 |
| NCK1    | -0,69 | 9,54E-10 |
| RAB6A   | -0,69 | 5,48E-15 |
| S1PR4   | -0,69 | 4,52E-15 |
| MTMR6   | -0,68 | 1,35E-08 |
| PLCB3   | -0,68 | 4,63E-10 |
| KLF9    | -0,68 | 1,61E-05 |
| CD44    | -0,68 | 5,67E-12 |
| RC3H2   | -0,68 | 1,88E-08 |
| HMGB1   | -0,68 | 2,10E-16 |

|          |       |          |
|----------|-------|----------|
| RAB8B    | -0,68 | 5,56E-08 |
| DNAJB14  | -0,67 | 6,21E-09 |
| NABP1    | -0,67 | 7,70E-09 |
| PHKG2    | -0,67 | 7,83E-05 |
| CSNK1G3  | -0,67 | 6,78E-03 |
| CCND3    | -0,67 | 6,26E-18 |
| RAB29    | -0,67 | 2,29E-06 |
| PRKCH    | -0,67 | 4,18E-07 |
| CREB1    | -0,66 | 1,04E-13 |
| UBASH3A  | -0,66 | 6,56E-14 |
| KMT2E    | -0,66 | 1,36E-09 |
| RGS2     | -0,66 | 8,71E-05 |
| LAG3     | -0,66 | 3,40E-15 |
| PRKAR2A  | -0,65 | 1,46E-07 |
| DNAJA4   | -0,65 | 7,04E-05 |
| PDE4B    | -0,65 | 3,93E-06 |
| HEBP1    | -0,65 | 4,16E-06 |
| ARCN1    | -0,65 | 1,13E-07 |
| YWHAQ    | -0,65 | 4,53E-21 |
| ADD3     | -0,64 | 4,28E-17 |
| CASP8    | -0,64 | 2,67E-07 |
| PRR5     | -0,64 | 1,41E-12 |
| PPARD    | -0,64 | 1,53E-07 |
| PRKACB   | -0,64 | 4,18E-09 |
| IRF2     | -0,64 | 7,12E-07 |
| JUND     | -0,64 | 3,15E-18 |
| ZNF335   | -0,63 | 1,12E-15 |
| EZR      | -0,63 | 7,27E-17 |
| PREX1    | -0,63 | 1,22E-19 |
| DEF6     | -0,63 | 1,60E-13 |
| GRAP2    | -0,63 | 6,47E-12 |
| WIPF1    | -0,63 | 3,41E-18 |
| NCSTN    | -0,63 | 1,15E-07 |
| TNFRSF18 | -0,63 | 3,66E-09 |
| SEMA4D   | -0,63 | 1,99E-12 |
| PPP2R2B  | -0,62 | 6,01E-11 |
| ISG15    | -0,62 | 2,86E-06 |
| PPP1R16B | -0,62 | 1,06E-09 |
| EP300    | -0,62 | 3,41E-05 |
| PGAP3    | -0,62 | 2,95E-07 |
| MAPK13   | -0,61 | 5,00E-10 |
| PARP4    | -0,61 | 8,42E-06 |
| ANGPT2   | -0,61 | 1,67E-06 |
| CD6      | -0,61 | 7,31E-09 |
| IKZF1    | -0,61 | 7,53E-12 |

|           |       |          |
|-----------|-------|----------|
| EIF2AK2   | -0,61 | 8,36E-08 |
| GIMAP1    | -0,60 | 1,64E-06 |
| GPR132    | -0,60 | 8,86E-04 |
| EIF3A     | -0,60 | 2,96E-11 |
| ACLY      | -0,60 | 2,90E-03 |
| TOX       | -0,60 | 1,80E-08 |
| ANO6      | -0,60 | 3,90E-05 |
| KPNA6     | -0,60 | 3,67E-09 |
| EIF4G3    | -0,60 | 1,05E-08 |
| LBR       | -0,60 | 1,74E-08 |
| EIF4A2    | -0,60 | 2,55E-14 |
| RAC2      | -0,60 | 2,16E-17 |
| KIDINS220 | -0,59 | 4,81E-07 |
| GSK3B     | -0,59 | 7,23E-04 |
| MAP3K14   | -0,59 | 1,19E-06 |
| EIF3B     | -0,59 | 1,88E-08 |
| DNAJB6    | -0,59 | 1,82E-07 |
| NR4A2     | -0,59 | 2,17E-03 |
| PPP4R1    | -0,58 | 4,67E-07 |
| NABP2     | -0,58 | 3,27E-09 |
| HSPA8     | -0,58 | 4,87E-11 |
| RPS6KA5   | -0,58 | 5,28E-12 |
| STIM2     | -0,58 | 2,13E-07 |
| LY96      | 0,59  | 3,11E-12 |
| TNFAIP8L2 | 0,61  | 1,12E-05 |
| CARD9     | 0,68  | 5,19E-04 |
| AIF1      | 0,69  | 3,18E-11 |
| MS4A4A    | 0,74  | 1,08E-03 |
| POLR2H    | 0,81  | 4,84E-07 |
| NCF2      | 0,83  | 4,28E-05 |
| RAB34     | 0,89  | 3,32E-08 |
| MGST1     | 0,89  | 1,62E-09 |
| FTL       | 0,92  | 8,00E-08 |
| PIK3AP1   | 0,95  | 1,70E-07 |
| FCER1G    | 1,02  | 1,29E-15 |
| PLAU      | 1,19  | 3,58E-03 |

---

Supplementary Table 8. List of Diseases and Functions deregulated in cluster 2 compared with cluster 0.

| Diseases or Functions Annotation        | p-Value  | Activation z-score | Molecules                                                                                                                                                                                                                                                                                                                                                                                                                                             |
|-----------------------------------------|----------|--------------------|-------------------------------------------------------------------------------------------------------------------------------------------------------------------------------------------------------------------------------------------------------------------------------------------------------------------------------------------------------------------------------------------------------------------------------------------------------|
| Organismal death                        | 1,75E-03 | -3,16              | VIM,MYL6,HDAC2,CFL1,PTEN,ACTG1,GNB1,ATP5MF,DDX5,KRR1                                                                                                                                                                                                                                                                                                                                                                                                  |
| Leukocyte migration                     | 1,59E-02 | -2,38              | FASTK,GAS6,CORO1A,HSPA1A/HSPA1B,PTEN,ALOX5AP,RASGRP4,CD48,FCER1G,DEPTOR,NFKBIA,PRDX1,MAPKAPK2,MYH9,CD63,CXCR4,TPT1,S100A10,LRP1,TGFBR1,LAMTOR2,PILRA,SMPD2,JAK2,CD14,NINJ1,EZR,PTPN1,TIMP2,GNB2,EIF2AK4,IL4R,STK4,CTS2,JUN,SERPINB1,HCLS1,CLEC4E,LGALS1,SOCS3,CSF2RA,G6PC3,LITAF,FCER1A,MTND1,MYO1G,BSG,LY96,GNAI2,GPSM3,CD302,PFN1,CD1D,CD37,ROCK1,UCP2,MPP1,S100A8,GLRX,VASP,CD99,S100A9,FYB1,GNAS,RGS1,UBE2I,CAST,PTPRC,DDT,RAC1                   |
| Cell movement of leukocytes             | 1,98E-02 | -2,29              | CORO1A,PTEN,RASGRP4,CD48,FCER1G,DEPTOR,PRDX1,MAPKAPK2,MYH9,CD63,CXCR4,S100A10,LRP1,TGFBR1,PILRA,SMPD2,JAK2,CD14,NINJ1,EZR,PTPN1,TIMP2,GNB2,IL4R,STK4,CTS2,JUN,SERPINB1,HCLS1,LGALS1,SOCS3,CSF2RA,G6PC3,LITAF,FCER1A,MTND1,MYO1G,BSG,LY96,GNAI2,GPSM3,CD302,PFN1,CD1D,CD37,ROCK1,MPP1,S100A8,VASP,CD99,S100A9,FYB1,GNAS,RGS1,UBE2I,CAST,DDT,RAC1                                                                                                       |
| Cell movement                           | 1,20E-02 | -2,23              | GAS6,FASTK,CORO1A,HSPA1A/HSPA1B,PTEN,ALOX5AP,RASGRP4,CD48,FCER1G,DEPTOR,NFKBIA,PRDX1,MAPKAPK2,MYH9,CD63,CXCR4,TPT1,S100A10,LRP1,TGFBR1,LAMTOR2,PILRA,SMPD2,JAK2,CD14,NINJ1,EZR,PTPN1,TIMP2,GNB2,EIF2AK4,IL4R,BAX,STK4,CTS2,JUN,SERPINB1,HCLS1,CLEC4E,LGALS1,SOCS3,CSF2RA,G6PC3,LITAF,FCER1A,MTND1,MYO1G,BSG,LY96,GNAI2,GPSM3,CD302,PFN1,CD1D,CD37,ROCK1,UCP2,MPP1,S100A8,GLRX,VASP,CD99,S100A9,FYB1,GNAS,RGS1,UBE2I,CAST,PTPRC,DDT,RAC1               |
| Binding of leukocytes                   | 8,54E-03 | -1,91              | GAS6,CORO1A,LGALS1,FCGR1A,TNFSF12,CD48,DEPTOR,PKM,MYO1G,GNAI2,CXCR4,CD37,ROCK1,PRDX2,TGFBR1,PILRA,IL18R1,ADAM9,S100A8,MFNG,GLRX,JAK2,CD14,VASP,NINJ1,S100A9,EZR,FYB1,CALR,RGS1,UBE2I,PTPRC,RAC1,STK4                                                                                                                                                                                                                                                  |
| Adhesion of immune cells                | 1,20E-02 | -1,88              | GAS6,CORO1A,FCGR1A,LGALS1,TNFSF12,CD48,PKM,DEPTOR,MYO1G,GNAI2,CXCR4,CD37,ROCK1,TGFBR1,PRDX2,PILRA,ADAM9,S100A8,GLRX,JAK2,CD14,NINJ1,S100A9,EZR,FYB1,CALR,RGS1,UBE2I,PTPRC,RAC1,STK4                                                                                                                                                                                                                                                                   |
| Renal cancer                            | 7,96E-03 | -1,63              | LILRB4,HCLS1,DHRS7,GNB1,ATP5MF,DDX5                                                                                                                                                                                                                                                                                                                                                                                                                   |
| Extracranial solid tumor                | 3,56E-02 | -1,63              | LILRB4,HCLS1,PAG1,DHRS7,GNB1,ATP5MF,PTPRC,DDX5                                                                                                                                                                                                                                                                                                                                                                                                        |
| Concentration of lipid                  | 3,82E-02 | -1,09              | S100A8,G6PC3,S100A9,CS,ACAT1,ROCK1,IL4R,PKM                                                                                                                                                                                                                                                                                                                                                                                                           |
| Interaction of mononuclear leukocytes   | 3,34E-02 | -0,85              | MFNG,JAK2,CD14,VASP,EZR,CD48,FYB1,DEPTOR,MYO1G,CALR,GNAI2,CXCR4,RGS1,UBE2I,PRDX2,RAC1,STK4,IL18R1                                                                                                                                                                                                                                                                                                                                                     |
| Binding of lymphocytes                  | 1,29E-02 | -0,78              | MFNG,JAK2,VASP,CD48,EZR,FYB1,DEPTOR,MYO1G,CALR,GNAI2,CXCR4,RGS1,UBE2I,RAC1,STK4,IL18R1                                                                                                                                                                                                                                                                                                                                                                |
| Activation of leukocytes                | 3,81E-02 | -0,70              | CORO1A,HSPA1A/HSPA1B,HPS1,PTEN,CD300LF,FCGR1A,CD48,FCER1G,NFKBIA,PRDX1,LILRB4,SLC33A1,TPT1,LRP1,IL18R1,ADAM9,PAG1,TXNIP,CD14,LAPTMS,MGST1,RAB8B,HAVCR2,CALR,EIF2AK4,IFI35,IL4R,BCLAF1,CD163,BAX,PSMB9,PSMB8,MT-CYB,RAB33A,LGALS1,TNFSF12,FKBP1A,PSME2,IRAK3,LY96,DUSP1,CD1D,CD37,CD1E,UPF2,HDAC9,S100A8,NFKB1,MFNG,VAMP8,MBP,OSTM1,DUSP22,CRY1,PHB2,PTPRC                                                                                             |
| Binding of mononuclear leukocytes       | 3,13E-02 | -0,63              | MFNG,JAK2,VASP,CD48,EZR,FYB1,DEPTOR,MYO1G,CALR,GNAI2,CXCR4,RGS1,UBE2I,PRDX2,RAC1,STK4,IL18R1                                                                                                                                                                                                                                                                                                                                                          |
| Activation of mononuclear leukocytes    | 2,71E-02 | -0,63              | CORO1A,HSPA1A/HSPA1B,HPS1,PTEN,LGALS1,TNFSF12,CD48,FKBP1A,FCER1G,NFKBIA,PRDX1,IRAK3,LILRB4,LY96,SLC33A1,DUSP1,TPT1,CD1D,CD1E,HDAC9,IL18R1,ADAM9,PAG1,NFKB1,VAMP8,MFNG,TXNIP,MBP,CD14,LAPTMS,MGST1,HAVCR2,DUSP22,CRY1,CALR,EIF2AK4,PHB2,BCLAF1,IL4R,PTPRC,CD163,BAX                                                                                                                                                                                    |
| Proliferation of immune cells           | 2,15E-02 | -0,61              | CORO1A,ITPR2,HSPA1A/HSPA1B,FTL,PTEN,CD48,FCER1G,GADD45B,RABL3,NFKBIA,LILRB4,CXCR4,TPT1,RGS2,TGFBR1,LAMTOR2,ZNHIT1,CD300C,RELT,ELOB,PAG1,TXNIP,JAK2,CD14,LAPTMS,EZR,HAVCR2,IL4R,BCLAF1,ELAVL1,ELAVL1,TALD01,STK17B,SLC39A10,POU2F2,STK4,PMAIP1,CTS2,JUNB,HCLS1,MARCHF7,LGALS1,SOCS3,FKBP1A,RNF7,BSG,VIM,LY96,GNAI2,TSC22D3,DUSP1,CD1D,ISG15,CD37,ARHGDI1,PRDX2,NFKB1,MFNG,MBP,FYB1,LAMTOR1,DUSP22,NDUFB10,RHOG,GNAS,VSIG4,GAPT,PTPRC                   |
| Proliferation of mononuclear leukocytes | 4,08E-02 | -0,50              | CORO1A,ITPR2,HSPA1A/HSPA1B,FTL,PTEN,CD48,FCER1G,GADD45B,RABL3,NFKBIA,LILRB4,CXCR4,TPT1,RGS2,TGFBR1,ZNHIT1,CD300C,RELT,ELOB,PAG1,TXNIP,CD14,LAPTMS,EZR,HAVCR2,CALR,EIF2AK4,IL4R,BCLAF1,ELAVL1,ELAVL1,STK17B,SLC39A10,POU2F2,STK4,PMAIP1,CTS2,JUNB,HCLS1,MARCHF7,LGALS1,SOCS3,FKBP1A,RNF7,BSG,VIM,LY96,GNAI2,TSC22D3,DUSP1,CD1D,ISG15,CD37,ARHGDI1,PRDX2,NFKB1,MFNG,MBP,FYB1,LAMTOR1,DUSP22,NDUFB10,RHOG,GNAS,VSIG4,GAPT,PTPRC                          |
| Proliferation of lymphatic system cells | 3,35E-02 | -0,40              | CORO1A,ITPR2,HSPA1A/HSPA1B,FTL,PTEN,CD48,FCER1G,GADD45B,RABL3,NFKBIA,LILRB4,CXCR4,TPT1,RGS2,TGFBR1,ZNHIT1,CD300C,RELT,ELOB,PAG1,TXNIP,JAK2,CD14,LAPTMS,EZR,HAVCR2,CALR,EIF2AK4,IL4R,BCLAF1,ELAVL1,ELAVL1,STK17B,SLC39A10,POU2F2,STK4,PMAIP1,CTS2,JUNB,HCLS1,MARCHF7,LGALS1,SOCS3,FKBP1A,RNF7,BSG,VIM,LY96,GNAI2,TSC22D3,DUSP1,CD1D,ISG15,CD37,ARHGDI1,PRDX2,NFKB1,MFNG,MBP,FYB1,LAMTOR1,DUSP22,NDUFB10,RHOG,GNAS,VSIG4,GAPT,PTPRC                     |
| Proliferation of lymphocytes            | 4,20E-02 | -0,40              | CORO1A,ITPR2,HSPA1A/HSPA1B,FTL,PTEN,CD48,FCER1G,GADD45B,RABL3,NFKBIA,LILRB4,CXCR4,TPT1,RGS2,TGFBR1,ZNHIT1,CD300C,RELT,ELOB,PAG1,TXNIP,CD14,LAPTMS,EZR,HAVCR2,CALR,EIF2AK4,IL4R,BCLAF1,ELAVL1,ELAVL1,STK17B,SLC39A10,POU2F2,STK4,PMAIP1,CTS2,JUNB,HCLS1,MARCHF7,LGALS1,SOCS3,FKBP1A,RNF7,BSG,VIM,LY96,GNAI2,TSC22D3,DUSP1,CD1D,ISG15,CD37,ARHGDI1,PRDX2,NFKB1,MFNG,MBP,FYB1,LAMTOR1,DUSP22,NDUFB10,RHOG,GNAS,VSIG4,GAPT,PTPRC                          |
| Binding of T lymphocytes                | 9,75E-03 | -0,35              | MFNG,JAK2,VASP,CD48,EZR,FYB1,DEPTOR,CALR,GNAI2,CXCR4,UBE2I,RAC1,STK4,IL18R1                                                                                                                                                                                                                                                                                                                                                                           |
| Degranulation of myeloid cells          | 1,94E-09 | -0,14              | PEBP1,CORO1A,HSPA1A/HSPA1B,FTL,PTEN,PGAM1,FCGR1A,RASGRP4,FCER1G,PKM,HSPA6,LILRB4,CD63,CYSTM1,LAMTOR2,FABP5,RAP2C,CTSD,A1BG,VPS35L,CD14,CSTB,MGST1,HAVCR2,TIMP2,CYB5R3,ARMC8,VAMP7,IL4R,HLA-C,CYBA,JUNB,CTS2,DYNLL1,SERPINB1,CD59,PRDX4,APAF1,VAMP2,FCER1A,PSMD11,PSMB1,RAB5C,DUSP1,ROCK1,S100A11,CREG1,S100A8,NFKB1,VAMP8,TUBB,CSNK2B,TRAPP1,S100A9,LAMTOR1,ACA1,SERPINB6,RHOG,PDAP1,BST2,DYNLT1,CORO1B,PSMD13,PTPRC,CFD,COTL1,RAC1,ARHGAP9           |
| Degranulation of phagocytes             | 2,88E-09 | -0,14              | PEBP1,CORO1A,HSPA1A/HSPA1B,FTL,PTEN,PGAM1,FCGR1A,RASGRP4,FCER1G,PKM,HSPA6,LILRB4,CD63,CYSTM1,LAMTOR2,FABP5,RAP2C,CTSD,A1BG,VPS35L,CD14,CSTB,MGST1,HAVCR2,TIMP2,CYB5R3,ARMC8,VAMP7,IL4R,HLA-C,CYBA,JUNB,CTS2,DYNLL1,SERPINB1,CD59,PRDX4,APAF1,FCER1A,PSMD11,PSMB1,RAB5C,DUSP1,ROCK1,S100A11,CREG1,S100A8,NFKB1,VAMP8,TUBB,CSNK2B,TRAPP1,S100A9,LAMTOR1,ACA1,SERPINB6,RHOG,PDAP1,BST2,DYNLT1,CORO1B,PSMD13,PTPRC,CFD,COTL1,RAC1,ARHGAP9                 |
| Degranulation of mast cells             | 5,14E-03 | -0,14              | PEBP1,CORO1A,VAMP8,PTEN,FCGR1A,RASGRP4,FCER1G,FCER1A,HAVCR2,LILRB4,CD63,DUSP1,CORO1B,IL4R,PTPRC,JUNB                                                                                                                                                                                                                                                                                                                                                  |
| Inflammation of organ                   | 3,66E-04 | 0,00               | JUN,MBP,IFI30,JPT1,LGALS1,SOCS3,RBPJ,H3-3A/H3-3B,FCER1G,LSM1,NFKBIA,FCER1A,CXCR4,DUSP1,PHF1,IFI44,HLA-DRB5,S100A10,ELAVL1,TGFBR1,S100A11,JUNB                                                                                                                                                                                                                                                                                                         |
| Degranulation                           | 2,73E-09 | 0,04               | GAS6,PEBP1,CORO1A,HSPA1A/HSPA1B,FTL,PTEN,PGAM1,FCGR1A,RASGRP4,FCER1G,PKM,HSPA6,LILRB4,CD63,CYSTM1,LAMTOR2,FABP5,RAP2C,CTSD,A1BG,VPS35L,CD14,CSTB,MGST1,HAVCR2,TIMP2,CYB5R3,ARMC8,VAMP7,IL4R,HLA-C,CYBA,JUNB,CTS2,DYNLL1,SERPINB1,CD59,PRDX4,APAF1,VAMP2,FCER1A,PSMD11,PSMB1,RAB5C,DUSP1,ROCK1,S100A11,CREG1,S100A8,NFKB1,VAMP8,GLRX,TUBB,CSNK2B,TRAPP1,S100A9,LAMTOR1,ACA1,SERPINB6,RHOG,PDAP1,BST2,DYNLT1,CORO1B,PSMD13,PTPRC,CFD,COTL1,RAC1,ARHGAP9 |
| Degranulation of leukocytes             | 4,62E-09 | 0,11               | GAS6,PEBP1,CORO1A,HSPA1A/HSPA1B,FTL,PTEN,PGAM1,FCGR1A,RASGRP4,FCER1G,PKM,HSPA6,LILRB4,CD63,CYSTM1,LAMTOR2,FABP5,RAP2C,CTSD,A1BG,VPS35L,CD14,CSTB,MGST1,HAVCR2,TIMP2,CYB5R3,ARMC8,VAMP7,IL4R,HLA-C,CYBA,JUNB,CTS2,DYNLL1,SERPINB1,CD59,PRDX4,APAF1,VAMP2,FCER1A,PSMD11,PSMB1,RAB5C,DUSP1,ROCK1,S100A11,CREG1,S100A8,NFKB1,VAMP8,TUBB,CSNK2B,TRAPP1,S100A9,LAMTOR1,ACA1,SERPINB6,RHOG,PDAP1,BST2,DYNLT1,CORO1B,PSMD13,PTPRC,CFD,COTL1,RAC1,ARHGAP9      |

|                                                       |          |      |                                                                                                                                                                                                                                                                                                                                                                                                                                                                                                                                                                                                          |
|-------------------------------------------------------|----------|------|----------------------------------------------------------------------------------------------------------------------------------------------------------------------------------------------------------------------------------------------------------------------------------------------------------------------------------------------------------------------------------------------------------------------------------------------------------------------------------------------------------------------------------------------------------------------------------------------------------|
| Accumulation of B lymphocytes                         | 3.94E-02 | 0.15 | NFKB1,TSC22D3,CD99,BAD,PTPN1                                                                                                                                                                                                                                                                                                                                                                                                                                                                                                                                                                             |
| Viral Infection                                       | 5.69E-03 | 0.43 | CLEC4E,GLUL,LY6E,S100A9,NFKBIA,ARL4C,TIMP2,HAVCR2,ZYX,EIF1AY,GSTO1,CD63,CXCR4,EIF2AK4,KPNA4,PTPRC,TALDO1,GAPDH,BAX,ZNF175,MTX1,HERPUD1,CTSZ                                                                                                                                                                                                                                                                                                                                                                                                                                                              |
| Activation of monocytes                               | 5.80E-03 | 0.45 | ADAM9,LILRB4,LY96,CD14,TNFSF12,CD163                                                                                                                                                                                                                                                                                                                                                                                                                                                                                                                                                                     |
| Quantity of granulocytes                              | 2.23E-02 | 0.74 | SERPINB1,FASTK,GFUS,CLEC4E,PTEN,DIDO1,LGALS1,SOCS3,G6PC3,IL13RA1,PLCE1,NFKBIA,FCER1A,IRAK3,C1QA,GNAI2,SLC33A1,DUSP1,CD1D,ARHGDIAPILRA,CD300C,MPP1,S100A8,NFKB1,STK3,MFNG, JAK2,S100A9,LAMTOR1,TIMP2,ARID4A,GNAS,CEBPB,STK4                                                                                                                                                                                                                                                                                                                                                                               |
| Quantity of leukocytes                                | 1.77E-02 | 0.97 | FASTK,CORO1A,ITPR2,PTEN,CD300LF,FCGR1A,CD48,PLCE1,FCER1G,TSP0,NFKBIA,PRKACB,PRDX1,MAPKAPK2,WWOX,C1QA,LILRB4,CXCR4,SLC33A1,AFF1,FABP5,TGFBR1,PILRA,CTSD,CD300C,PAG1,TXN1 P, JAK2,HDAC3,HAVCR2,TIMP2,BAD,CEBPB,IL4R,BCLAF1,ELAVL1,RGS10,BAX,STK17B,PSMB9,SLC39A10,POU2F2,STK4,PSMB8,SERPINB1,GFUS,HCLS1,CLEC4E,DIDO1,COMT,DNMT1,LGALS1,SOCS3,TNFSF1 2,G6PC3,IL13RA1,FKBP1A,LITAF,FCER1A,IRAK3,MYO1G,BSG,GNAI2,CD302,DUSP1,CD1D,ISG15,ARHGDIAPARL,UPF2,N4BP1,CENPX,MPP1,S100A8,NFKB1,STK3,MFNG,MBP,RPS6KA3,MPG,RBPJ,S100A9,FY B1,LAMTOR1,SERPINB6,ARID4A,GNAS,RGS1,VSIG4,GAPT,ACAT1,PTPRC,CSNK2A1,RAC1      |
| Quantity of cells                                     | 1.42E-02 | 1.06 | FASTK,CORO1A,ITPR2,PTEN,CD300LF,FCGR1A,CD48,PLCE1,FCER1G,TSP0,NFKBIA,PRKACB,PRDX1,MAPKAPK2,WWOX,C1QA,LILRB4,CXCR4,SLC33A1,AFF1,FABP5,TGFBR1,PILRA,CTSD,CD300C,PAG1,TXN1 P, JAK2,HDAC3,HAVCR2,TIMP2,BAD,CEBPB,IL4R,BCLAF1,ELAVL1,RGS10,BAX,STK17B,PSMB9,SLC39A10,POU2F2,STK4,PSMB8,JUNB,SERPINB1,GFUS,HCLS1,CLEC4E,DIDO1,COMT,DNMT1,LGALS1,SOCS3,TN FSF12,G6PC3,IL13RA1,FKBP1A,LITAF,FCER1A,IRAK3,MYO1G,BSG,GNAI2,CD302,DUSP1,CD1D,ISG15,ARHGDIAPARL,UPF2,N4BP1,CENPX,MPP1,S100A8,NFKB1,STK3,MFNG,MBP,RPS6KA3,MPG,RBPJ,S100A 9,FYB1,LAMTOR1,SERPINB6,ARID4A,GNAS,RGS1,VSIG4,GAPT,ACAT1,PTPRC,CSNK2A1,RAC1 |
| Degranulation of granulocytes                         | 1.97E-08 |      | HSPA1A/HSPA1B,FTL,PGAM1,FCER1G,PKM,HSPA6,CD63,CYSTM1,LAMTOR2,FABP5,RAP2C,CTSD,A1BG,VPS35L,CD14,CSTB,MGST1,TIMP2,CYB5R3,ARMCB,VAMP7,HLA- C,CYBACTSZ,DYNLL1,SERPINB1,CD59,PRDX4,APAF1,VAMP2,PSMD11,PSMB1,RAB5C,ROCK1,S100A11,CREG1,S100A8,NFKB1,VAMP8,TUBB,CSNK2B,TRAPP1,S100A9,LAMTOR1,ACAA1,SERPINB6,RHOG, PDAP1,BST2,DYNLL1,PSMD13,PTPRC,CFD,COTL1,RAC1,ARHGAP9                                                                                                                                                                                                                                         |
| Degranulation of neutrophils                          | 2.34E-08 |      | HSPA1A/HSPA1B,FTL,PGAM1,FCER1G,PKM,HSPA6,CD63,CYSTM1,LAMTOR2,FABP5,RAP2C,CTSD,A1BG,VPS35L,CD14,CSTB,MGST1,TIMP2,CYB5R3,ARMCB,VAMP7,HLAC,CYBACTSZ,DYNLL1,SERPINB1,CD5 9,PRDX4,APAF1,PSMD11,PSMB1,RAB5C,ROCK1,S100A11,CREG1,S100A8,NFKB1,VAMP8,TUBB,CSNK2B,TRAPP1,S100A9,LAMTOR1,ACAA1,SERPINB6,RHOG,PDAP1,BST2,DYNLL1,PSMD13,PTPRC,CFD,C OTL1,RAC1,ARHGAP9                                                                                                                                                                                                                                                |
| Hypersensitive reaction                               | 1.23E-06 |      | JUN,IFI30,JPT1,LGALS1,H3-3A/H3-3B,FCER1G,FCER1A,CXCR4,DUSP1,PHF1,HLA-DRB5,IL4R,TGFBR1,S100A11,JUNB                                                                                                                                                                                                                                                                                                                                                                                                                                                                                                       |
| Allergy                                               | 2.29E-06 |      | JUN,IFI30,JPT1,LGALS1,H3-3A/H3-3B,FCER1G,FCER1A,CXCR4,DUSP1,PHF1,HLA-DRB5,IL4R,TGFBR1,S100A11,JUNB                                                                                                                                                                                                                                                                                                                                                                                                                                                                                                       |
| Dermatitis                                            | 2.95E-06 |      | JUN,IFI30,JPT1,LGALS1,H3-3A/H3-3B,FCER1G,FCER1A,CXCR4,DUSP1,PHF1,HLA-DRB5,TGFBR1,S100A11,JUNB                                                                                                                                                                                                                                                                                                                                                                                                                                                                                                            |
| Immediate hypersensitivity                            | 3.64E-06 |      | JUN,IFI30,JPT1,LGALS1,H3-3A/H3-3B,FCER1G,FCER1A,CXCR4,DUSP1,PHF1,HLA-DRB5,IL4R,S100A11,JUNB                                                                                                                                                                                                                                                                                                                                                                                                                                                                                                              |
| Atopic dermatitis                                     | 4.58E-06 |      | JUN,IFI30,JPT1,LGALS1,H3-3A/H3-3B,FCER1G,FCER1A,CXCR4,DUSP1,PHF1,HLA-DRB5,S100A11,JUNB                                                                                                                                                                                                                                                                                                                                                                                                                                                                                                                   |
| Immune mediated inflammatory disease                  | 1.50E-05 |      | JUN,CLEC4E,GLUL,HSPA1A/HSPA1B,TNRC6B,LGALS1,LY6E,DNAJC4,FCER1G,GADD45B,IL1R2,NFKBIA,PRDX1,FCER1A,VIM,CXCR4,FKBP5,DUSP1,HLADR85,S100A10,ZNF326,S100A11,ST6GALNAC4,S100A 8,IFI30,JPT1,S100A9,H3-3A/H3-3B,CHCHD2,NDUFB10,GNB2,ARF1,UQCRC2,BST2,RGS1,PHF1,IFI44,CEBPB,PTPRC,TALDO1,BAX,TBRG1,STK17B,JUNB,DYNLL1                                                                                                                                                                                                                                                                                              |
| Rheumatoid arthritis                                  | 2.23E-04 |      | CLEC4E,GLUL,HSPA1A/HSPA1B,TNRC6B,LGALS1,DNAJC4,GADD45B,IL1R2,NFKBIA,PRDX1,VIM,CXCR4,FKBP5,DUSP1,S100A10,ZNF326,ST6GALNAC4,S100A8,S100A9,H3-3A/H3- 3B,CHCHD2,NDUFB10,GNB2,ARF1,UQCRC2,CEBPB,PTPRC,TALDO1,TBRG1,STK17B,DYNLL1                                                                                                                                                                                                                                                                                                                                                                              |
| Inflammation of joint                                 | 5.57E-04 |      | CLEC4E,GLUL,HSPA1A/HSPA1B,APAF1,TNRC6B,LGALS1,DNAJC4,GADD45B,IL1R2,NFKBIA,PRDX1,VIM,GNAI2,CXCR4,FKBP5,DUSP1,S100A10,ZNF326,ST6GALNAC4,S100A8,S100A9,H3-3A/H3- 3B,CHCHD2,NDUFB10,GNB2,ARF1,UQCRC2,CEBPB,PHB2,PTPRC,TALDO1,TBRG1,STK17B,DYNLL1                                                                                                                                                                                                                                                                                                                                                             |
| Systemic autoimmune syndrome                          | 6.94E-04 |      | CLEC4E,GLUL,HSPA1A/HSPA1B,TNRC6B,LY6E,LGALS1,DNAJC4,GADD45B,IL1R2,PRDX1,NFKBIA,VIM,CXCR4,FKBP5,DUSP1,S100A10,ZNF326,ST6GALNAC4,S100A8,S100A9,H3-3A/H3- 3B,CHCHD2,NDUFB10,GNB2,ARF1,UQCRC2,BST2,IFI44,CEBPB,PTPRC,TALDO1,BAX,TBRG1,STK17B,DYNLL1                                                                                                                                                                                                                                                                                                                                                          |
| Rheumatic Disease                                     | 7.74E-04 |      | CLEC4E,GLUL,HSPA1A/HSPA1B,APAF1,TNRC6B,LGALS1,LY6E,DNAJC4,GADD45B,IL1R2,PRDX1,NFKBIA,VIM,GNAI2,CXCR4,FKBP5,DUSP1,S100A10,ZNF326,ST6GALNAC4,S100A8,S100A9,H3-3A/H3- 3B,CHCHD2,NDUFB10,GNB2,ARF1,UQCRC2,BST2,RGS1,IFI44,CEBPB,PHB2,PTPRC,TALDO1,BAX,TBRG1,STK17B,DYNLL1                                                                                                                                                                                                                                                                                                                                    |
| Severe acute respiratory syndrome                     | 2.74E-03 |      | GLUL,CLEC4E,S100A9,NFKBIA,ARL4C,TIMP2,ZYX,EIF1AY,CD63,GSTO1,GAPDH,TALDO1,MTX1,CTSZ                                                                                                                                                                                                                                                                                                                                                                                                                                                                                                                       |
| Emigration of thymocytes                              | 2.83E-03 |      | CXCR4,IL4R,STK4                                                                                                                                                                                                                                                                                                                                                                                                                                                                                                                                                                                          |
| Cytotoxicity of peripheral blood natural killer cells | 4.75E-03 |      | VASP,CD48,HAVCR2                                                                                                                                                                                                                                                                                                                                                                                                                                                                                                                                                                                         |
| Degranulation of lysosome                             | 7.30E-03 |      | CORO1A,GLRX,CORO1B                                                                                                                                                                                                                                                                                                                                                                                                                                                                                                                                                                                       |
| Deficiency of T lymphocytes                           | 8.54E-03 |      | RBPJ,PTPRC                                                                                                                                                                                                                                                                                                                                                                                                                                                                                                                                                                                               |
| Chemotaxis of hematopoietic progenitor cells          | 1.44E-02 |      | CXCR4,GNAI2,RGS1,STK4                                                                                                                                                                                                                                                                                                                                                                                                                                                                                                                                                                                    |
| Polycythemia                                          | 1.44E-02 |      | CALR,GNAI2,CD63,JAK2                                                                                                                                                                                                                                                                                                                                                                                                                                                                                                                                                                                     |
| Autoimmune response                                   | 1.44E-02 |      | PTEN,BAX,PTPN1                                                                                                                                                                                                                                                                                                                                                                                                                                                                                                                                                                                           |
| Cell proliferation of Langerhans cells                | 1.65E-02 |      | RPS6KA3,LAMTOR2                                                                                                                                                                                                                                                                                                                                                                                                                                                                                                                                                                                          |
| Distribution of phosphatidylserine                    | 1.65E-02 |      | LGALS1,PTPRC                                                                                                                                                                                                                                                                                                                                                                                                                                                                                                                                                                                             |

|                                               |          |                                                                                                                 |
|-----------------------------------------------|----------|-----------------------------------------------------------------------------------------------------------------|
| Emigration of single positive thymocytes      | 1.65E-02 | IL4R,STK4                                                                                                       |
| Generation of filament barbed ends            | 1.65E-02 | VASP,RAC1                                                                                                       |
| Phagocytic capacity of peritoneal macrophages | 1.65E-02 | G6PC3,ISG15                                                                                                     |
| Presence of thymocytes                        | 1.65E-02 | CXCR4,BAX                                                                                                       |
| Juvenile rheumatoid arthritis                 | 1.85E-02 | S100A8,HSPA1A/HSPA1B,LGALS1,S100A9,DNAJC4,GADD45B,NFKBIA,NDUFB10,CEBPG,S100A10,PTPRC,TALDO1,ZNF326,TBRG1,DYNLL1 |
| Interaction of CD4+ T-lymphocytes             | 1.90E-02 | CXCR4,UBE2I,FYB1                                                                                                |
| Sepsis                                        | 1.90E-02 | NFKB1,CD14,NFKBIA                                                                                               |
| Adhesion of peripheral T lymphocyte           | 2.44E-02 | CXCR4,FYB1,RAC1                                                                                                 |
| Chemokinesis of leukocytes                    | 2.44E-02 | S100A9,CAST,RAC1                                                                                                |
| Accumulation of Single positive thymocytes    | 2.65E-02 | IL4R,STK4                                                                                                       |
| Concentration of cholesterol ester            | 2.65E-02 | ACAT1,PKM                                                                                                       |
| Ingestion of cells                            | 2.65E-02 | CALR,LRP1                                                                                                       |
| Myeloproliferative neoplasm                   | 2.65E-02 | CALR,JAK2                                                                                                       |
| Polarization of M1 macrophages                | 2.65E-02 | SOCS3,RBPJ                                                                                                      |
| Proliferation of CD3 positive T-lymphocytes   | 2.65E-02 | LILRB4,PTPRC                                                                                                    |
| Synthesis of 5-hydroxyeicosatetraenoic acid   | 2.65E-02 | ALOX5AP,COTL1                                                                                                   |
| Activation of peripheral blood monocytes      | 3.83E-02 | LY96,CD14                                                                                                       |
| Antibody-dependent cell-mediated cytotoxicity | 3.83E-02 | CD59,VASP                                                                                                       |
| Chemokinesis of neutrophils                   | 3.83E-02 | S100A9,CAST                                                                                                     |
| G2 phase of T lymphocytes                     | 3.83E-02 | LGALS1,IL4R                                                                                                     |
| G2/M phase                                    | 3.83E-02 | LGALS1,IL4R                                                                                                     |
| Transition of double-positive thymocyte       | 3.83E-02 | HDAC2,PTEN                                                                                                      |
| Abnormal function of neutrophils              | 3.84E-02 | SERPINB1,HSPB1,FASTK,MPP1,GNAI2,CD14,G6PC3,RASGRP4,PILRA                                                        |
| Migration of hematopoietic progenitor cells   | 3.87E-02 | GNAI2,CXCR4,IL4R,STK4                                                                                           |
| Atherosclerosis                               | 3.94E-02 | JUN,ACAT1,PKM,MAPKAPK2,JUNB                                                                                     |
| Function of immune system                     | 4.33E-02 | LILRB4,GNAI2,CD300LF,FCGR1A,RASGRP4,FCER1G,FCER1A                                                               |
| Morphology of dendritic cells                 | 4.38E-02 | RPS6KA3,LAMTOR2,TGFBR1,STK4,CTSZ                                                                                |
| Function of mast cells                        | 4.46E-02 | LILRB4,CD300LF,FCGR1A,RASGRP4,FCER1G,FCER1A                                                                     |

---



Supplementary Table 10. List of DEGs in cluster 0 and cluster 2, related to *Cytoskeletal rearrangement, cell motility and cell-cell interactions* and *Activation state*.

| geni     | log2FC cluster 0 vs cluster 2 | adj p value |
|----------|-------------------------------|-------------|
| HSPA1B   | -1,95                         | 2,46E-16    |
| FCER1A   | -1,91                         | 2,66E-09    |
| HSPA1A   | -1,86                         | 4,05E-13    |
| CXCR4    | -1,42                         | 2,02E-17    |
| RGS1     | -1,41                         | 2,82E-15    |
| DEPTOR   | -1,35                         | 1,44E-12    |
| EIF2AK4  | -1,35                         | 2,90E-06    |
| CLEC4E   | -1,31                         | 4,66E-03    |
| AFDN     | -1,25                         | 1,01E-05    |
| PTEN     | -1,21                         | 4,93E-04    |
| ITSN1    | -1,13                         | 1,46E-06    |
| FER      | -1,11                         | 8,27E-10    |
| CD302    | -1,10                         | 7,59E-12    |
| JAK2     | -1,07                         | 4,63E-06    |
| PTPRC    | -1,06                         | 2,18E-15    |
| IL18R1   | -1,04                         | 8,71E-08    |
| ROCK1    | -1,02                         | 1,15E-05    |
| STXBP5   | -1,01                         | 3,95E-09    |
| CSF2RA   | -1,01                         | 7,34E-08    |
| PRKACB   | -0,94                         | 6,32E-03    |
| HCLS1    | -0,90                         | 2,08E-11    |
| CALM1    | 0,55                          | 3,80E-04    |
| RPS6KB2  | 0,84                          | 1,05E-10    |
| ARPC1A   | 0,85                          | 4,03E-04    |
| SMPD2    | 0,85                          | 2,40E-03    |
| BAD      | 0,85                          | 7,47E-08    |
| RAC1     | 0,86                          | 2,39E-03    |
| AP2S1    | 0,87                          | 2,16E-11    |
| ACTG1    | 0,87                          | 5,10E-04    |
| FYB1     | 0,88                          | 1,18E-05    |
| ARPC1B   | 0,89                          | 6,12E-08    |
| PKM      | 0,90                          | 1,50E-05    |
| CAST     | 0,90                          | 1,67E-04    |
| CREB3L4  | 0,90                          | 4,86E-03    |
| ADAM9    | 0,92                          | 1,65E-03    |
| LITAF    | 0,92                          | 3,94E-04    |
| GAS6     | 0,92                          | 7,70E-03    |
| RASGRP4  | 0,92                          | 3,83E-03    |
| PFN1     | 0,93                          | 4,35E-07    |
| SIGLEC7  | 0,94                          | 7,51E-03    |
| MT-ND1   | 0,94                          | 9,28E-08    |
| SOCS3    | 0,95                          | 9,91E-04    |
| PTPN1    | 0,96                          | 8,27E-03    |
| PLD3     | 0,97                          | 5,51E-04    |
| PILRA    | 0,97                          | 1,13E-04    |
| GPAA1    | 0,97                          | 2,75E-03    |
| MPP1     | 0,99                          | 3,78E-04    |
| TGFBR1   | 0,99                          | 5,74E-03    |
| MFNG     | 0,99                          | 2,52E-06    |
| CDK5     | 0,99                          | 9,25E-05    |
| MAPKAPK2 | 1,00                          | 1,65E-03    |
| TNFSF12  | 1,02                          | 2,28E-03    |
| SGTA     | 1,04                          | 9,96E-06    |
| FCER1G   | 1,04                          | 1,83E-07    |
| TIMP2    | 1,06                          | 6,54E-06    |
| LRP1     | 1,08                          | 7,73E-05    |
| IL4R     | 1,12                          | 2,88E-07    |
| UCP2     | 1,13                          | 5,62E-03    |
| CALR     | 1,14                          | 5,34E-06    |
| G6PC3    | 1,14                          | 4,84E-06    |
| CD63     | 1,17                          | 1,23E-09    |
| CTSZ     | 1,22                          | 1,67E-08    |
| MYO1G    | 1,24                          | 5,39E-04    |
| CALM3    | 1,32                          | 9,00E-14    |
| ALOX5AP  | 1,39                          | 5,49E-08    |
| NINJ1    | 1,43                          | 1,11E-06    |
| PRDX1    | 1,55                          | 2,16E-12    |
| S100A10  | 1,58                          | 7,37E-06    |
| FCGR1A   | 1,81                          | 1,69E-08    |
| CD14     | 1,96                          | 2,02E-03    |
| LGALS1   | 2,06                          | 4,17E-06    |
| C1QA     | 2,50                          | 3,31E-03    |
| S100A9   | 2,82                          | 1,71E-03    |
| S100A8   | 2,93                          | 1,65E-03    |
